# Supplementary material
Source: PubMed Central journal article supplement (PMC6994131)
Supplement: jci-130-130144-s024.pdf [file jci-130-130144-s024.pdf]

## Supplementary Material

In the supplementary material, we first present the Supplementary Figures, then Supplementary Tables. These are followed by four reports on genes of interest called as enriched or depleted by multiple criteria in different comparisons. We conclude with a short Supplementary Analysis.

### Supplementary Figures

Figure S1. Favored integration in active transcription units. (Top) Favoring of integration in CR/PRtd in active transcription units. RNA-seq data was used to annotate gene activity (as reads per kilobase per million; RPKM), then genes were distributed into 10 bins with equal numbers of genes, ranked from lowest to highest RPKM (x-axis). Integration sites (fragments called by sonicAbundance) were then distributed into those bins and scored (y-axis). (Bottom) As in (Top), but using RNA-seq data and integration site data for PR/NR. RNA-seq data used in this study was from Fraietta et al., Nat. Med 24, 563-571, 2018.

Figure S2. Assessment of genes shared by expanded clones from infusion products (TDN), day 28 samples from CR/PRtd, and day 28 samples from PR/NR patients. The top 50 clones were selected from each population (data from Figure 3 A-C). Genes associated with expanded clones only with TDN products: NEMF, ZNF34, RMDN1, TYROBP, OTUD5, SURF4, AQR, ZSWIM1, PPP6C, SFMBT2, TSR1, ARAF, KIF2C,

WDR82, DNM2, LARP4B, TMEM135, THOC6, ABCA7, MYO9B, NFKBIL1, VPS51, PMEL, MUM1, LPIN2, GAB3, IRAK1BP1, SPDYE3, HAGH, NVL, EIF2B3, STARD7, GARS, FCHSD2, DLEU2, LIPC, ZNF682, STAU1, SKI, LZTR1, GMDS, EHD1, NLRC3, SMCHD1, KDM4A, MSH4, ETF1, FAM193B, MED13L, SPTSSA, SMG6, CD3EAP, MAP4K1, PPP6R2, SEC14L1, ETV3, POLH, FOXO3, ZNF213, CBFA2T3, SLC6A16, STAT5B. Genes associated with expanded clones only with day 28 products from CR/PRtd patients: KCTD3, PATL1, SRCAP, SSH2, SNHG12, ATP2A2, CARD8, PIKFYVE, ZZEF1, VAV1, PDCD11, RABEP1, PPP1CB, GFOD2, AP4M1, OGFOD1, SPATA5, CDK11B, FOPNL, CPEB2, YLPM1, MVB12B, MARK4, JAK3, KANTR, ATAT1, PPP6R3, SLC38A10, COL4A3BP, ZNF251, XPO5, ATP6V0C, USP14, ZNF563, ZNF565, PGD, NUP214, CCP110, CFBF, TRUB1, TMTC2, MED13, MCM3AP-AS1, SRSF11, MRPS10, SUPT3H, LOC102724064, CTCF. Genes associated with expanded clones only with day 28 products from PR/NR patients: IFNGR2, LTA4H, TRIM37, GUF1, STK4, LOC100128568, DPYD, TULP2, POLR2A, EIF3E, BUB1B, SLC3A2, MAN1B1, LRRK2, CD96, ATF7IP, AKT2, MAN2A1, MCF2L2, CD69, SBNO2, AKT3, OXR1, NCOR1, CASK, ZNF609, TNIP3, TPR, LINC02015, SMARCA2, EDRF1, NPRL3, IL21R, CTC1, CPNE1, CHIC1, TRAPPC12, SLC8A1-AS1, DAG1, ANP32B, CWF19L2, NAA30, SF3A2, FAM217B, GGA3, KANSL3, CDC73, NSD1, SYNE1, UBAP2, GNB1, SF1, CCDC137, TENM1, KDM1A, TMEM57, MACF1, DHX9, C1orf27, FAM168B, SLC16A14, LOC101929411, GNL1, PCM1, CHORDC1, NCAPD3, NECAP1, RPAP3, SCYL2, TTC8, LOC100128108, NFATC2IP, GINS2, PIGN, RP2. Genes associated in expanded clones in both TDN products and day 28 products from CR/PRtd patients: LEF1, NPLOC4, SAFB, NAA38, PRKD2. Genes

associated with expanded clones in both TDN products and day 28 products from PR/NR patients: RBX1. Genes associated with expanded clones in both CR/PRtd and PR/NR patients on day 28 samples: CLEC16A.

Figure S3. Integration sites in cells undergoing clonal expansion are found recurrently in specific host genes across multiple patients. We sought to test the possibility that the same clones expanded in abundance in multiple CART19 patients. To assess this, we first selected the top 5% most abundant clones from each patient (based on SonicAbundance). We then plotted how often the genes marked by integration were found in the top 5% most abundant clones in other patients. In the figure, the number of patients sharing an expanded clone is shown on the x-axis, and the y-axis shows the number of clones shared overall for the given number of patients sharing clones. For example, a total of 18 genes (y-axis) were shared across 7 patients (x-axis). To analyze the background of sharing expected by chance (taking account of differential integration frequency in different transcription units), we sampled a random 5% of genes from each patient, and repeated the overlap calculation. This was repeated 1000 times, and the resulting permutation background plotted (red dots). Error bars indicate Standard Deviation. Thus the observed sharing is far greater than that expected by chance as reported by the permutation background. Specific genes detected are as follows:  
Observed across 7 patients: CFBF, CBLB, CREBBP, EPB41, GNB1, HN1L, LPP, MECP2, NFATC3, PPP6R2, PPP6R3, RPTOR, SAFB, SAFB2, SMG1, TNRC6B, VAV1, XPO5. Observed across 8 patients: CLEC16A, EP300, HNRNPUL2- BSCL2, MIR5096,

NSD1, UTRN. Observed across 9 patients: DNMT1, KDM2A, RNF157. Clones within NPLOC4 were observed in 11 patients and clones within FANCA were observed in 12 patients.

Figure S4. Gene ontology analysis of genes called as influencing T cell proliferation. Heatmaps indicating the proportion of each gene ontology term (**A**) or KEGG pathway (**B**). The four criteria for calling genes were each analyzed separately and are shown in the columns. Asterisks indicate significant enrichment for the term over random distributions (Fisher's exact test based on noncentral hypergeometric distributions). The rows show GO terms (**A**) or KEGG pathways (**B**) called as enriched by at least one criteria.

Figure S5. Comparing clonal diversity between TCR-beta sequencing results from CART19 sorted T-cells and vector integration sites from peripheral blood (measured by Shannon Index). P-values were determined from the Spearman correlation. Blue points indicate data from CR/PRtd patients, red points indicate data from PR/NR patients. Circles represent patients with CLL, triangles represent patients with ALL (upward pointing, Adult ALL; downward pointing, Pediatric ALL). All TCR-beta sequencing data was collected from CAR+ sorted T-cells. T cell subsets analyzed included CD3+, CART19+, and in some cases CD4+-sorted or CD8+-sorted. An comparison of TCR diversity before transplantation and after transplantation yielded a non-significant Spearman correlation.

Figure S6. Model optimization based on vector integration sites from infusion products or day 28 samples. A total of 91 features (Table S6) spanning population metrics, genomic features, and epigenetic features from 29 patients were used in least absolute shrinkage and selection operator (LASSO) logistic regression to build a classification model. Results from leave-one-out cross-validation of models based on transduction/pre-infusion products (A) and day 28 peripheral blood samples (B). The top horizontal numbers indicate the number of principal components used in the classification model, while the x-axis indicates the lambda constant used for tuning the model, and the y-axis shows misclassification error. Error bars indicated standard error. The minimum value of misclassification is indicated to the right of the plots. A similar comparison of data for ALL subjects versus CLL subjects is in Figure S8.

Figure S7. Central Memory T-cell proportions within Infusion Products. Proportion of central memory T-cells are shown for infusion products of CLL and ALL patients. Central Memory T-cells frequencies were identified at apheresis by the following markers: CD8+, CCR7+, and CD45RO+. Mean and standard error of the associated data are shown. No significant difference was identified between response groups within ALL or CLL as determined by a two-tailed T-test.

Figure S8. Disease specific analysis of integration site profiles. A LASSO regression was used to identify variables within integration site profiles that would separate CLL and ALL patients. Analysis was performed on infusion products, and the percent contribution to the overall variance between the groups is displayed for values greater than 1%.

## Supplementary Tables

Table S1. Patient metadata and results of integration site sequencing.

Table S2. Summary of patient ages in the CLL and ALL cohorts

Table S3. Patient DNA samples analyzed by integration site sequencing.

Table S4. Gene sets used for analysis, including cancer associated genes, human lymphoid cancer genes, and genes associated with clonal hematopoiesis, and overlaps between lists. Origins of gene lists are as follows: Bushman Lab allOnco List: (Sadelain et al., 2011, <http://www.bushmanlab.org/links/genelists>); Lymphoid cancer list: (personal communication, Marina Cavazzana, <http://www.bushmanlab.org/links/genelists>); COSMIC: (Sondka, Z. *et al.* 2018 Nature Cancer Reviews), TCGA\_Xie and Clonal\_Hema\_Xie (Xie, M. *et al.* 2014 Nature Medicine).

Table S5. Statistical analysis of overlaps among genes called at integration sites and cancer associated gene lists in Table S4. The references for each list are included in the table.

Table S6. 91 model variables used in the LASSO regression analysis.

Table S7. Sources of antibodies used.

| Specificity | Clone    | Conjugate                 | Supplier                                                       | Catalog Number |
|-------------|----------|---------------------------|----------------------------------------------------------------|----------------|
| CD3         | OKT3     | Brilliant Violet (BV) 605 | BioLegend                                                      | 317322         |
| CAR19       | 136.20.1 | Alexa Fluor (AF) 647      | Kind gift of B. Jena and L. Cooper (MD Anderson Cancer Center) | --             |
| CD8         | RPA-T8   | BV650                     | BioLegend                                                      | 301042         |
| CD4         | OKT4     | BV785                     | BioLegend                                                      | 317442         |
| CD45        | 2D1      | Phycoerythrin BE          | BioLegend                                                      | 368510         |

### Supplementary Reports.

Supplementary report 1: Genes of interest marked by vector integration from all patients.

Supplementary report 2: Genes of interest marked by vector integration from CLL patients.

Supplementary report 3: Genes of interest marked by vector integration from ALL patients.

Supplementary report 4: Genes of interest marked by vector integration from CR/PRtd patients.

### Supplementary Analysis

Supplementary analysis: effects of age. We compared data on age and the proportion of central memory cells and found that younger patients have lower proportions of

central memory cells (Figure S7). However, within ALL or CLL there was no association of age versus response and nonresponse. Regarding integration site distributions, a significant difference could be detected between the ALL and CLL subjects using a LASSO regression model (Figure S8).



**Figure S1**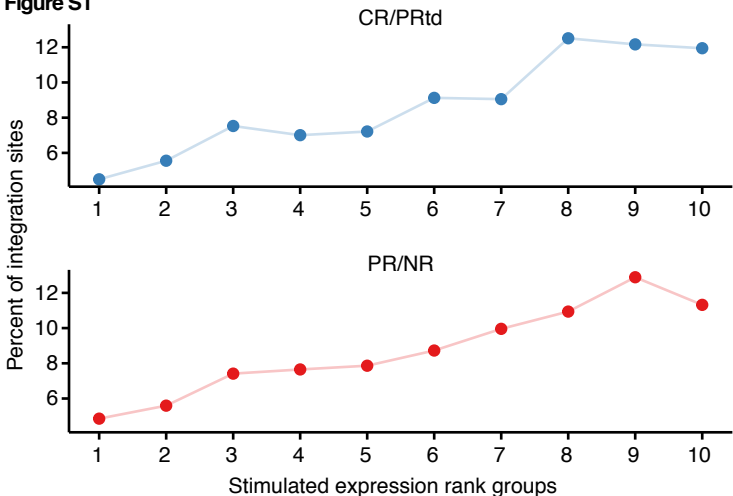

**Figure S1. Favored integration in active transcription units.** Figure S1. Favored integration in active transcription units. (Top) Favoring of integration in CR/PRtd in active transcription units. RNA-seq data was used to annotate gene activity (as reads per kilobase per million; RPKM), then genes were distributed into 10 bins with equal numbers of genes, ranked from lowest to highest RPKM (x-axis). Integration sites (fragments called by sonicAbundance) were then distributed into those bins and scored (y-axis). (Bottom) As in (Top), but using RNA-seq data and integration site data for PR/NR. RNA-seq data used in this study was from Fraietta et al., Nat. Med 24, 563-571, 2018.

**Figure S2**

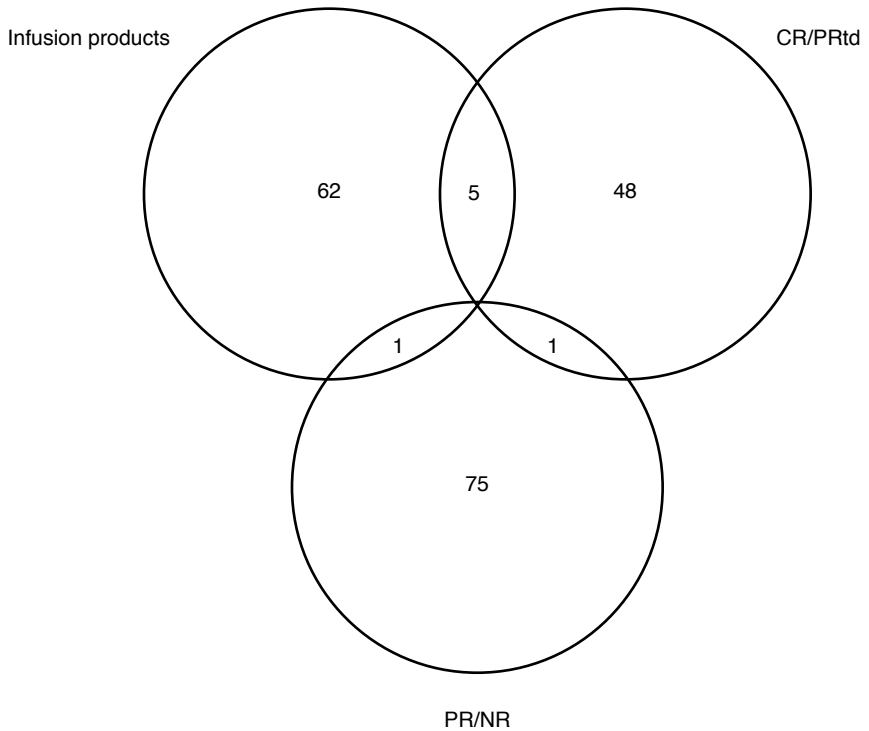

**Figure S2. Assessment of genes shared by expanded clones from infusion products (TDN), day 28 samples from CR/PRtd, and day 28 samples from PR/NR patients.** The top 50 clones were selected from each population (data from Figure 3 A-C). Genes associated with expanded clones only with TDN products: NEMF, ZNF34, RMDN1, TYROBP, OTUD5, SURF4, AQR, ZSWIM1, PPP6C, SFMBT2, TSR1, ARAF, KIF2C, WDR82, DNM2, LARP4B, TMEM135, THOC6, ABCA7, MYO9B, NFKBIL1, VPS51, PMEL, MUM1, LPIN2, GAB3, IRAK1BP1, SPDYE3, HAGH, NVL, EIF2B3, STARD7, GARS, FCHSD2, DLEU2, LIPC, ZNF682, STAU1, SKI, LZTR1, GMDS, EHD1, NLRC3, SMCHD1, KDM4A, MSH4, ETF1, FAM193B, MED13L, SPTSSA, SMG6, CD3EAP, MAP4K1, PPP6R2, SEC14L1, ETV3, POLH, FOXO3, ZNF213, CBFA2T3, SLC6A16, STAT5B. Genes associated with expanded clones only with day 28 products from CR/PRtd patients: KCTD3, PATL1, SRCAP, SSH2, SNHG12, ATP2A2, CARD8, PIKFYVE, ZZF1, VAV1, PDCD11, RABEP1, PPP1CB, GFOD2, AP4M1, OGFOD1, SPATA5, CDK11B, FOPNL, CPEB2, YLPM1, MVB12B, MARK4, JAK3, KANTR, ATAT1, PPP6R3, SLC38A10, COL4A3BP, ZNF251, XPO5, ATP6V0C, USP14, ZNF563, ZNF565, PGD, NUP214, CCP110, CBFB, TRUB1, TMTC2, MED13, MCM3AP-AS1, SRSF11, MRPS10, SUPT3H, LOC102724064, CTCF. Genes associated with expanded clones only with day 28 products from PR/NR patients: IFNGR2, LTA4H, TRIM37, GUF1, STK4, LOC100128568, DPYD, TULP2, POLR2A, EIF3E, BUB1B, SLC3A2, MAN1B1, LRRK2, CD96, ATF7IP, AKT2, MAN2A1, MCF2L2, CD69, SBNO2, AKT3, OXR1, NCOR1, CASK, ZNF609, TNIP3, TPR, LINC02015, SMARCA2, EDRF1, NPRL3, IL21R, CTC1, CPNE1, CHIC1, TRAPPC12, SLC8A1-AS1, DAG1, ANP32B, CWF19L2, NAA30, SF3A2, FAM217B, GGA3, KANSL3, CDC73, NSD1, SYNE1, UBAP2, GNB1, SF1, CCDC137, TENM1, KDM1A, TMEM57, MACF1, DHX9, C1orf27, FAM168B, SLC16A14, LOC101929411, GNL1, PCM1, CHORDC1, NCAPD3, NECAP1, RPAP3, SCYL2, TTC8, LOC100128108, NFATC2IP, GINS2, PIGN, RP2. Genes associated in expanded clones in both TDN products and day 28 products from CR/PRtd patients: LEF1, NPLOC4, SAFB, NAA38, PRKD2. Genes associated with expanded clones in both TDN products and day 28 products from PR/NR patients: RBX1. Genes associated with expanded clones in both CR/PRtd and PR/NR patients on day 28 samples: CLEC16A.

**Figure S3**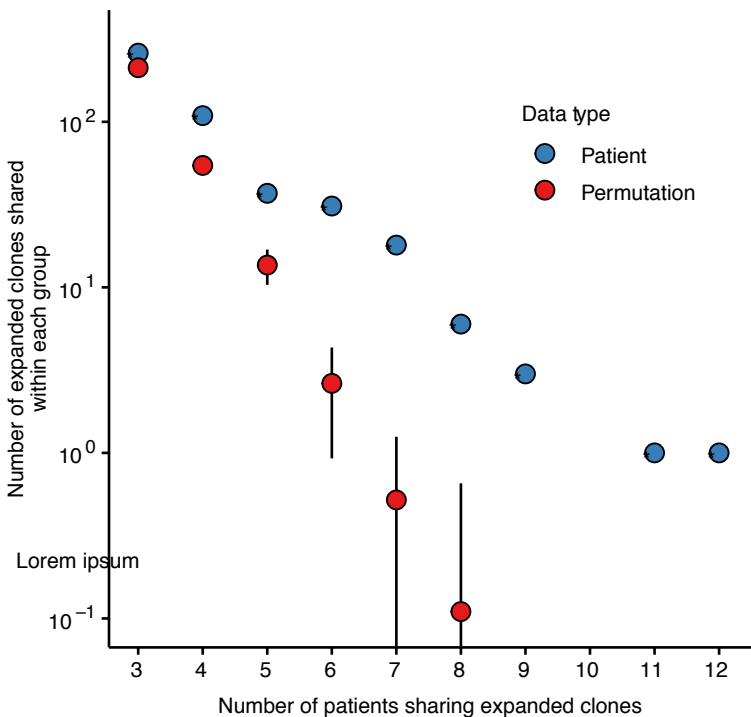

**Figure S3. Integration sites in cells undergoing clonal expansion are found recurrently in specific host genes across multiple patients.** We sought to test the possibility that the same clones expanded in abundance in multiple CART19 patients. To assess this, we first selected the top 5% most abundant clones from each patient (based on SonicAbundance). We then plotted how often the genes marked by integration were found in the top 5% most abundant clones in other patients. In the figure, the number of patients sharing an expanded clone is shown on the x-axis, and the y-axis shows the number of clones shared overall for the given number of patients sharing clones. For example, a total of 18 genes (y-axis) were shared across 7 patients (x-axis). To analyze the background of sharing expected by chance (taking account of differential integration frequency in different transcription units), we sampled a random 5% of genes from each patient, and repeated the overlap calculation. This was repeated 1000 times, and the resulting permutation background plotted (red dots). Error bars indicate Standard Deviation. Thus the observed sharing is far greater than that expected by chance as reported by the permutation background. Specific genes detected are as follows: Observed across 7 patients: CBF, CBLB, CREBBP, EPB41, GNB1, HN1L, LPP, MECP2, NFATC3, PPP6R2, PPP6R3, RPTOR, SAFB, SAFB2, SMG1, TNRC6B, VAV1, XPO5. Observed across 8 patients: CLEC16A, EP300, HNRNPUL2- BSCL2, MIR5096, NSD1, UTRN. Observed across 9 patients: DNMT1, KDM2A, RNF157. Clones within NPLOC4 were observed in 11 patients and clones within FANCA were observed in 12 patients.

**Figure S4**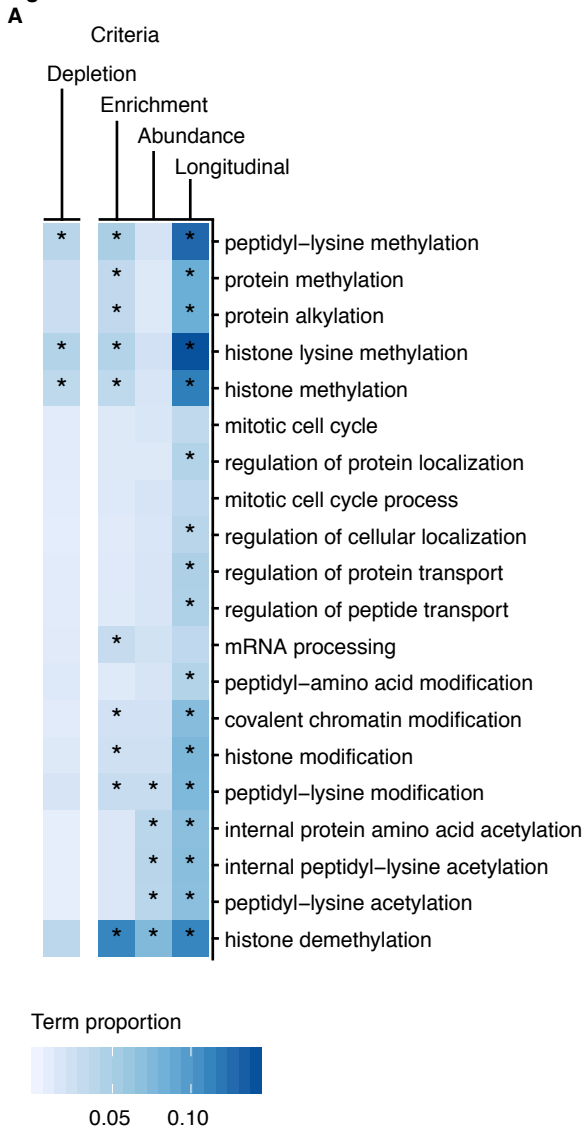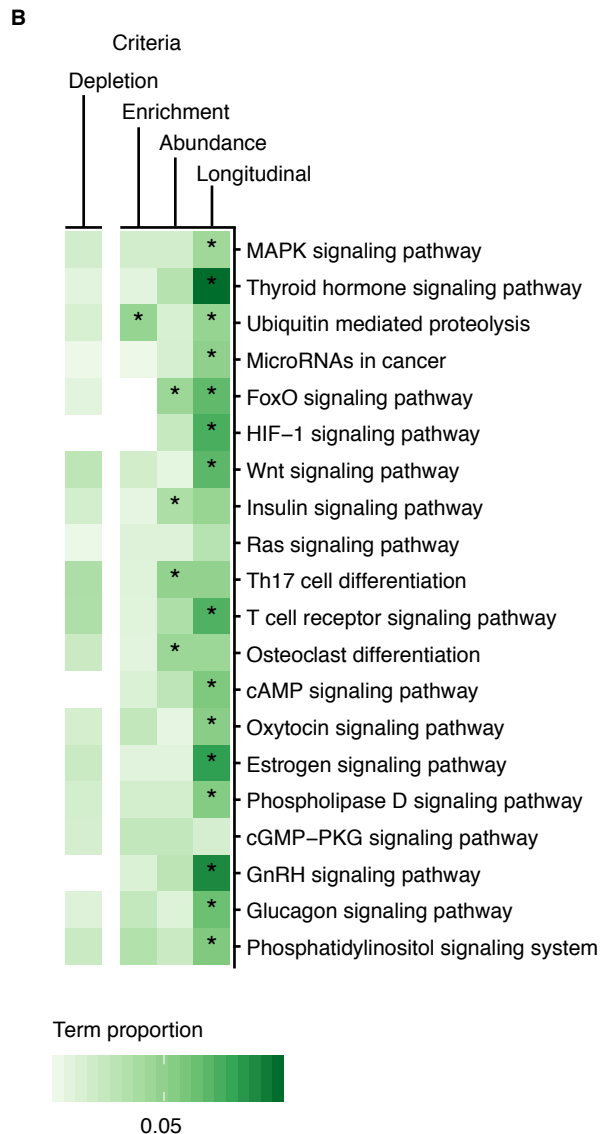

**Figure S4. Gene ontology analysis of genes called as influencing T cell proliferation.** Heatmaps indicating the proportion of each gene ontology term (A) or KEGG pathway (B). The four criteria for calling genes were each analyzed separately and are shown in the columns. Asterisks indicate significant enrichment for the term over random distributions (Fisher's exact test based on noncentral hypergeometric distributions). The rows show GO terms (A) or KEGG pathways (B) called as enriched by at least one criteria.

**Figure S5**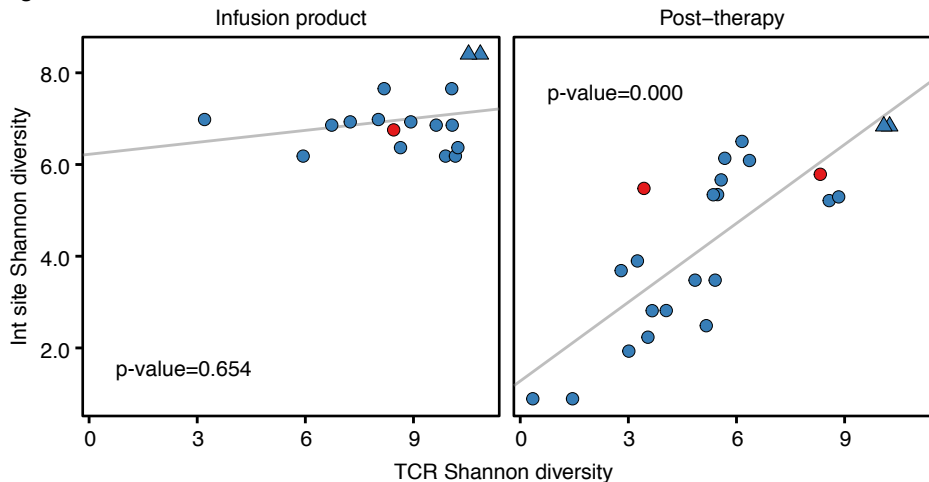

**Figure S5. Comparing clonal diversity between TCR-beta sequencing results from CART19 sorted T-cells and vector integration sites from peripheral blood (measured by Shannon Index).** P-values were determined from the Spearman correlation. Blue points indicate data from CR/PRtd patients, red points indicate data from PR/NR patients. Circles represent patients with CLL, triangles represent patients with ALL (upward pointing, Adult ALL; downward pointing, Pediatric ALL). All TCR-beta sequencing data was collected from CAR+ sorted T-cells. T cell subsets analyzed included CD3+, CART19+, and in some cases CD4+-sorted or CD8+-sorted. An comparison of TCR diversity before transplantation and after transplantation yielded a non-significant Spearman correlation.

**Figure S6****A**

Transduction product model

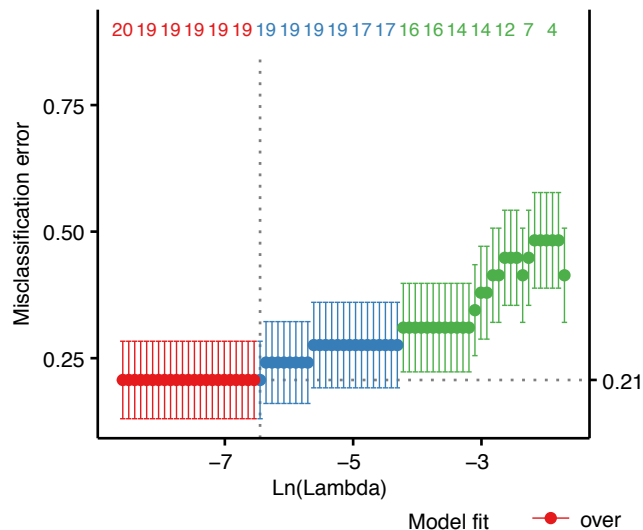**B**

Day 28 sample model

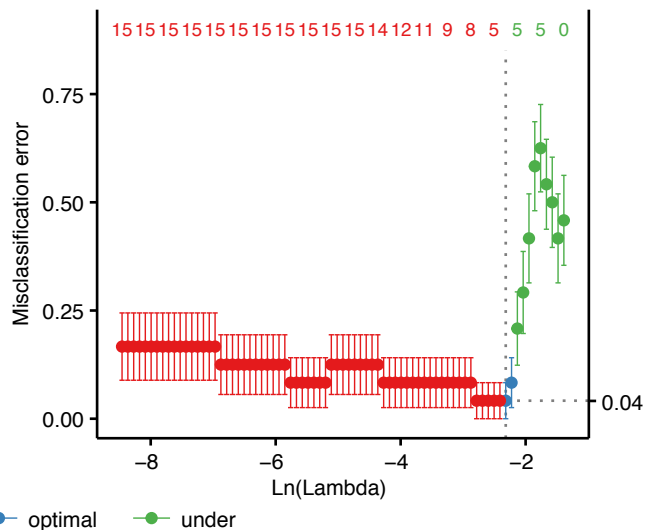

**Figure S6. Model optimization based on vector integration sites from infusion products or day 28 samples.** A total of 91 features (Table S6) spanning population metrics, genomic features, and epigenetic features from 29 patients were used in least absolute shrinkage and selection operator (LASSO) logistic regression to build a classification model. Results from leave-one-out cross-validation of models based on transduction/pre-infusion products (A) and day 28 peripheral blood samples (B). The top horizontal numbers indicate the number of principal components used in the classification model, while the x-axis indicates the lambda constant used for tuning the model, and the y-axis shows misclassification error. Error bars indicated standard error. The minimum value of misclassification is indicated to the right of the plots.

**Figure S7**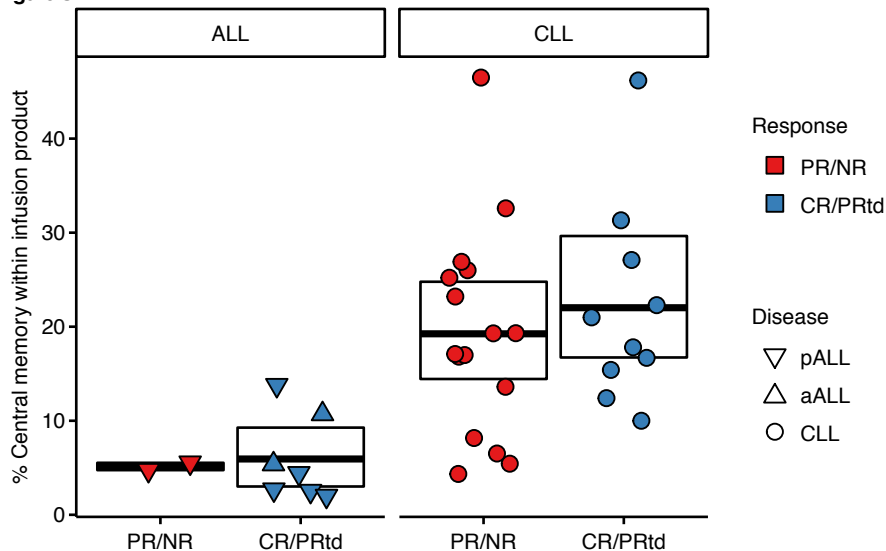

**Figure S7. Central Memory T-cell proportions within Infusion Products.** Proportion of central memory T-cells are shown for infusion products of CLL and ALL patients. Central Memory T-cells frequencies were identified at apheresis by the following markers: CD8+, CCR7+, and CD45RO+. Mean and standard error of the associated data are shown. No significant difference was identified between response groups within ALL or CLL as determined by a two-tailed T-test.

**Figure S8**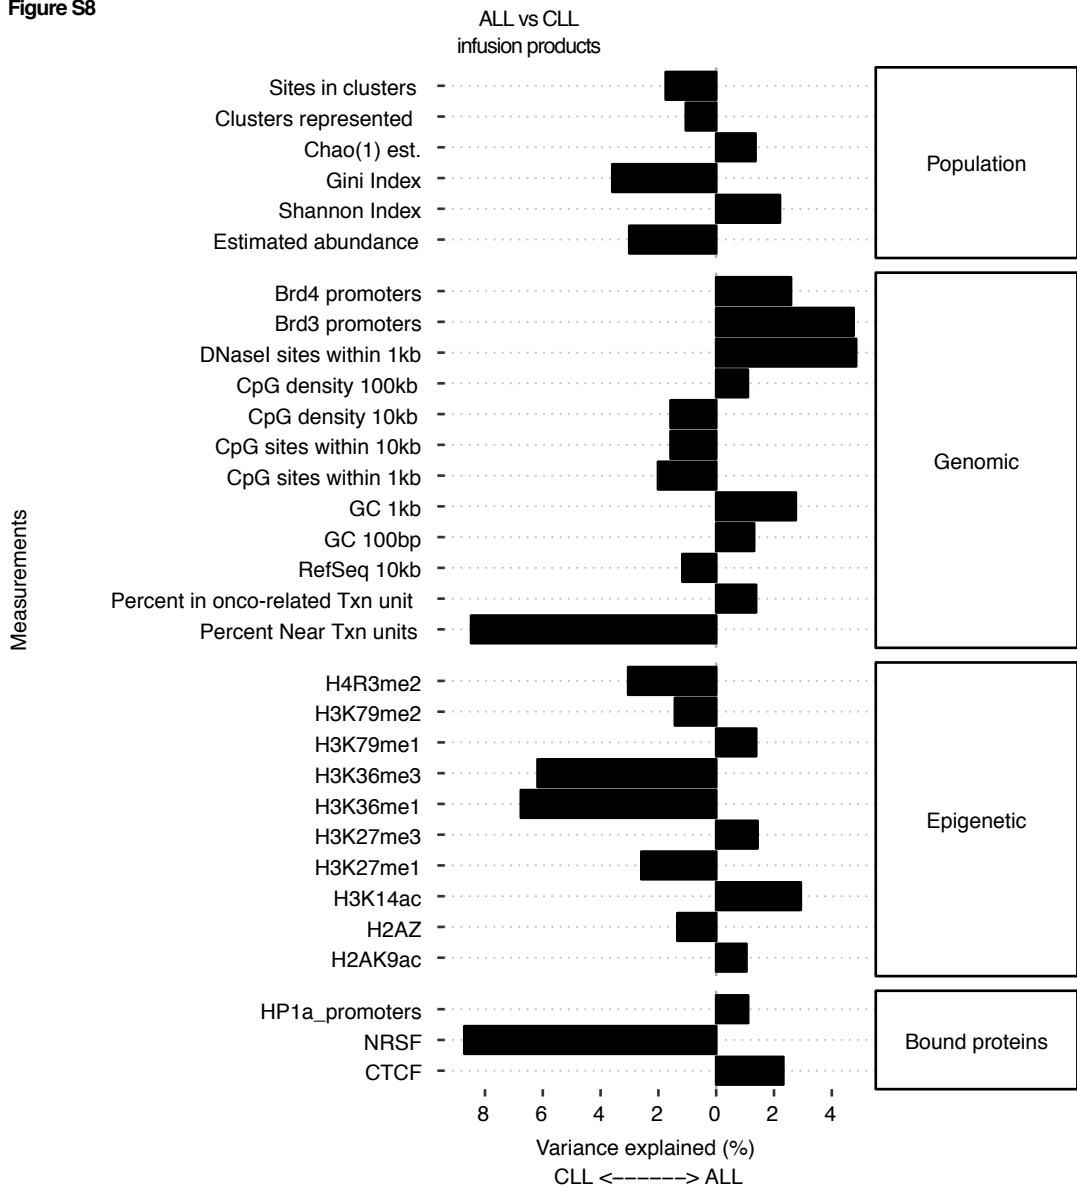

**Figure S8. Disease specific analysis of integration site profiles.** A LASSO regression was used to identify variables within integration site profiles that would separate CLL and ALL patients. Analysis was performed on infusion products, and the percent contribution to the overall variance between the groups is displayed for values greater than 1%.



## Supplemental Tables

### Supplemental Table S1. Patient Information.

Table S1. Patient metadata and results of integration site sequencing.

| Patient ID | Disease | Clin. Trial | Response            | Resp. Class | Reads   | Cells Sampled | Unique Int. Sites |
|------------|---------|-------------|---------------------|-------------|---------|---------------|-------------------|
| p959-100   | pALL    | CHP959      | Complete            | CR/PRtd     | 1929626 | 6832          | 6532              |
| p959-101   | pALL    | CHP959      | Complete w/ relapse | CR/PRtd     | 2161985 | 9088          | 7386              |
| p959-103   | pALL    | CHP959      | None                | PR/NR       | 289620  | 1423          | 1355              |
| p959-107   | pALL    | CHP959      | Complete w/ relapse | CR/PRtd     | 763129  | 11076         | 10325             |
| p959-112   | pALL    | CHP959      | Complete            | CR/PRtd     | 1311546 | 9749          | 9476              |
| p959-117   | pALL    | CHP959      | None                | PR/NR       | 3420512 | 2578          | 2074              |
| p959-133   | pALL    | CHP959      | Complete w/ relapse | CR/PRtd     | 1118577 | 12533         | 12308             |
| p03712-03  | CLL     | UPCC03712   | Complete            | CR/PRtd     | 5722000 | 28632         | 12140             |
| p03712-04  | CLL     | UPCC03712   | Complete            | CR/PRtd     | 1887292 | 3698          | 2474              |
| p03712-06  | CLL     | UPCC03712   | Complete            | CR/PRtd     | 8791604 | 7358          | 5890              |
| p03712-08  | CLL     | UPCC03712   | None                | PR/NR       | 200363  | 497           | 331               |
| p03712-11  | CLL     | UPCC03712   | None                | PR/NR       | 1436827 | 2510          | 1895              |
| p03712-12  | CLL     | UPCC03712   | None                | PR/NR       | 632238  | 1969          | 1373              |
| p03712-14  | CLL     | UPCC03712   | None                | PR/NR       | 85904   | 1034          | 931               |
| p03712-16  | CLL     | UPCC03712   | Partial             | PR/NR       | 2511087 | 2951          | 2616              |
| p03712-17  | CLL     | UPCC03712   | None                | PR/NR       | 97734   | 690           | 568               |
| p03712-18  | CLL     | UPCC03712   | Partial w/ TnDz     | CR/PRtd     | 2391322 | 7596          | 5340              |
| p03712-20  | CLL     | UPCC03712   | None                | PR/NR       | 507722  | 3332          | 2479              |
| p03712-22  | CLL     | UPCC03712   | Partial w/ TnDz     | CR/PRtd     | 1803690 | 2592          | 2066              |
| p03712-25  | CLL     | UPCC03712   | None                | PR/NR       | 820143  | 3409          | 2524              |
| p03712-29  | CLL     | UPCC03712   | Partial             | PR/NR       | 2202312 | 4703          | 4095              |
| p03712-45  | CLL     | UPCC03712   | Complete            | CR/PRtd     | 4296437 | 7404          | 4419              |
| p04409-01  | CLL     | UPCC04409   | Complete            | CR/PRtd     | 4656521 | 11470         | 7104              |
| p04409-02  | CLL     | UPCC04409   | Complete            | CR/PRtd     | 3889474 | 7979          | 2200              |
| p04409-03  | CLL     | UPCC04409   | Partial             | PR/NR       | 1506913 | 3552          | 2973              |
| p04409-05  | CLL     | UPCC04409   | Partial             | PR/NR       | 3349759 | 1566          | 1154              |
| p04409-06  | CLL     | UPCC04409   | None                | PR/NR       | 508559  | 4596          | 4272              |
| p04409-07  | CLL     | UPCC04409   | None                | PR/NR       | 532722  | 2489          | 2345              |
| p04409-09  | CLL     | UPCC04409   | Complete            | CR/PRtd     | 5423944 | 12090         | 8427              |
| p04409-10  | CLL     | UPCC04409   | Complete            | CR/PRtd     | 4519487 | 4109          | 1887              |
| p04409-12  | CLL     | UPCC04409   | Partial             | PR/NR       | 2267562 | 3216          | 2765              |
| p04409-14  | CLL     | UPCC04409   | None                | PR/NR       | 554038  | 763           | 608               |
| p04409-17  | CLL     | UPCC04409   | None                | PR/NR       | 927522  | 2578          | 2110              |
| p04409-18  | CLL     | UPCC04409   | None                | PR/NR       | 148258  | 393           | 275               |
| p04409-22  | CLL     | UPCC04409   | Partial w/ TnDz     | CR/PRtd     | 2413960 | 5755          | 4833              |
| p04409-23  | aALL    | UPCC04409   | Complete            | CR/PRtd     | 203455  | 1587          | 1296              |
| p04409-25  | CLL     | UPCC04409   | None                | PR/NR       | 800419  | 871           | 830               |

(continued)

| Patient ID | Disease | Clin. Trial | Response            | Resp. Class | Reads   | Cells Sampled | Unique Int. Sites |
|------------|---------|-------------|---------------------|-------------|---------|---------------|-------------------|
| p04409-26  | aALL    | UPCC04409   | Complete w/ relapse | CR/PRtd     | 119563  | 982           | 969               |
| p04409-27  | aALL    | UPCC04409   | Complete            | CR/PRtd     | 122586  | 1128          | 1110              |
| p04409-29  | aALL    | UPCC04409   | Complete w/ relapse | CR/PRtd     | 172742  | 1483          | 1459              |
| p18415-01  | CLL     | UPCC18415   | Complete            | CR/PRtd     | 944888  | 1925          | 1812              |
| p18415-02  | CLL     | UPCC18415   | Complete            | CR/PRtd     | 871295  | 1438          | 1351              |
| p18415-03  | CLL     | UPCC18415   | Complete            | CR/PRtd     | 944334  | 2914          | 2815              |
| p18415-04  | CLL     | UPCC18415   | Complete            | CR/PRtd     | 640111  | 3934          | 3833              |
| p18415-05  | CLL     | UPCC18415   | Complete            | CR/PRtd     | 771094  | 1539          | 1447              |
| p18415-06  | CLL     | UPCC18415   | Complete            | CR/PRtd     | 850718  | 2917          | 2803              |
| p18415-07  | CLL     | UPCC18415   | Complete            | CR/PRtd     | 591275  | 2510          | 2436              |
| p18415-08  | CLL     | UPCC18415   | Complete            | CR/PRtd     | 874944  | 3036          | 2890              |
| p18415-09  | CLL     | UPCC18415   | Complete w/ relapse | CR/PRtd     | 918815  | 2335          | 2212              |
| p18415-10  | CLL     | UPCC18415   | Complete            | CR/PRtd     | 948901  | 2311          | 2216              |
| p18415-11  | CLL     | UPCC18415   | Complete            | CR/PRtd     | 1054162 | 3885          | 3721              |
| p18415-12  | CLL     | UPCC18415   | Complete            | CR/PRtd     | 771060  | 2686          | 2543              |
| p18415-13  | CLL     | UPCC18415   | Complete            | CR/PRtd     | 626232  | 3901          | 3809              |
| p18415-15  | CLL     | UPCC18415   | Complete            | CR/PRtd     | 1558046 | 3285          | 2984              |
| p18415-16  | CLL     | UPCC18415   | Complete            | CR/PRtd     | 875474  | 2000          | 1900              |
| p18415-18  | CLL     | UPCC18415   | None                | PR/NR       | 481737  | 3682          | 3593              |
| p18415-19  | CLL     | UPCC18415   | Complete            | CR/PRtd     | 544293  | 4236          | 4160              |
| p18415-20  | CLL     | UPCC18415   | Complete            | CR/PRtd     | 686532  | 4382          | 4232              |

**Supplemental Table S2. Summary of patient ages in the CLL and ALL cohorts.**

Table S2. Summary of patient ages in the CLL and ALL cohorts. We did not observe a significant correlation between age and clinical response within disease groups.

| Disease | Mean | Median | Std. Dev. | Std. Err. | Minimum | Maximum | Count |
|---------|------|--------|-----------|-----------|---------|---------|-------|
| ALL     | 24.3 | 16     | 19.9      | 6.0       | 6       | 60      | 11    |
| CLL     | 63.9 | 62     | 6.9       | 1.3       | 50      | 77      | 29    |

**Supplemental Table S3. Patient DNA samples analyzed by integration site sequencing.**

Table S3. Table of specimens analyzed by vector integration site analysis.

| GTSP ID  | Patient ID | Clin. Trial | Cell Type       | Time Point | Reads   | Cells Sampled | Unique Int. Sites |
|----------|------------|-------------|-----------------|------------|---------|---------------|-------------------|
| GTSP0560 | p04409-10  | UPCC04409   | Tcells:CAR+CD8+ | d121       | 685759  | 920           | 105               |
| GTSP0561 | p04409-01  | UPCC04409   | Tcells:CAR+CD8- | d14        | 732156  | 450           | 338               |
| GTSP0562 | p04409-01  | UPCC04409   | Tcells:CAR+CD8+ | d14        | 609593  | 3552          | 1585              |
| GTSP0563 | p04409-02  | UPCC04409   | Tcells:CAR+CD8- | d28        | 498286  | 1044          | 321               |
| GTSP0564 | p04409-02  | UPCC04409   | Tcells:CAR+CD8+ | d28        | 416315  | 2222          | 237               |
| GTSP0565 | p04409-09  | UPCC04409   | Tcells:CAR+CD8- | d14        | 269567  | 258           | 221               |
| GTSP0566 | p04409-09  | UPCC04409   | Tcells:CAR+CD8+ | d14        | 704330  | 4109          | 3029              |
| GTSP0567 | p03712-03  | UPCC03712   | Tcells:CAR+CD8- | d14        | 341591  | 7878          | 3621              |
| GTSP0568 | p03712-03  | UPCC03712   | Tcells:CAR+CD8+ | d14        | 1891206 | 15778         | 6990              |
| GTSP0569 | p03712-06  | UPCC03712   | Tcells:CAR+CD8- | d14        | 802600  | 444           | 276               |
| GTSP0570 | p03712-06  | UPCC03712   | Tcells:CAR+CD8+ | d14        | 834877  | 2438          | 2095              |
| GTSP0571 | p03712-45  | UPCC03712   | Tcells:CAR+CD8- | d14        | 315375  | 34            | 26                |
| GTSP0572 | p03712-45  | UPCC03712   | Tcells:CAR+CD8+ | d14        | 724342  | 3208          | 1630              |
| GTSP0573 | p03712-03  | UPCC03712   | Tcells          | d0         | 261340  | 748           | 559               |
| GTSP0574 | p03712-03  | UPCC03712   | PBL             | d28        | 143181  | 108           | 72                |
| GTSP0575 | p03712-04  | UPCC03712   | Tcells          | d0         | 412136  | 2052          | 1547              |
| GTSP0576 | p03712-04  | UPCC03712   | PBL             | d28        | 60461   | 174           | 107               |
| GTSP0577 | p03712-06  | UPCC03712   | Tcells          | d0         | 75761   | 1101          | 1084              |
| GTSP0578 | p03712-06  | UPCC03712   | PBL             | d28        | 91347   | 166           | 157               |
| GTSP0579 | p03712-08  | UPCC03712   | Tcells          | d0         | 200362  | 496           | 330               |
| GTSP0580 | p03712-08  | UPCC03712   | PBL             | d28        | 1       | 1             | 1                 |
| GTSP0581 | p03712-11  | UPCC03712   | Tcells          | d0         | 316702  | 2011          | 1621              |
| GTSP0582 | p03712-11  | UPCC03712   | PBL             | d21        | 158508  | 18            | 5                 |
| GTSP0583 | p03712-11  | UPCC03712   | PBL             | d23        | 398869  | 223           | 177               |
| GTSP0584 | p03712-11  | UPCC03712   | PBL             | d25        | 502693  | 170           | 56                |
| GTSP0585 | p03712-11  | UPCC03712   | PBL             | d28        | 40148   | 83            | 45                |
| GTSP0586 | p03712-11  | UPCC03712   | PBL             | d36        | 19907   | 5             | 5                 |
| GTSP0587 | p03712-12  | UPCC03712   | Tcells          | d0         | 631320  | 1950          | 1358              |
| GTSP0588 | p03712-12  | UPCC03712   | PBL             | d28        | 918     | 19            | 15                |
| GTSP0589 | p03712-14  | UPCC03712   | Tcells          | d0         | 82386   | 986           | 886               |
| GTSP0590 | p03712-14  | UPCC03712   | PBL             | d28        | 3518    | 48            | 45                |
| GTSP0591 | p03712-16  | UPCC03712   | Tcells          | d0         | 83471   | 879           | 865               |
| GTSP0592 | p03712-16  | UPCC03712   | PBL             | d28        | 197785  | 230           | 202               |
| GTSP0593 | p03712-17  | UPCC03712   | Tcells          | d0         | 97323   | 661           | 540               |
| GTSP0594 | p03712-17  | UPCC03712   | PBL             | d28        | 411     | 29            | 28                |
| GTSP0595 | p03712-18  | UPCC03712   | Tcells          | d0         | 120382  | 602           | 588               |
| GTSP0596 | p03712-18  | UPCC03712   | PBL             | d28        | 105352  | 362           | 292               |

(continued)

| GTSP ID  | Patient ID | Clin. Trial | Cell Type | Time Point | Reads   | Cells Sampled | Unique Int. | Sites |
|----------|------------|-------------|-----------|------------|---------|---------------|-------------|-------|
| GTSP0597 | p03712-20  | UPCC03712   | Tcells    | d0         | 507625  | 3305          |             | 2452  |
| GTSP0598 | p03712-20  | UPCC03712   | PBL       | d28        | 97      | 27            |             | 27    |
| GTSP0599 | p03712-22  | UPCC03712   | Tcells    | d0         | 280944  | 2013          |             | 1580  |
| GTSP0600 | p03712-22  | UPCC03712   | PBL       | d28        | 5080    | 31            |             | 29    |
| GTSP0601 | p03712-25  | UPCC03712   | Tcells    | d0         | 819562  | 3387          |             | 2510  |
| GTSP0602 | p03712-25  | UPCC03712   | PBL       | d28        | 581     | 22            |             | 14    |
| GTSP0603 | p04409-09  | UPCC04409   | Tcells    | d0         | 1304491 | 4140          |             | 2777  |
| GTSP0604 | p04409-09  | UPCC04409   | PBL       | d28        | 714619  | 1289          |             | 857   |
| GTSP0605 | p04409-10  | UPCC04409   | Tcells    | d0         | 328324  | 1381          |             | 1076  |
| GTSP0606 | p04409-10  | UPCC04409   | PBL       | d10        | 1371    | 18            |             | 15    |
| GTSP0607 | p04409-10  | UPCC04409   | PBL       | d28        | 285     | 7             |             | 6     |
| GTSP0608 | p04409-10  | UPCC04409   | PBL       | d120       | 52261   | 113           |             | 17    |
| GTSP0609 | p04409-10  | UPCC04409   | PBL       | d204       | 23391   | 54            |             | 10    |
| GTSP0610 | p04409-10  | UPCC04409   | PBL       | d442       | 1892    | 14            |             | 9     |
| GTSP0611 | p04409-10  | UPCC04409   | PBL       | d801       | 21      | 8             |             | 8     |
| GTSP0613 | p04409-12  | UPCC04409   | PBL       | d28        | 102039  | 390           |             | 334   |
| GTSP0614 | p04409-17  | UPCC04409   | Tcells    | d0         | 309822  | 2089          |             | 1715  |
| GTSP0615 | p04409-17  | UPCC04409   | PBL       | d28        | 847     | 25            |             | 25    |
| GTSP0616 | p04409-18  | UPCC04409   | Tcells    | d0         | 146580  | 364           |             | 257   |
| GTSP0617 | p04409-18  | UPCC04409   | PBL       | d28        | 1676    | 27            |             | 16    |
| GTSP0619 | p04409-22  | UPCC04409   | PBL       | d28        | 107564  | 197           |             | 187   |
| GTSP0620 | p04409-23  | UPCC04409   | Tcells    | d0         | 201134  | 1553          |             | 1270  |
| GTSP0621 | p04409-23  | UPCC04409   | PBL       | d28        | 2321    | 34            |             | 26    |
| GTSP0624 | p04409-26  | UPCC04409   | Tcells    | d0         | 100927  | 975           |             | 963   |
| GTSP0625 | p04409-26  | UPCC04409   | PBL       | d28        | 18636   | 7             |             | 6     |
| GTSP0626 | p04409-27  | UPCC04409   | Tcells    | d0         | 75831   | 1122          |             | 1106  |
| GTSP0627 | p04409-27  | UPCC04409   | PBL       | d28        | 46755   | 6             |             | 4     |
| GTSP0628 | p04409-29  | UPCC04409   | Tcells    | d0         | 88354   | 203           |             | 194   |
| GTSP0629 | p04409-29  | UPCC04409   | PBL       | d28        | 84388   | 1280          |             | 1265  |
| GTSP0630 | p959-100   | CHP959      | Tcells    | d0         | 97109   | 187           |             | 167   |
| GTSP0631 | p959-100   | CHP959      | PBL       | d13        | 824668  | 1072          |             | 971   |
| GTSP0632 | p959-100   | CHP959      | PBL       | d15        | 829124  | 887           |             | 784   |
| GTSP0633 | p959-100   | CHP959      | PBL       | d28        | 2374    | 121           |             | 121   |
| GTSP0634 | p959-103   | CHP959      | Tcells    | d0         | 186658  | 1356          |             | 1308  |
| GTSP0635 | p959-103   | CHP959      | PBL       | d14        | 102426  | 66            |             | 46    |
| GTSP0636 | p959-103   | CHP959      | PBL       | d28        | 536     | 1             |             | 1     |

(continued)

| GTSP ID  | Patient ID | Clin. Trial | Cell Type   | Time Point | Reads   | Cells Sampled | Unique Int. Sites |
|----------|------------|-------------|-------------|------------|---------|---------------|-------------------|
| GTSP0638 | p959-107   | CHP959      | PBL         | d14        | 64690   | 47            | 40                |
| GTSP0639 | p959-107   | CHP959      | PBL         | d28        | 40270   | 25            | 12                |
| GTSP0640 | p959-117   | CHP959      | Tcells      | d0         | 870169  | 1390          | 1163              |
| GTSP0641 | p959-117   | CHP959      | PBL         | d14        | 764624  | 693           | 572               |
| GTSP0642 | p959-117   | CHP959      | PBL         | d25        | 847373  | 184           | 156               |
| GTSP0643 | p959-100   | CHP959      | Tcells:CAR+ | d0         | 176351  | 4565          | 4492              |
| GTSP0644 | p959-101   | CHP959      | Tcells:CAR+ | d0         | 180832  | 3299          | 3213              |
| GTSP0645 | p959-101   | CHP959      | Tcells      | d0         | 1015501 | 5476          | 3954              |
| GTSP0646 | p959-101   | CHP959      | PBL         | m2         | 899     | 11            | 9                 |
| GTSP0647 | p959-107   | CHP959      | Tcells:CAR+ | d0         | 416274  | 7613          | 7095              |
| GTSP0648 | p959-107   | CHP959      | Tcells      | d0         | 239525  | 3252          | 3051              |
| GTSP0649 | p959-107   | CHP959      | BM:CAR+     | m9         | 170     | 34            | 34                |
| GTSP0650 | p959-107   | CHP959      | BM          | m9         | 176     | 43            | 41                |
| GTSP0651 | p959-107   | CHP959      | PBL         | m20        | 2024    | 62            | 59                |
| GTSP0652 | p959-112   | CHP959      | Tcells:CAR+ | d0         | 232831  | 5341          | 5238              |
| GTSP0653 | p959-112   | CHP959      | Tcells      | d0         | 206973  | 4248          | 4137              |
| GTSP0654 | p959-133   | CHP959      | Tcells:CAR+ | d0         | 156806  | 6156          | 6065              |
| GTSP0655 | p959-133   | CHP959      | Tcells      | d0         | 147520  | 6212          | 6150              |
| GTSP0734 | p04409-01  | UPCC04409   | PBL         | d13        | 751709  | 2770          | 1354              |
| GTSP0735 | p04409-02  | UPCC04409   | PBL         | d28        | 643993  | 954           | 213               |
| GTSP0736 | p04409-03  | UPCC04409   | PBL         | d11        | 62603   | 31            | 26                |
| GTSP0737 | p04409-05  | UPCC04409   | Tcells      | d0         | 893878  | 945           | 845               |
| GTSP0738 | p04409-05  | UPCC04409   | PBL         | d17        | 752836  | 277           | 136               |
| GTSP0739 | p04409-06  | UPCC04409   | Tcells      | d0         | 508559  | 4596          | 4272              |
| GTSP0741 | p04409-07  | UPCC04409   | Tcells      | d0         | 438594  | 2468          | 2333              |
| GTSP0742 | p04409-07  | UPCC04409   | PBL         | d1         | 76316   | 13            | 8                 |
| GTSP0744 | p04409-09  | UPCC04409   | PBL         | d10        | 437746  | 1396          | 1125              |
| GTSP0746 | p04409-10  | UPCC04409   | PBL         | d121       | 138379  | 362           | 4                 |
| GTSP0747 | p04409-12  | UPCC04409   | Tcells      | d0         | 68770   | 1180          | 1171              |
| GTSP0748 | p04409-12  | UPCC04409   | PBL         | d14        | 804839  | 1347          | 1120              |
| GTSP0749 | p04409-14  | UPCC04409   | Tcells      | d0         | 502045  | 759           | 605               |
| GTSP0750 | p04409-14  | UPCC04409   | PBL         | d14        | 51993   | 4             | 3                 |
| GTSP0752 | p04409-17  | UPCC04409   | PBL         | d10        | 616853  | 464           | 370               |
| GTSP0754 | p04409-18  | UPCC04409   | PBL         | d1         | 2       | 2             | 2                 |
| GTSP0755 | p04409-22  | UPCC04409   | Tcells      | d0         | 83535   | 1043          | 1028              |
| GTSP0757 | p04409-25  | UPCC04409   | Tcells      | d0         | 80342   | 589           | 581               |



(continued)

| GTSP ID  | Patient ID | Clin. Trial | Cell Type | Time Point | Reads  | Cells Sampled | Unique Int. Sites |
|----------|------------|-------------|-----------|------------|--------|---------------|-------------------|
| GTSP0758 | p04409-25  | UPCC04409   | PBL       | d14        | 720077 | 282           | 250               |
| GTSP1166 | p04409-02  | UPCC04409   | PBL       | m6         | 539335 | 158           | 71                |
| GTSP1167 | p04409-02  | UPCC04409   | PBL       | m12        | 321638 | 54            | 17                |
| GTSP1173 | p04409-02  | UPCC04409   | Tcells    | d0         | 245654 | 1242          | 1216              |
| GTSP1175 | p04409-05  | UPCC04409   | PBL       | d21        | 694693 | 232           | 157               |
| GTSP1177 | p04409-09  | UPCC04409   | PBL       | m9         | 26664  | 22            | 20                |
| GTSP1178 | p04409-09  | UPCC04409   | PBL       | m12        | 676120 | 139           | 35                |
| GTSP1180 | p04409-12  | UPCC04409   | PBL       | d9         | 510064 | 130           | 102               |
| GTSP1183 | p04409-12  | UPCC04409   | PBL       | m2         | 781850 | 169           | 133               |
| GTSP1187 | p04409-22  | UPCC04409   | PBL       | d10        | 272730 | 212           | 164               |
| GTSP1188 | p04409-22  | UPCC04409   | PBL       | d14        | 631464 | 3762          | 3112              |
| GTSP1190 | p04409-22  | UPCC04409   | PBL       | m2         | 529828 | 276           | 223               |
| GTSP1191 | p04409-22  | UPCC04409   | PBL       | m3         | 650179 | 165           | 104               |
| GTSP1192 | p04409-22  | UPCC04409   | PBL       | m4         | 137375 | 78            | 63                |
| GTSP1193 | p04409-22  | UPCC04409   | PBL       | m5         | 1285   | 22            | 22                |
| GTSP1196 | p04409-01  | UPCC04409   | Tcells    | d0         | 579187 | 3539          | 3378              |
| GTSP1197 | p04409-01  | UPCC04409   | PBL       | m9         | 445150 | 457           | 371               |
| GTSP1198 | p04409-01  | UPCC04409   | PBL       | m12        | 712135 | 91            | 55                |
| GTSP1203 | p03712-03  | UPCC03712   | PBL       | d14        | 826260 | 2262          | 1576              |
| GTSP1204 | p03712-03  | UPCC03712   | PBL       | d21        | 967241 | 1164          | 690               |
| GTSP1206 | p03712-04  | UPCC03712   | PBL       | d14        | 803350 | 376           | 286               |
| GTSP1207 | p03712-04  | UPCC03712   | PBL       | d21        | 611345 | 1096          | 595               |
| GTSP1209 | p03712-22  | UPCC03712   | PBL       | d10        | 843793 | 295           | 257               |
| GTSP1210 | p03712-22  | UPCC03712   | PBL       | d14        | 673873 | 253           | 203               |
| GTSP1211 | p03712-45  | UPCC03712   | Tcells    | d0         | 860010 | 2334          | 2171              |
| GTSP1212 | p03712-45  | UPCC03712   | PBL       | d14        | 758985 | 956           | 536               |
| GTSP1213 | p03712-45  | UPCC03712   | PBL       | d21        | 766176 | 439           | 223               |
| GTSP1215 | p03712-16  | UPCC03712   | PBL       | d10        | 757798 | 308           | 267               |
| GTSP1216 | p03712-16  | UPCC03712   | PBL       | d14        | 708497 | 1146          | 1036              |
| GTSP1219 | p03712-18  | UPCC03712   | PBL       | d14        | 635449 | 2823          | 2544              |
| GTSP1220 | p03712-18  | UPCC03712   | PBL       | d21        | 623823 | 3760          | 2254              |
| GTSP1222 | p03712-29  | UPCC03712   | Tcells    | d0         | 772885 | 3597          | 3313              |
| GTSP1223 | p03712-29  | UPCC03712   | PBL       | d14        | 711525 | 331           | 233               |
| GTSP1224 | p03712-29  | UPCC03712   | PBL       | d28        | 717902 | 775           | 577               |
| GTSP1225 | p04409-01  | UPCC04409   | PBL       | m2         | 230    | 12            | 12                |
| GTSP1226 | p04409-01  | UPCC04409   | PBL       | m3         | 813608 | 563           | 517               |

(continued)

| GTSP ID  | Patient ID | Clin. Trial | Cell Type | Time Point | Reads   | Cells Sampled | Unique Int. Sites |
|----------|------------|-------------|-----------|------------|---------|---------------|-------------------|
| GTSP1228 | p04409-02  | UPCC04409   | PBL       | d50        | 402159  | 2183          | 397               |
| GTSP1229 | p04409-02  | UPCC04409   | PBL       | m5         | 822094  | 122           | 33                |
| GTSP1232 | p04409-09  | UPCC04409   | PBL       | m2         | 572716  | 435           | 337               |
| GTSP1233 | p04409-09  | UPCC04409   | PBL       | m5         | 599535  | 280           | 240               |
| GTSP1234 | p04409-09  | UPCC04409   | PBL       | m6         | 118156  | 22            | 18                |
| GTSP1235 | p03712-03  | UPCC03712   | PBL       | m2         | 717287  | 413           | 273               |
| GTSP1236 | p03712-03  | UPCC03712   | PBL       | m4         | 573894  | 281           | 215               |
| GTSP1238 | p03712-06  | UPCC03712   | PBL       | d14        | 879621  | 1178          | 938               |
| GTSP1240 | p03712-16  | UPCC03712   | PBL       | m2         | 763536  | 388           | 287               |
| GTSP1241 | p03712-18  | UPCC03712   | PBL       | m2         | 906316  | 49            | 32                |
| GTSP1405 | p03712-45  | UPCC03712   | PBL       | d28        | 871549  | 433           | 227               |
| GTSP1406 | p04409-01  | UPCC04409   | PBL       | d28        | 12753   | 36            | 35                |
| GTSP1407 | p04409-03  | UPCC04409   | Tcells    | d0         | 1115510 | 2733          | 2186              |
| GTSP1408 | p04409-03  | UPCC04409   | PBL       | d28        | 328800  | 788           | 761               |
| GTSP1409 | p04409-05  | UPCC04409   | PBL       | d28        | 1008352 | 112           | 53                |
| GTSP1411 | p04409-07  | UPCC04409   | PBL       | d28        | 17812   | 8             | 5                 |
| GTSP1413 | p959-101   | CHP959      | PBL       | d28        | 964753  | 302           | 213               |
| GTSP1414 | p959-112   | CHP959      | PBL       | d28        | 871742  | 160           | 104               |
| GTSP1415 | p959-117   | CHP959      | PBL       | d25        | 938346  | 311           | 193               |
| GTSP1416 | p959-133   | CHP959      | PBL       | d28        | 814251  | 165           | 106               |
| GTSP1603 | p04409-10  | UPCC04409   | PBL       | d28        | 465128  | 455           | 396               |
| GTSP1604 | p04409-10  | UPCC04409   | PBL       | d63        | 865690  | 143           | 88                |
| GTSP1605 | p04409-10  | UPCC04409   | PBL       | d92        | 33434   | 17            | 14                |
| GTSP1606 | p04409-10  | UPCC04409   | PBL       | d147       | 735867  | 397           | 27                |
| GTSP1607 | p04409-10  | UPCC04409   | PBL       | d442       | 306698  | 80            | 42                |
| GTSP1608 | p04409-10  | UPCC04409   | PBL       | d801       | 646210  | 92            | 54                |
| GTSP1609 | p04409-10  | UPCC04409   | PBL       | d1584      | 234777  | 48            | 28                |
| GTSP2275 | p03712-06  | UPCC03712   | BM        | d28        | 585462  | 299           | 244               |
| GTSP2276 | p03712-06  | UPCC03712   | PBL       | m6         | 521819  | 322           | 276               |
| GTSP2277 | p03712-06  | UPCC03712   | PBL       | m9         | 632212  | 139           | 101               |
| GTSP2278 | p03712-06  | UPCC03712   | BM        | m9         | 643889  | 121           | 76                |
| GTSP2279 | p03712-06  | UPCC03712   | PBL       | m12        | 485129  | 200           | 159               |
| GTSP2280 | p03712-06  | UPCC03712   | BM        | m12        | 340995  | 232           | 200               |
| GTSP2281 | p03712-06  | UPCC03712   | PBL       | y1.5       | 584295  | 347           | 220               |
| GTSP2282 | p03712-06  | UPCC03712   | PBL       | y1.5       | 697221  | 69            | 34                |
| GTSP2283 | p03712-06  | UPCC03712   | PBL       | y2.5       | 497894  | 114           | 52                |

(continued)

| GTSP ID  | Patient ID | Clin. Trial | Cell Type | Time Point | Reads   | Cells Sampled | Unique Int. Sites |
|----------|------------|-------------|-----------|------------|---------|---------------|-------------------|
| GTSP2284 | p03712-06  | UPCC03712   | PBL       | y3         | 537768  | 149           | 93                |
| GTSP2285 | p03712-06  | UPCC03712   | PBL       | y5         | 580714  | 39            | 20                |
| GTSP2648 | p18415-01  | UPCC18415   | Tcells    | d0         | 944888  | 1925          | 1812              |
| GTSP2649 | p18415-02  | UPCC18415   | Tcells    | d0         | 871295  | 1438          | 1351              |
| GTSP2650 | p18415-03  | UPCC18415   | Tcells    | d0         | 944334  | 2914          | 2815              |
| GTSP2651 | p18415-04  | UPCC18415   | Tcells    | d0         | 640111  | 3934          | 3833              |
| GTSP2652 | p18415-05  | UPCC18415   | Tcells    | d0         | 771094  | 1539          | 1447              |
| GTSP2653 | p18415-06  | UPCC18415   | Tcells    | d0         | 850718  | 2917          | 2803              |
| GTSP2654 | p18415-07  | UPCC18415   | Tcells    | d0         | 591275  | 2510          | 2436              |
| GTSP2655 | p18415-08  | UPCC18415   | Tcells    | d0         | 874944  | 3036          | 2890              |
| GTSP2656 | p18415-09  | UPCC18415   | Tcells    | d0         | 918815  | 2335          | 2212              |
| GTSP2657 | p18415-10  | UPCC18415   | Tcells    | d0         | 948901  | 2311          | 2216              |
| GTSP2658 | p18415-11  | UPCC18415   | Tcells    | d0         | 1054162 | 3885          | 3721              |
| GTSP2659 | p18415-12  | UPCC18415   | Tcells    | d0         | 771060  | 2686          | 2543              |
| GTSP2660 | p18415-13  | UPCC18415   | Tcells    | d0         | 626232  | 3901          | 3809              |
| GTSP2661 | p18415-15  | UPCC18415   | Tcells    | d0         | 1558046 | 3285          | 2984              |
| GTSP2662 | p18415-16  | UPCC18415   | Tcells    | d0         | 875474  | 2000          | 1900              |
| GTSP2664 | p18415-18  | UPCC18415   | Tcells    | d0         | 481737  | 3682          | 3593              |
| GTSP2665 | p18415-19  | UPCC18415   | Tcells    | d0         | 544293  | 4236          | 4160              |
| GTSP2666 | p18415-20  | UPCC18415   | Tcells    | d0         | 686532  | 4382          | 4232              |

**Supplemental Table S4. Cancer-associated gene lists.**

Table S4. Gene sets used for analysis, including cancer associated genes, human lymphoid cancer genes, and genes associated with clonal hematopoiesis, and overlaps between lists. Origins of gene lists are as follows: Bushman Lab allOnco List: (Sadelain et al., 2011, <http://www.bushmanlab.org/links/genelists>); Lymphoid cancer list: (personal communication, Marina Cavazzana, <http://www.bushmanlab.org/links/genelists>); COSMIC: (Sondka, Z. et al. 2018 Nature Cancer Reviews), TCGA\_Xie and Clonal\_Hema\_Xie (Xie, M. et al. 2014 Nature Medicine).

| List               | Size | allOnco | TSGene | humanLymph | COSMIC-CGC | TCGA List | PMID           |
|--------------------|------|---------|--------|------------|------------|-----------|----------------|
| allOnco (v3, 2017) | 2027 |         |        |            |            |           | 22129804       |
| TSGene (v2, 2016)  | 1217 | 408     |        |            |            |           | 26590405       |
| humanLymph         | 38   | 38      | 8      |            |            |           | personal corr. |
| COSMIC-CGC (v89)   | 723  | 560     | 179    | 34         |            |           | 30293088       |
| TCGA List          | 556  | 311     | 146    | 12         | 289        |           | 25326804       |
| Clonal Hema.       | 30   | 19      | 12     | 1          | 18         | 30        | 25326804       |

**Supplemental Table S5. Statistical analysis of overlaps among genes called at integration sites and cancer associated gene lists.**

Table S5. Statistical analysis of overlaps among genes called at integration sites and cancer associated gene lists in Table S4.

| Criteria     | Size | allOnco (v3, 2017) | TSGene (v2, 2016) | humanLymph | COSMIC-CGC (v89) | TCGA List   | Clonal Hema. |
|--------------|------|--------------------|-------------------|------------|------------------|-------------|--------------|
| Enrichment   | 102  | 0.001 (20)*        | 0.001 (14)*       | 1.000 (0)  | 0.012 (9)*       | 0.001 (10)* | 0.191 (1)    |
| Depletion    | 98   | 0.003 (19)*        | 0.030 (10)*       | 1.000 (0)  | 0.180 (6)        | 0.014 (8)*  | 0.184 (1)    |
| Abundance    | 127  | 0.000 (27)*        | 0.444 (7)         | 1.000 (0)  | 0.013 (11)*      | 0.245 (6)   | 0.292 (1)    |
| Longitudinal | 230  | 0.000 (57)*        | 0.000 (27)*       | 0.306 (1)  | 0.000 (27)*      | 0.000 (26)* | 0.008 (3)*   |
| Composite    | 399  | 0.000 (84)*        | 0.000 (38)*       | 0.471 (1)  | 0.000 (41)*      | 0.000 (36)* | 0.035 (3)*   |

**Supplemental Table S6. Table of model variables**

Table S6. 91 model variables used in the LASSO regression analysis.

| Group      | Abbv.               | Description                                                                   | Size (Kb) | Source               |
|------------|---------------------|-------------------------------------------------------------------------------|-----------|----------------------|
| Population | numUniqSites        | Unique Sites                                                                  | NA        | Calculated           |
| Population | estAbund            | Mean Estimated Abundance                                                      | NA        | Calculated           |
| Population | relAbund            | Mean Relative Abundance                                                       | NA        | Calculated           |
| Population | ShannonIndex        | Shannon Index                                                                 | NA        | Calculated           |
| Population | GiniIndex           | Gini Index                                                                    | NA        | Calculated           |
| Population | Chao1               | Chao 1 Estimate                                                               | NA        | Calculated           |
| Population | UC50                | UC50 - Minimal number of unique clones making up 50% of the overall abundance | NA        | Calculated           |
| Population | clustersRepresented | Integration sites clusters represented within the specimens                   | NA        | Calculated           |
| Population | numSitesInClusters  | Number of sites within clusters                                               | NA        | Calculated           |
| Population | abundInClusters     | Abundance of clones found within clusters                                     | NA        | Calculated           |
| Genomic    | pctTxnUnit          | Percent of clones within Transcription Units                                  | NA        | RefSeq-NCBI          |
| Genomic    | pctSameOrt          | Percent of clones in same orientation as gene transcription                   | NA        | RefSeq-NCBI          |
| Genomic    | pctNearTxnUn        | Percent of clones near transcription units                                    | NA        | RefSeq-NCBI          |
| Genomic    | pctInOnco           | Percent clones within transcription units of onco-related genes               | NA        | Bushman Lab          |
| Genomic    | refSeq_counts.10k   | RefSeq Genes within X window                                                  | 10.0      | RefSeq-NCBI          |
| Genomic    | refSeq_counts.100k  | RefSeq Genes within X window                                                  | 100.0     | RefSeq-NCBI          |
| Genomic    | refSeq_counts.1M    | RefSeq Genes within X window                                                  | 1000.0    | RefSeq-NCBI          |
| Genomic    | GC.100              | GC Percent within X window                                                    | 0.1       | Calculated           |
| Genomic    | GC.1k               | GC Percent within X window                                                    | 1.0       | Calculated           |
| Genomic    | GC.10k              | GC Percent within X window                                                    | 10.0      | Calculated           |
| Genomic    | GC.100k             | GC Percent within X window                                                    | 100.0     | Calculated           |
| Genomic    | GC.1M               | GC Percent within X window                                                    | 1000.0    | Calculated           |
| Genomic    | CpG_counts.1k       | CpG counts within X window                                                    | 1.0       | Calculated           |
| Genomic    | CpG_counts.10k      | CpG counts within X window                                                    | 10.0      | Calculated           |
| Genomic    | CpG_density.10k     | CpG Density within X window                                                   | 10.0      | Calculated           |
| Genomic    | CpG_density.100k    | CpG Density within X window                                                   | 100.0     | Calculated           |
| Genomic    | CpG_density.1M      | CpG Density within X window                                                   | 1000.0    | Calculated           |
| Genomic    | DNaseI_count.1k     | DNaseI counts within X window                                                 | 1.0       | UCSC                 |
| Genomic    | DNaseI_count.10k    | DNaseI counts within X window                                                 | 10.0      | UCSC                 |
| Genomic    | DNaseI_count.100k   | DNaseI counts within X window                                                 | 100.0     | UCSC                 |
| Genomic    | DNaseI_count.1M     | DNaseI counts within X window                                                 | 1000.0    | UCSC                 |
| Epigenetic | H2AK5ac.10k         | H2AK5ac counts within X window                                                | 10.0      | UCSC - hg18 LiftOver |
| Epigenetic | H2AK9ac.10k         | H2AK9ac counts within X window                                                | 10.0      | UCSC - hg18 LiftOver |
| Epigenetic | H2AZ.10k            | H2AZ counts within X window                                                   | 10.0      | UCSC - hg18 LiftOver |
| Epigenetic | H2BK120ac.10k       | H2BK120ac counts within X window                                              | 10.0      | UCSC - hg18 LiftOver |
| Epigenetic | H2BK12ac.10k        | H2BK12ac counts within X window                                               | 10.0      | UCSC - hg18 LiftOver |
| Epigenetic | H2BK20ac.10k        | H2BK20ac counts within X window                                               | 10.0      | UCSC - hg18 LiftOver |
| Epigenetic | H2BK5ac.10k         | H2BK5ac counts within X window                                                | 10.0      | UCSC - hg18 LiftOver |
| Epigenetic | H2BK5me1.10k        | H2BK5me1 counts within X window                                               | 10.0      | UCSC - hg18 LiftOver |
| Epigenetic | H3K14ac.10k         | H3K14ac counts within X window                                                | 10.0      | UCSC - hg18 LiftOver |
| Epigenetic | H3K18ac.10k         | H3K18ac counts within X window                                                | 10.0      | UCSC - hg18 LiftOver |
| Epigenetic | H3K23ac.10k         | H3K23ac counts within X window                                                | 10.0      | UCSC - hg18 LiftOver |
| Epigenetic | H3K27ac.10k         | H3K27ac counts within X window                                                | 10.0      | UCSC - hg18 LiftOver |
| Epigenetic | H3K27me1.10k        | H3K27me1 counts within X window                                               | 10.0      | UCSC - hg18 LiftOver |
| Epigenetic | H3K27me2.10k        | H3K27me2 counts within X window                                               | 10.0      | UCSC - hg18 LiftOver |
| Epigenetic | H3K27me3.10k        | H3K27me3 counts within X window                                               | 10.0      | UCSC - hg18 LiftOver |

(continued)

| Group          | Abbv.                    | Description                                           | Size (Kb) | Source               |
|----------------|--------------------------|-------------------------------------------------------|-----------|----------------------|
| Epigenetic     | H3K36ac.10k              | H3K36ac counts within X window                        | 10.0      | UCSC - hg18 LiftOver |
| Epigenetic     | H3K36me1.10k             | H3K36me1 counts within X window                       | 10.0      | UCSC - hg18 LiftOver |
| Epigenetic     | H3K36me3.10k             | H3K36me3 counts within X window                       | 10.0      | UCSC - hg18 LiftOver |
| Epigenetic     | H3K4ac.10k               | H3K4ac counts within X window                         | 10.0      | UCSC - hg18 LiftOver |
| Epigenetic     | H3K4me1.10k              | H3K4me1 counts within X window                        | 10.0      | UCSC - hg18 LiftOver |
| Epigenetic     | H3K4me2.10k              | H3K4me2 counts within X window                        | 10.0      | UCSC - hg18 LiftOver |
| Epigenetic     | H3K4me3.10k              | H3K4me3 counts within X window                        | 10.0      | UCSC - hg18 LiftOver |
| Epigenetic     | H3K79me1.10k             | H3K79me1 counts within X window                       | 10.0      | UCSC - hg18 LiftOver |
| Epigenetic     | H3K79me2.10k             | H3K79me2 counts within X window                       | 10.0      | UCSC - hg18 LiftOver |
| Epigenetic     | H3K79me3.10k             | H3K79me3 counts within X window                       | 10.0      | UCSC - hg18 LiftOver |
| Epigenetic     | H3K9ac.10k               | H3K9ac counts within X window                         | 10.0      | UCSC - hg18 LiftOver |
| Epigenetic     | H3K9me1.10k              | H3K9me1 counts within X window                        | 10.0      | UCSC - hg18 LiftOver |
| Epigenetic     | H3K9me2.10k              | H3K9me2 counts within X window                        | 10.0      | UCSC - hg18 LiftOver |
| Epigenetic     | H3K9me3.10k              | H3K9me3 counts within X window                        | 10.0      | UCSC - hg18 LiftOver |
| Epigenetic     | H3R2me1.10k              | H3R2me1 counts within X window                        | 10.0      | UCSC - hg18 LiftOver |
| Epigenetic     | H3R2me2.10k              | H3R2me2 counts within X window                        | 10.0      | UCSC - hg18 LiftOver |
| Epigenetic     | H4K12ac.10k              | H4K12ac counts within X window                        | 10.0      | UCSC - hg18 LiftOver |
| Epigenetic     | H4K16ac.10k              | H4K16ac counts within X window                        | 10.0      | UCSC - hg18 LiftOver |
| Epigenetic     | H4K20me1.10k             | H4K20me1 counts within X window                       | 10.0      | UCSC - hg18 LiftOver |
| Epigenetic     | H4K20me3.10k             | H4K20me3 counts within X window                       | 10.0      | UCSC - hg18 LiftOver |
| Epigenetic     | H4K5ac.10k               | H4K5ac counts within X window                         | 10.0      | UCSC - hg18 LiftOver |
| Epigenetic     | H4K8ac.10k               | H4K8ac counts within X window                         | 10.0      | UCSC - hg18 LiftOver |
| Epigenetic     | H4K91ac.10k              | H4K91ac counts within X window                        | 10.0      | UCSC - hg18 LiftOver |
| Epigenetic     | H4R3me2.10k              | H4R3me2 counts within X window                        | 10.0      | UCSC - hg18 LiftOver |
| Bound Proteins | CTCF.10k                 | CTCF sites within X window                            | 10.0      | UCSC - hg18 LiftOver |
| Bound Proteins | NRSF.10k                 | NRSF or REST sites within X window                    | 10.0      | UCSC - hg18 LiftOver |
| Bound Proteins | PolII.10k                | PolII binding sites within X window                   | 10.0      | UCSC - hg18 LiftOver |
| Bound Proteins | Brd2_promoters.10k       | Brd2 promoters within X window                        | 10.0      | UCSC - hg18 LiftOver |
| Bound Proteins | Brd3_promoters.10k       | Brd3 promoters within X window                        | 10.0      | UCSC - hg18 LiftOver |
| Bound Proteins | Brd4_promoters.10k       | Brd4 promoters within X window                        | 10.0      | UCSC - hg18 LiftOver |
| Bound Proteins | HP1a_promoters.10k       | HP1alpha promoters within X window                    | 10.0      | UCSC - hg18 LiftOver |
| Bound Proteins | HP1b_promoters.10k       | HP1beta promoters within X window                     | 10.0      | UCSC - hg18 LiftOver |
| Bound Proteins | Act_CD4_HDAC6.10k        | HDAC6 binding in Activated CD4 Tcells within X window | 10.0      | UCSC - hg18 LiftOver |
| Bound Proteins | Act_CD4_Tip60.10k        | Tip60 binding in Activated CD4 Tcells within X window | 10.0      | UCSC - hg18 LiftOver |
| Bound Proteins | ActivatedNucleosomes.10k | Activated Nucleosomes                                 | 10.0      | UCSC - hg18 LiftOver |
| Bound Proteins | RestingNucleosomes.10k   | Resting Nucleosomes                                   | 10.0      | UCSC - hg18 LiftOver |
| Bound Proteins | Rest_CD4_CBP.10k         | CBP binding in Resting CD4 Tcells within X window     | 10.0      | UCSC - hg18 LiftOver |
| Bound Proteins | Rest_CD4_HDAC1.10k       | HDAC1 binding in Resting CD4 Tcells within X window   | 10.0      | UCSC - hg18 LiftOver |
| Bound Proteins | Rest_CD4_HDAC2.10k       | HDAC2 binding in Resting CD4 Tcells within X window   | 10.0      | UCSC - hg18 LiftOver |
| Bound Proteins | Rest_CD4_HDAC3.10k       | HDAC3 binding in Resting CD4 Tcells within X window   | 10.0      | UCSC - hg18 LiftOver |
| Bound Proteins | Rest_CD4_HDAC6.10k       | HDAC6 binding in Resting CD4 Tcells within X window   | 10.0      | UCSC - hg18 LiftOver |
| Bound Proteins | Rest_CD4_MOF.10k         | MOF binding in Resting CD4 Tcells within X window     | 10.0      | UCSC - hg18 LiftOver |
| Bound Proteins | Rest_CD4_p300.10k        | p300 binding in Resting CD4 Tcells within X window    | 10.0      | UCSC - hg18 LiftOver |
| Bound Proteins | Rest_CD4_PCAF.10k        | PCAF binding in Resting CD4 Tcells within X window    | 10.0      | UCSC - hg18 LiftOver |
| Bound Proteins | Rest_CD4_Tip60.10k       | Tip60 binding in Resting CD4 Tcells within X window   | 10.0      | UCSC - hg18 LiftOver |



Supplementary Report 1:  
Genes of interest marked by vector integration  
All Patients (CLL & ALL) and  
Response Groups (CR/PRtd & PR/NR)

**Contents**

|                                               |           |
|-----------------------------------------------|-----------|
| <b>Summary</b>                                | <b>2</b>  |
| Integration Frequency (Enrichment) . . . . .  | 7         |
| Integration Frequency (Depletion) . . . . .   | 8         |
| Genes with the Most Abundant Clones . . . . . | 9         |
| Longitudinal Observation . . . . .            | 10        |
| <b>Reference Data</b>                         | <b>11</b> |
| <b>Comprehensive Genes of Interest Table</b>  | <b>12</b> |

---

## Summary

Lentiviral vectors integrate into genomes of targeted host cells (Tcells). These genomic locations of vector integrations are identifiable through integration site sequencing. Abundances of individual cell clones can be inferred by the sonicLength method (**Berry *et al.* 2012**).

In this report, we mined the data collected from integration site sequencing for 40 CART treated subjects. We constructed 4 gene lists based on: 1 & 2) increased / decreased integration site occurrence in patient samples relative to the initial transduction product, 3) peak clonal abundance, and 4) longitudinal clonal persistence. More about each of these criteria is below:

- **Integration Frequency** is the rate at which integration sites are observed within a gene. This is compared between patient samples and the initial transduction product to score enrichment or depletion during growth in patients. The top of genes with higher patient sample integration frequency over transduction samples were chosen for study (p-value  $\leq 0.05$  after exclusion of genes with clones from less than 2 patients and less than 10 observed clones).
- **Clonal Abundance** can be determined during analysis by quantifying the number of sites of linker ligation associated with each unique integration site. This method is further described in **Berry *et al.* 2012**. This allows clonal expansion to be quantified. The top 1% of the genes were selected for study based on their maximal peak clonal abundance.
- **Longitudinal Observation** of clones is the quantification of observed timespans and last observed timepoints. The maximum value for clones within a gene were considered for characterization of the gene in this analysis. Genes were only considered if there were 10 or more integration sites isolated from at least two different patient samples. Genes were also not considered if they only consisted of clones which were observed once or the last observed timepoint was less than 90 days from initial infusion.

A point to keep in mind through all this analysis is that integration sites are sampled from a larger population. It would be rare for all integration sites in a sample to be represented in the sequence data.

Table 1: Summary of each filtering criteria.

| Criteria     | Gene  | Onco        | Tumor           | Lymphoma    | COSMIC      | TCGA        | Clonal Hema. |
|--------------|-------|-------------|-----------------|-------------|-------------|-------------|--------------|
|              | Count | Related (%) | Suppressors (%) | Related (%) | Related (%) | Related (%) | Related (%)  |
| Enrichment   | 102   | */ * 19.6   | */ * 13.73      | / 0.000     | */ * 8.82   | */ * 9.80   | / 0.980      |
| Depletion    | 93    | */ * 20.4   | */ * 10.75      | / 0.000     | / 6.45      | */ * 8.60   | / 1.075      |
| Abundance    | 132   | */ * 20.5   | / 5.30          | / 0.000     | */ * 8.33   | / 4.55      | / 0.758      |
| Longitudinal | 226   | */ * 25.2   | */ * 11.95      | / 0.442     | */ * 11.95  | */ * 11.50  | */ * 1.327   |
| Composite    | 404   | */ * 20.8   | */ * 9.41       | / 0.248     | */ * 10.15  | */ * 8.91   | */ 0.743     |

**Table 1** summarizes the size and contents of each criteria gene list identified by the various methods. Significance of overlap between lists are displayed by asterisks before the percent of genes identified from the criteria list which overlap with the column specified group. The asterisk to the left of the “/” indicates a p-value below 0.05 *before* multiple comparison corrections, while an asterisk to the right of the “/” indicates a p-value below 0.05 *after* multiple comparison corrections. Significance was tested using Fishers Exact test and multiple comparison corrections were made using a Benjamini-Hochberg (FDR) method for each criteria based list.

Percent of all analyzed transcription units associated with each list as as follows:

- Onco Related: 9.1%
- Tumor Suppressors: 4.83%
- Lymphoma Related: 0.16%
- COSMIC Related: 3.55%
- TCGA Related: 2.73%
- Clonal Hematopoiesis Related: 0.17%

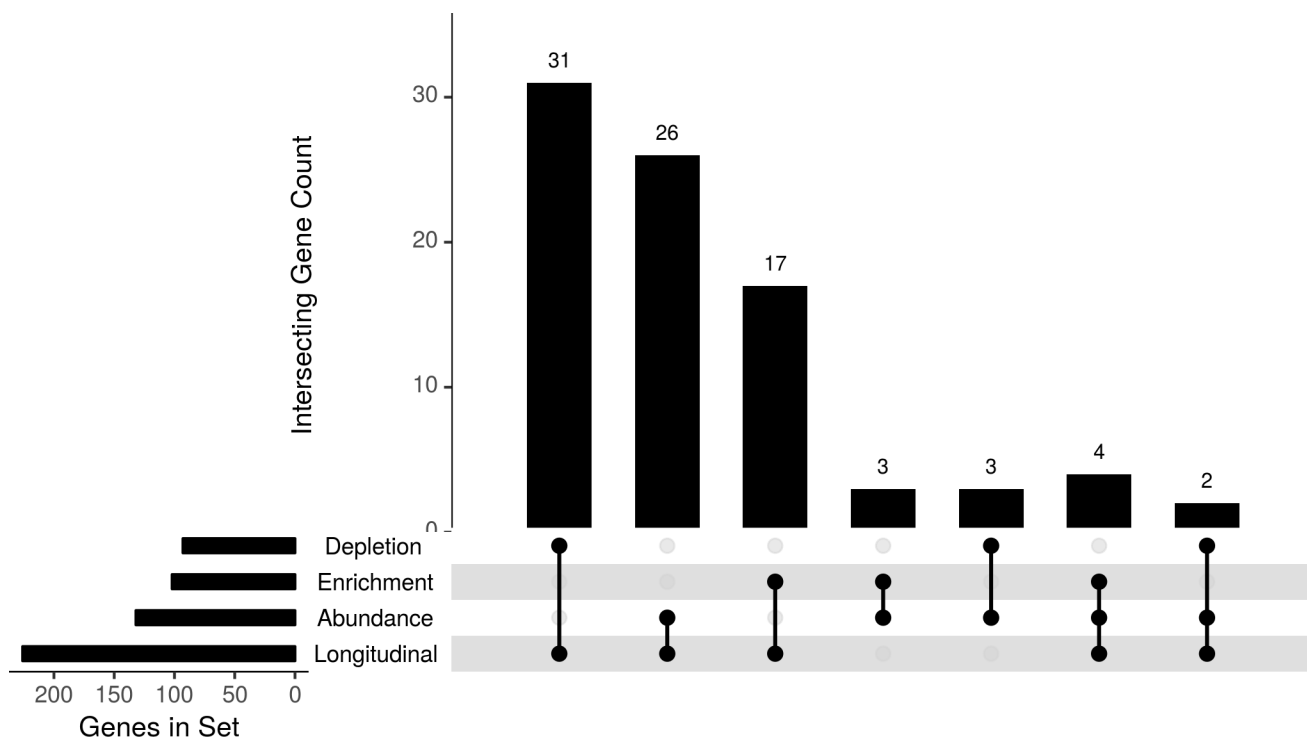

Figure 1: Intersecting gene lists identified through the various selection criteria.

Table 2: The most consistently observed genes from filtering by various criteria. The 'Criteria.' column is a count of how many times the gene was identified by these methods, while the 'Patients' column notes how many specimens collected from patients have had integration sites within the noted gene.

| Gene   | Patients | Freq. Change (%) | Peak Abund. | Long. Obs. | Criteria |
|--------|----------|------------------|-------------|------------|----------|
| AKAP13 | 12       | 75.1             | 27          | 360        | EAL      |
| UBAP2L | 12       | 65.9             | 30          | 180        | EAL      |
| PTBP1  | 8        | 106.0            | 47          | 360        | EAL      |
| TET2   | 6        | 196.7            | 814         | 1584       | EAL      |

Table 3: GO Biological Process. Top 6 per group. Total genes considered: 400

| Group | GO ID      | GO Term                                                                              | Term Size | Gene Count | Ad-justed P-value |
|-------|------------|--------------------------------------------------------------------------------------|-----------|------------|-------------------|
| 1     | GO:0016569 | covalent chromatin modification                                                      | 465       | 44         | 0.0000000         |
|       | GO:0016570 | histone modification                                                                 | 377       | 39         | 0.0000000         |
|       | GO:0018205 | peptidyl-lysine modification                                                         | 317       | 35         | 0.0000000         |
|       | GO:0043414 | macromolecule methylation                                                            | 232       | 18         | 0.0053317         |
|       | GO:0006479 | protein methylation                                                                  | 152       | 16         | 0.0003283         |
|       | GO:0033044 | regulation of chromosome organization                                                | 256       | 16         | 0.0448756         |
| 2     | GO:1903827 | regulation of cellular protein localization                                          | 462       | 30         | 0.0022168         |
|       | GO:0080135 | regulation of cellular response to stress                                            | 489       | 29         | 0.0105064         |
|       | GO:0032386 | regulation of intracellular transport                                                | 388       | 27         | 0.0015907         |
|       | GO:0006281 | DNA repair                                                                           | 454       | 27         | 0.0142276         |
|       | GO:0006913 | nucleocytoplasmic transport                                                          | 369       | 22         | 0.0236988         |
|       | GO:0051169 | nuclear transport                                                                    | 376       | 22         | 0.0291111         |
| 3     | GO:0010256 | endomembrane system organization                                                     | 496       | 39         | 0.0000019         |
|       | GO:0030155 | regulation of cell adhesion                                                          | 473       | 29         | 0.0067485         |
|       | GO:0032101 | regulation of response to external stimulus                                          | 472       | 27         | 0.0225913         |
|       | GO:0030036 | actin cytoskeleton organization                                                      | 451       | 25         | 0.0324282         |
|       | GO:0051493 | regulation of cytoskeleton organization                                              | 352       | 23         | 0.0100700         |
|       | GO:0097435 | supramolecular fiber organization                                                    | 423       | 23         | 0.0448756         |
| 4     | GO:0051640 | organelle localization                                                               | 415       | 26         | 0.0090197         |
|       | GO:0051656 | establishment of organelle localization                                              | 352       | 25         | 0.0019782         |
|       | GO:0048285 | organelle fission                                                                    | 384       | 23         | 0.0225913         |
|       | GO:0000280 | nuclear division                                                                     | 351       | 22         | 0.0195459         |
|       | GO:0016050 | vesicle organization                                                                 | 310       | 21         | 0.0102878         |
|       | GO:0048193 | Golgi vesicle transport                                                              | 294       | 18         | 0.0379356         |
| 5     | GO:0046649 | lymphocyte activation                                                                | 472       | 25         | 0.0452453         |
|       | GO:0071396 | cellular response to lipid                                                           | 369       | 23         | 0.0170187         |
|       | GO:0048729 | tissue morphogenesis                                                                 | 396       | 23         | 0.0266749         |
|       | GO:0071407 | cellular response to organic cyclic compound                                         | 414       | 23         | 0.0417615         |
|       | GO:0009792 | embryo development ending in birth or egg hatching                                   | 362       | 22         | 0.0225913         |
|       | GO:0006914 | autophagy                                                                            | 402       | 22         | 0.0475427         |
| 6     | GO:0006397 | mRNA processing                                                                      | 409       | 30         | 0.0002568         |
|       | GO:0008380 | RNA splicing                                                                         | 360       | 22         | 0.0225913         |
|       | GO:0000377 | RNA splicing, via transesterification reactions with bulged adenosine as nucleophile | 277       | 17         | 0.0435616         |
|       | GO:0000398 | mRNA splicing, via spliceosome                                                       | 277       | 17         | 0.0435616         |
|       | GO:0000375 | RNA splicing, via transesterification reactions                                      | 279       | 17         | 0.0448756         |
|       | GO:0050684 | regulation of mRNA processing                                                        | 97        | 8          | 0.0458860         |
| 7     | GO:0006511 | ubiquitin-dependent protein catabolic process                                        | 497       | 30         | 0.0069438         |
|       | GO:0010498 | proteasomal protein catabolic process                                                | 371       | 22         | 0.0251384         |
|       | GO:0043161 | proteasome-mediated ubiquitin-dependent protein catabolic process                    | 342       | 20         | 0.0405641         |
|       | GO:0061136 | regulation of proteasomal protein catabolic process                                  | 134       | 12         | 0.0106185         |
|       | GO:0009895 | negative regulation of catabolic process                                             | 174       | 12         | 0.0448756         |
|       | GO:0032434 | regulation of proteasomal ubiquitin-dependent protein catabolic process              | 101       | 11         | 0.0034931         |

Table 4: KEGG Pathway analysis. Top 10 per group. Total genes considered: 190

| Group         | KEGG ID                          | Description                                     | Term Size | Gene Count | Adjusted P-value |
|---------------|----------------------------------|-------------------------------------------------|-----------|------------|------------------|
| 1             | path:hsa04024                    | cAMP signaling pathway                          | 141       | 12         | 0.0230257        |
|               | path:hsa04120                    | Ubiquitin mediated proteolysis                  | 127       | 11         | 0.0230257        |
|               | path:hsa04720                    | Long-term potentiation                          | 51        | 9          | 0.0004645        |
|               | path:hsa04114                    | Oocyte meiosis                                  | 99        | 8          | 0.0713955        |
|               | path:hsa04921                    | Oxytocin signaling pathway                      | 114       | 8          | 0.0936522        |
|               | path:hsa04916                    | Melanogenesis                                   | 61        | 7          | 0.0230257        |
|               | path:hsa04310                    | Wnt signaling pathway                           | 103       | 7          | 0.1074085        |
|               | path:hsa05152                    | Tuberculosis                                    | 118       | 7          | 0.1360859        |
|               | path:hsa04360                    | Axon guidance                                   | 142       | 7          | 0.2296122        |
|               | path:hsa04020                    | Calcium signaling pathway                       | 136       | 6          | 0.3099265        |
| 2             | path:hsa05200                    | Pathways in cancer                              | 358       | 17         | 0.1360859        |
|               | path:hsa04144                    | Endocytosis                                     | 211       | 13         | 0.0771521        |
|               | path:hsa04919                    | Thyroid hormone signaling pathway               | 92        | 11         | 0.0026018        |
|               | path:hsa05165                    | Human papillomavirus infection                  | 235       | 11         | 0.2021271        |
|               | path:hsa05203                    | Viral carcinogenesis                            | 162       | 10         | 0.1065141        |
|               | path:hsa05206                    | MicroRNAs in cancer                             | 189       | 10         | 0.1412888        |
|               | path:hsa05166                    | Human T-cell leukemia virus 1 infection         | 173       | 9          | 0.1568472        |
|               | path:hsa04068                    | FoxO signaling pathway                          | 90        | 8          | 0.0463230        |
|               | path:hsa05202                    | Transcriptional misregulation in cancer         | 112       | 8          | 0.0872195        |
|               | path:hsa05016                    | Huntington disease                              | 147       | 7          | 0.2507228        |
| 3             | path:hsa04070                    | Phosphatidylinositol signaling system           | 89        | 6          | 0.1195906        |
|               | path:hsa00562                    | Inositol phosphate metabolism                   | 67        | 5          | 0.1160011        |
| 4             | path:hsa03018                    | RNA degradation                                 | 70        | 5          | 0.1195906        |
| 5             | path:hsa05205                    | Proteoglycans in cancer                         | 133       | 12         | 0.0187863        |
|               | path:hsa04140                    | Autophagy - animal                              | 114       | 10         | 0.0285422        |
|               | path:hsa00310                    | Lysine degradation                              | 51        | 9          | 0.0004645        |
|               | path:hsa05225                    | Hepatocellular carcinoma                        | 107       | 9          | 0.0463230        |
|               | path:hsa04714                    | Thermogenesis                                   | 167       | 9          | 0.1471983        |
|               | path:hsa04915                    | Estrogen signaling pathway                      | 87        | 7          | 0.0771521        |
|               | path:hsa04910                    | Insulin signaling pathway                       | 108       | 7          | 0.1185385        |
|               | path:hsa04072                    | Phospholipase D signaling pathway               | 110       | 7          | 0.1195906        |
|               | path:hsa04014                    | Ras signaling pathway                           | 158       | 7          | 0.2964885        |
| path:hsa05168 | Herpes simplex virus 1 infection | 382                                             | 7         | 0.9259280  |                  |
| 6             | path:hsa04010                    | MAPK signaling pathway                          | 208       | 13         | 0.0771521        |
|               | path:hsa04141                    | Protein processing in endoplasmic reticulum     | 139       | 11         | 0.0402779        |
|               | path:hsa05163                    | Human cytomegalovirus infection                 | 166       | 10         | 0.1074085        |
|               | path:hsa04810                    | Regulation of actin cytoskeleton                | 156       | 9          | 0.1263724        |
|               | path:hsa04218                    | Cellular senescence                             | 116       | 8          | 0.0960844        |
|               | path:hsa04022                    | cGMP-PKG signaling pathway                      | 115       | 7          | 0.1346511        |
|               | path:hsa05167                    | Kaposi sarcoma-associated herpesvirus infection | 131       | 7          | 0.1791738        |
|               | path:hsa04660                    | T cell receptor signaling pathway               | 84        | 6          | 0.1103395        |
|               | path:hsa04380                    | Osteoclast differentiation                      | 90        | 6          | 0.1195906        |
|               | path:hsa04650                    | Natural killer cell mediated cytotoxicity       | 90        | 6          | 0.1195906        |

## Integration Frequency (Enrichment)

Table 5: Table of top 50 genes with the most frequent clonal enrichment.

| Gene         | Num. Patients | TDN Sites | Patient Sites | Onco-Related | Frequency Increase (%) |
|--------------|---------------|-----------|---------------|--------------|------------------------|
| HERC2        | 6             | 3         | 10            | FALSE        | 518.1                  |
| PIP5K1A      | 9             | 4         | 13            | FALSE        | 502.7                  |
| RAB11FIP2    | 9             | 4         | 12            | FALSE        | 456.3                  |
| NUP107       | 9             | 4         | 12            | FALSE        | 456.3                  |
| HSF2         | 8             | 5         | 14            | FALSE        | 419.2                  |
| PDCD10       | 9             | 4         | 11            | FALSE        | 410.0                  |
| LRPPRC       | 10            | 6         | 15            | FALSE        | 363.6                  |
| RAD23B       | 7             | 4         | 10            | TRUE         | 363.6                  |
| RBM27        | 6             | 5         | 12            | FALSE        | 345.1                  |
| PIKFYVE      | 10            | 5         | 12            | FALSE        | 345.1                  |
| ABLIM1       | 6             | 5         | 11            | FALSE        | 308.0                  |
| CAMKMT       | 6             | 5         | 11            | FALSE        | 308.0                  |
| TMTC3        | 6             | 6         | 13            | FALSE        | 301.8                  |
| ARHGAP12     | 6             | 5         | 10            | FALSE        | 270.9                  |
| ATG5         | 9             | 10        | 19            | FALSE        | 252.3                  |
| GNA12        | 6             | 6         | 11            | TRUE         | 240.0                  |
| ATE1         | 7             | 6         | 11            | FALSE        | 240.0                  |
| PPP4R2       | 7             | 6         | 11            | FALSE        | 240.0                  |
| BCKDHB       | 7             | 6         | 11            | FALSE        | 240.0                  |
| FRG1BP       | 9             | 8         | 14            | FALSE        | 224.5                  |
| MACROD2      | 7             | 8         | 14            | FALSE        | 224.5                  |
| FUS          | 5             | 7         | 12            | TRUE         | 217.9                  |
| UCLH3        | 7             | 7         | 12            | FALSE        | 217.9                  |
| CPEB2        | 11            | 10        | 17            | FALSE        | 215.2                  |
| HELLS        | 10            | 10        | 17            | FALSE        | 215.2                  |
| KDM4A        | 9             | 10        | 17            | FALSE        | 215.2                  |
| SNRPA        | 5             | 6         | 10            | FALSE        | 209.1                  |
| LUC7L2       | 8             | 6         | 10            | FALSE        | 209.1                  |
| USP9Y        | 7             | 6         | 10            | FALSE        | 209.1                  |
| CDK8         | 7             | 6         | 10            | FALSE        | 209.1                  |
| BZW2         | 6             | 6         | 10            | FALSE        | 209.1                  |
| RBPJ         | 9             | 6         | 10            | FALSE        | 209.1                  |
| IKZF2        | 8             | 8         | 13            | TRUE         | 201.3                  |
| FUNDC2       | 6             | 8         | 13            | FALSE        | 201.3                  |
| PDE12        | 7             | 8         | 13            | FALSE        | 201.3                  |
| URI1         | 9             | 13        | 21            | FALSE        | 199.6                  |
| TET2         | 6             | 10        | 16            | TRUE         | 196.7                  |
| FANCL        | 5             | 7         | 11            | FALSE        | 191.4                  |
| PRKN         | 7             | 7         | 11            | FALSE        | 191.4                  |
| LOC101929095 | 12            | 13        | 20            | FALSE        | 185.3                  |
| ASCC3        | 8             | 22        | 33            | FALSE        | 178.2                  |
| WWP1         | 9             | 15        | 22            | TRUE         | 172.0                  |
| GMDS         | 12            | 13        | 19            | FALSE        | 171.0                  |
| BRWD3        | 6             | 9         | 13            | TRUE         | 167.9                  |
| ECD          | 6             | 9         | 13            | FALSE        | 167.9                  |
| KIF20B       | 9             | 9         | 13            | FALSE        | 167.9                  |
| PHF3         | 10            | 14        | 20            | FALSE        | 164.9                  |
| RBM39        | 11            | 14        | 20            | TRUE         | 164.9                  |
| NDFIP2       | 6             | 12        | 17            | FALSE        | 162.7                  |
| MTREX        | 9             | 12        | 17            | FALSE        | 162.7                  |

## Integration Frequency (Depletion)

Table 6: Table of top 50 genes with the most frequent clonal depletion.

| Gene       | Num. Patients | TDN Sites | Patient Sites | Onco-Related | Frequency Increase (%) |
|------------|---------------|-----------|---------------|--------------|------------------------|
| RNPS1      | 6             | 146       | 17            | FALSE        | -78.4                  |
| EXOC2      | 5             | 66        | 10            | FALSE        | -71.9                  |
| LSM2       | 7             | 73        | 13            | FALSE        | -67.0                  |
| NOSIP      | 10            | 158       | 31            | FALSE        | -63.6                  |
| SFI1       | 6             | 56        | 11            | FALSE        | -63.6                  |
| ZNF598     | 5             | 56        | 11            | FALSE        | -63.6                  |
| UBE2J2     | 7             | 69        | 14            | FALSE        | -62.4                  |
| ZBTB4      | 6             | 49        | 10            | FALSE        | -62.2                  |
| WDR90      | 8             | 53        | 11            | FALSE        | -61.5                  |
| IP6K1      | 11            | 139       | 29            | FALSE        | -61.3                  |
| EIF2B3     | 10            | 81        | 17            | FALSE        | -61.1                  |
| STK11      | 7             | 47        | 10            | TRUE         | -60.5                  |
| WNK1       | 6             | 70        | 15            | FALSE        | -60.3                  |
| PLEC       | 10            | 105       | 23            | FALSE        | -59.4                  |
| NARFL      | 9             | 54        | 12            | FALSE        | -58.8                  |
| PRKAR2A    | 6             | 58        | 13            | FALSE        | -58.4                  |
| HAGH       | 5             | 53        | 12            | FALSE        | -58.0                  |
| GRAP2      | 6             | 44        | 10            | FALSE        | -57.9                  |
| IFT140     | 8             | 83        | 19            | FALSE        | -57.5                  |
| CCND3      | 10            | 82        | 19            | TRUE         | -57.0                  |
| CNOT6      | 5             | 47        | 11            | FALSE        | -56.6                  |
| DIDO1      | 6             | 42        | 10            | FALSE        | -55.8                  |
| QRICH1     | 8             | 92        | 22            | FALSE        | -55.7                  |
| PSMB9      | 9             | 54        | 13            | FALSE        | -55.4                  |
| PCBP3      | 4             | 41        | 10            | FALSE        | -54.8                  |
| PCED1B     | 6             | 45        | 11            | TRUE         | -54.7                  |
| TAP2       | 8             | 49        | 12            | TRUE         | -54.6                  |
| HORMAD2    | 8             | 93        | 23            | FALSE        | -54.1                  |
| TSC2       | 9             | 88        | 22            | TRUE         | -53.6                  |
| RPRD2      | 6             | 44        | 11            | FALSE        | -53.6                  |
| ZGPAT      | 11            | 98        | 25            | FALSE        | -52.7                  |
| HCG20      | 9             | 90        | 23            | FALSE        | -52.6                  |
| RAB40C     | 7             | 43        | 11            | FALSE        | -52.6                  |
| FAM222B    | 4             | 39        | 10            | FALSE        | -52.5                  |
| FKBP5      | 13            | 126       | 33            | FALSE        | -51.4                  |
| RBM14-RBM4 | 7             | 42        | 11            | FALSE        | -51.4                  |
| ABHD16A    | 9             | 38        | 10            | FALSE        | -51.2                  |
| MCM3AP     | 6             | 38        | 10            | FALSE        | -51.2                  |
| MIR5096    | 6             | 49        | 13            | FALSE        | -50.8                  |
| MTMR3      | 6             | 45        | 12            | TRUE         | -50.5                  |
| MROH1      | 13            | 291       | 78            | FALSE        | -50.3                  |
| SEPT2      | 7             | 41        | 11            | TRUE         | -50.2                  |
| TC2N       | 5             | 37        | 10            | FALSE        | -49.9                  |
| TRAF2      | 10            | 103       | 28            | FALSE        | -49.6                  |
| CEACAM21   | 9             | 73        | 20            | FALSE        | -49.2                  |
| RBM4       | 9             | 47        | 13            | FALSE        | -48.7                  |
| ADCK5      | 6             | 47        | 13            | FALSE        | -48.7                  |
| RNF216     | 9             | 54        | 15            | TRUE         | -48.5                  |
| PRRC2A     | 7             | 61        | 17            | FALSE        | -48.3                  |
| ASCC1      | 7             | 43        | 12            | FALSE        | -48.2                  |



## Genes with the Most Abundant Clones

Table 7: Table of top 50 Genes containing the highest abundant clones.

| Gene            | Num. Patients | Peak Abundance | Peak Rel. Abund. | Clonal Gini Index | Onco-Related |
|-----------------|---------------|----------------|------------------|-------------------|--------------|
| TET2            | 8             | 814            | 0.989            | 0.923             | TRUE         |
| KCTD3           | 4             | 589            | 0.265            | 0.745             | FALSE        |
| PATL1           | 4             | 578            | 0.260            | 0.793             | FALSE        |
| PIKFYVE         | 10            | 410            | 0.273            | 0.890             | FALSE        |
| SRCAP           | 11            | 373            | 0.357            | 0.896             | FALSE        |
| MTMR3           | 6             | 261            | 0.041            | 0.876             | TRUE         |
| PCNX1           | 11            | 153            | 0.010            | 0.827             | FALSE        |
| PPP6R3          | 15            | 149            | 0.040            | 0.717             | FALSE        |
| SSH2            | 10            | 137            | 0.062            | 0.792             | FALSE        |
| RSRC1           | 9             | 109            | 0.014            | 0.812             | FALSE        |
| SNHG12          | 2             | 96             | 0.057            | 0.646             | FALSE        |
| MAPK14          | 9             | 91             | 0.018            | 0.774             | TRUE         |
| RPA3            | 5             | 87             | 0.020            | 0.783             | FALSE        |
| ZNF573          | 3             | 86             | 0.610            | 0.677             | FALSE        |
| MGA             | 13            | 85             | 0.013            | 0.746             | FALSE        |
| AQR             | 5             | 84             | 0.022            | 0.798             | FALSE        |
| LEF1            | 9             | 84             | 0.038            | 0.765             | TRUE         |
| LINC01473       | 3             | 82             | 0.075            | 0.643             | FALSE        |
| CARD8           | 14            | 79             | 0.056            | 0.681             | TRUE         |
| IQCB1           | 5             | 79             | 0.028            | 0.752             | FALSE        |
| DNAJC13         | 9             | 71             | 0.004            | 0.764             | FALSE        |
| EXOSC10         | 4             | 70             | 0.008            | 0.776             | FALSE        |
| ATP2A2          | 8             | 67             | 0.030            | 0.749             | FALSE        |
| SEC31A          | 6             | 66             | 0.004            | 0.752             | FALSE        |
| GPN1            | 2             | 62             | 0.017            | 0.711             | FALSE        |
| SMAP2           | 6             | 61             | 0.004            | 0.768             | FALSE        |
| TRIO            | 6             | 61             | 0.025            | 0.769             | TRUE         |
| ZZEF1           | 13            | 56             | 0.333            | 0.614             | FALSE        |
| CLK4            | 8             | 53             | 0.036            | 0.653             | FALSE        |
| IFNGR2          | 2             | 53             | 0.722            | 0.635             | TRUE         |
| JMJD6           | 2             | 53             | 0.015            | 0.755             | FALSE        |
| KDM5D           | 8             | 51             | 0.017            | 0.745             | FALSE        |
| UBR1            | 10            | 48             | 0.421            | 0.686             | FALSE        |
| MEMO1           | 6             | 47             | 0.006            | 0.741             | FALSE        |
| PTBP1           | 8             | 47             | 0.043            | 0.660             | TRUE         |
| DYNC1H1         | 8             | 44             | 0.003            | 0.709             | FALSE        |
| NGDN            | 3             | 44             | 0.005            | 0.623             | FALSE        |
| EIF2AK4         | 3             | 43             | 0.003            | 0.659             | FALSE        |
| MSH5-SAPCD1     | 4             | 43             | 0.039            | 0.708             | FALSE        |
| POLG2           | 2             | 43             | 0.003            | 0.708             | FALSE        |
| RASEF           | 2             | 43             | 0.005            | 0.622             | FALSE        |
| UXT-AS1         | 2             | 43             | 0.039            | 0.477             | FALSE        |
| ADD1            | 10            | 42             | 0.011            | 0.594             | FALSE        |
| GRB2            | 12            | 42             | 0.017            | 0.554             | TRUE         |
| KIFC1           | 7             | 42             | 0.003            | 0.694             | FALSE        |
| TAC3            | 2             | 42             | 0.018            | 0.477             | FALSE        |
| ZNF92           | 3             | 42             | 0.031            | 0.707             | FALSE        |
| ACTL6A          | 1             | 40             | 0.003            | 0.000             | FALSE        |
| ATP6V1G2-DDX39B | 11            | 40             | 0.005            | 0.621             | FALSE        |
| PHF12           | 2             | 40             | 0.014            | 0.670             | FALSE        |

## Longitudinal Observation

Table 8: Table of top 50 genes identified by longitudinal observations.

| Gene     | Time Span | Longest Time | Obs. Count | Num. Patients | Patient Sites | Peak Abund. | Onco-Related |
|----------|-----------|--------------|------------|---------------|---------------|-------------|--------------|
| FKBP5    | 1555.0    | 1825.0       | 4          | 13            | 33            | 15          | FALSE        |
| PTPRA    | 1555.0    | 1825.0       | 3          | 9             | 36            | 4           | FALSE        |
| TET2     | 1464.0    | 1584.0       | 7          | 6             | 16            | 814         | TRUE         |
| UBR1     | 1277.5    | 1825.0       | 4          | 10            | 18            | 48          | FALSE        |
| COX6B1   | 825.0     | 1095.0       | 3          | 10            | 18            | 5           | FALSE        |
| CCDC57   | 642.5     | 912.5        | 2          | 15            | 40            | 6           | FALSE        |
| KMT5B    | 642.5     | 912.5        | 2          | 13            | 32            | 7           | FALSE        |
| MACF1    | 519.5     | 547.5        | 3          | 14            | 34            | 11          | TRUE         |
| DNMT1    | 365.0     | 912.5        | 2          | 14            | 74            | 13          | TRUE         |
| STXBP5   | 350.0     | 360.0        | 4          | 11            | 21            | 8           | FALSE        |
| CASK     | 346.0     | 547.5        | 2          | 8             | 17            | 5           | FALSE        |
| RPTOR    | 346.0     | 360.0        | 2          | 19            | 96            | 11          | FALSE        |
| DIP2A    | 346.0     | 360.0        | 2          | 14            | 41            | 25          | FALSE        |
| PTBP1    | 346.0     | 360.0        | 2          | 8             | 20            | 47          | TRUE         |
| MIR4745  | 346.0     | 360.0        | 2          | 7             | 13            | 47          | FALSE        |
| ZZEF1    | 332.0     | 360.0        | 5          | 13            | 51            | 56          | FALSE        |
| SRCAP    | 332.0     | 360.0        | 5          | 11            | 23            | 373         | FALSE        |
| SNORA30  | 332.0     | 360.0        | 5          | 7             | 10            | 373         | FALSE        |
| OGDH     | 332.0     | 360.0        | 4          | 5             | 12            | 17          | FALSE        |
| WDR82    | 277.5     | 547.5        | 3          | 10            | 25            | 7           | TRUE         |
| PIP5K1A  | 277.5     | 547.5        | 2          | 9             | 13            | 3           | FALSE        |
| EP400P1  | 260.0     | 270.0        | 3          | 6             | 18            | 5           | FALSE        |
| HSF1     | 256.0     | 270.0        | 3          | 13            | 48            | 10          | FALSE        |
| BOP1     | 256.0     | 270.0        | 3          | 12            | 35            | 10          | TRUE         |
| FNBP1    | 256.0     | 270.0        | 2          | 10            | 35            | 5           | TRUE         |
| ACOX1    | 256.0     | 270.0        | 2          | 8             | 19            | 2           | FALSE        |
| PDS5B    | 256.0     | 270.0        | 2          | 8             | 16            | 10          | TRUE         |
| PIK3C3   | 180.0     | 360.0        | 3          | 12            | 33            | 5           | FALSE        |
| IQGAP1   | 166.0     | 180.0        | 3          | 11            | 22            | 5           | FALSE        |
| SNAPC4   | 166.0     | 180.0        | 2          | 10            | 21            | 7           | FALSE        |
| UBE2J2   | 166.0     | 180.0        | 2          | 7             | 14            | 2           | FALSE        |
| SSH2     | 152.0     | 1095.0       | 4          | 10            | 30            | 137         | FALSE        |
| CARD8    | 152.0     | 270.0        | 4          | 14            | 44            | 79          | TRUE         |
| MED13    | 152.0     | 270.0        | 4          | 13            | 27            | 21          | FALSE        |
| LEF1     | 152.0     | 180.0        | 4          | 9             | 18            | 84          | TRUE         |
| VAV1     | 152.0     | 180.0        | 3          | 14            | 80            | 37          | TRUE         |
| STAG1    | 136.0     | 912.5        | 2          | 9             | 14            | 6           | TRUE         |
| PPP6R2   | 136.0     | 180.0        | 2          | 14            | 45            | 15          | FALSE        |
| RTTN     | 136.0     | 150.0        | 2          | 9             | 16            | 6           | FALSE        |
| MAPK8IP3 | 130.0     | 270.0        | 2          | 12            | 34            | 5           | FALSE        |
| SMG1     | 122.0     | 150.0        | 3          | 14            | 41            | 7           | FALSE        |
| INPP4B   | 122.0     | 150.0        | 3          | 13            | 32            | 3           | FALSE        |
| PIAS1    | 122.0     | 150.0        | 3          | 11            | 24            | 6           | FALSE        |
| DDX60    | 122.0     | 150.0        | 3          | 10            | 16            | 22          | FALSE        |
| ZNRD1ASP | 122.0     | 150.0        | 3          | 6             | 14            | 4           | FALSE        |
| DPYD     | 122.0     | 150.0        | 2          | 14            | 36            | 22          | FALSE        |
| RUNX1    | 110.0     | 360.0        | 2          | 9             | 19            | 1           | TRUE         |
| ASH1L    | 106.0     | 1825.0       | 2          | 14            | 51            | 5           | FALSE        |
| WVOX     | 106.0     | 1095.0       | 3          | 6             | 12            | 5           | TRUE         |
| RFX2     | 106.0     | 360.0        | 2          | 7             | 14            | 9           | TRUE         |

## Reference Data

The NCBI RefGenes data set was used to identify gene regions (hg38) while genes identified as onco-related were from the Bushman Lab curated list of **onco-related genes**.

Gene Ontologies were extracted from the `GO.db` R-package (v3.4.1). KEGG pathways were acquired via interfacing with the KEGG web-server API through the `KEGGREST` R-package (v1.16.1). Gene lists, including RefSeq genes used for annotation of integration sites, were standardized to HGNC gene symbols (date: 2018-02-07). Groups identified in GO and KEGG analyses were determined from Jaccard distances between identified terms, followed by modularity-optimizing clustering from a weighted-undirected graph using a Louvain algorithm (**Blondel *et al.* 2008**). Terms within groups of GO or KEGG terms have greater overlap of gene lists between themselves than between terms found in other groups. This method was implemented to help reduce the functional redundancy commonly observed in GO and overlapping pathways observed with KEGG.

# Comprehensive Genes of Interest Table

Table 9: Table of all genes identified within analysis.

| Gene     | Chromosome | Start Pos.  | End Pos.    | Patients | Freq. Change (%) | Peak Abund. | Long. Obs. | Criteria |
|----------|------------|-------------|-------------|----------|------------------|-------------|------------|----------|
| AKAP13   | chr15      | 85,375,615  | 85,754,358  | 12       | 75.1             | 27          | 7.0        | EAL      |
| UBAP2L   | chr1       | 154,215,171 | 154,276,510 | 12       | 65.9             | 30          | 7.0        | EAL      |
| PTBP1    | chr19      | 792,391     | 817,327     | 8        | 106.0            | 47          | 346.0      | EAL      |
| TET2     | chr4       | 105,140,874 | 105,284,803 | 6        | 196.7            | 814         | 1464.0     | EAL      |
| LUC7L    | chr16      | 183,968     | 234,482     | 17       | -20.9            | 30          | 7.0        | AL       |
| PPP3CA   | chr4       | 101,018,429 | 101,352,471 | 17       | 118.2            | 6           | 46.0       | EL       |
| JPT2     | chr16      | 1,673,276   | 1,707,072   | 16       | 2.7              | 23          | 46.0       | AL       |
| ANKRD11  | chr16      | 89,262,620  | 89,495,561  | 15       | 10.4             | 23          | 7.0        | AL       |
| PPP6R3   | chr11      | 68,455,717  | 68,620,333  | 15       | 56.3             | 149         | 14.0       | EA       |
| RNF157   | chr17      | 76,137,452  | 76,245,311  | 15       | -21.7            | 28          | 14.0       | AL       |
| SEC16A   | chr9       | 136,435,095 | 136,488,759 | 15       | -8.9             | 29          | 46.0       | AL       |
| CARD8    | chr19      | 48,203,085  | 48,260,946  | 14       | -30.3            | 79          | 152.0      | DAL      |
| CRAMP1   | chr16      | 1,609,639   | 1,682,908   | 14       | 13.8             | 30          | 18.0       | AL       |
| DIP2A    | chr21      | 46,453,948  | 46,575,013  | 14       | -20.8            | 25          | 346.0      | AL       |
| PAFAH1B1 | chr17      | 2,588,628   | 2,690,615   | 14       | -4.7             | 30          | 7.0        | AL       |
| SMG1P1   | chr16      | 22,432,007  | 22,497,220  | 14       | 135.4            | 3           | 100.0      | EL       |
| VAV1     | chr19      | 6,767,667   | 6,862,366   | 14       | 26.8             | 37          | 152.0      | AL       |
| KDM6A    | chrX       | 44,868,174  | 45,117,612  | 13       | 100.9            | 9           | 106.0      | EL       |
| ZZEF1    | chr17      | 3,999,444   | 4,147,959   | 13       | 5.1              | 56          | 332.0      | AL       |
| GMDS     | chr6       | 1,618,799   | 2,250,634   | 12       | 171.0            | 8           | 14.0       | EL       |
| GRB2     | chr17      | 75,313,075  | 75,410,709  | 12       | -14.8            | 42          | 14.0       | AL       |
| JMJD1C   | chr10      | 63,162,220  | 63,527,075  | 12       | 107.7            | 5           | 7.0        | EL       |
| PIK3C3   | chr18      | 41,950,197  | 42,086,482  | 12       | 144.8            | 5           | 180.0      | EL       |
| PRKACB   | chr1       | 84,072,974  | 84,243,498  | 12       | 73.1             | 4           | 7.0        | EL       |
| XPO5     | chr6       | 43,517,329  | 43,581,075  | 12       | 0.2              | 26          | 22.0       | AL       |
| EYA3     | chr1       | 27,965,343  | 28,093,637  | 11       | 117.4            | 7           | 32.0       | EL       |
| PIAS1    | chr15      | 68,049,178  | 68,196,466  | 11       | 93.5             | 6           | 122.0      | EL       |
| SRCAP    | chr16      | 30,694,140  | 30,745,129  | 11       | 4.0              | 373         | 332.0      | AL       |
| ST13     | chr22      | 40,819,534  | 40,862,008  | 11       | 53.5             | 29          | 7.0        | AL       |
| USP25    | chr21      | 15,725,024  | 15,885,071  | 11       | 98.2             | 10          | 46.0       | EL       |
| HELLS    | chr10      | 94,540,766  | 94,607,099  | 10       | 215.2            | 15          | 106.0      | EL       |
| PIKFYVE  | chr2       | 208,261,266 | 208,363,751 | 10       | 345.1            | 410         | 14.0       | EA       |
| SSH2     | chr17      | 29,620,938  | 29,935,228  | 10       | -20.5            | 137         | 152.0      | AL       |
| UBR1     | chr15      | 42,937,899  | 43,111,088  | 10       | -22.4            | 48          | 1277.5     | AL       |
| FAM13A   | chr4       | 88,720,953  | 89,062,195  | 9        | 136.0            | 1           | 7.0        | EL       |
| LEF1     | chr4       | 108,042,544 | 108,173,956 | 9        | -1.8             | 84          | 152.0      | AL       |
| MAPK14   | chr6       | 36,022,676  | 36,116,236  | 9        | 21.5             | 91          | 7.0        | AL       |
| MCPH1    | chr8       | 6,401,591   | 6,653,505   | 9        | 159.6            | 9           | 7.0        | EL       |
| PIP5K1A  | chr1       | 151,193,543 | 151,254,531 | 9        | 502.7            | 3           | 277.5      | EL       |
| RSRC1    | chr3       | 158,105,051 | 158,549,835 | 9        | 23.6             | 109         | 106.0      | AL       |
| SMURF2   | chr17      | 64,539,616  | 64,667,268  | 9        | -36.8            | 27          | 7.0        | AL       |

Table 9: Table of all genes identified within analysis. (continued)

| Gene     | Chromosome | Start Pos.  | End Pos.    | Patients | Freq. Change (%) | Peak Abund. | Long. Obs. | Criteria |
|----------|------------|-------------|-------------|----------|------------------|-------------|------------|----------|
| CLK4     | chr5       | 178,597,663 | 178,632,053 | 8        | 52.3             | 53          | 106.0      | AL       |
| HERC4    | chr10      | 67,916,898  | 68,080,346  | 8        | 33.9             | 35          | 106.0      | AL       |
| PDCD4    | chr10      | 110,866,794 | 110,905,006 | 8        | 36.6             | 26          | 14.0       | AL       |
| MIR4745  | chr19      | 799,939     | 810,001     | 7        | 141.1            | 47          | 346.0      | EL       |
| BRWD3    | chrX       | 80,664,487  | 80,814,734  | 6        | 167.9            | 6           | 7.0        | EL       |
| ECD      | chr10      | 73,129,523  | 73,173,095  | 6        | 167.9            | 24          | 1.0        | EA       |
| MAD1L1   | chr7       | 1,810,791   | 2,237,948   | 6        | -2.9             | 35          | 46.0       | AL       |
| MTMR3    | chr22      | 29,878,168  | 30,035,868  | 6        | -50.5            | 261         | 106.0      | DAL      |
| MTOR     | chr1       | 11,101,530  | 11,267,551  | 6        | -7.3             | 29          | 90.0       | AL       |
| NDFIP2   | chr13      | 79,476,123  | 79,561,077  | 6        | 162.7            | 8           | 46.0       | EL       |
| PA2G4    | chr12      | 56,099,318  | 56,118,910  | 6        | 48.4             | 38          | 14.0       | AL       |
| FANCA    | chr16      | 89,732,550  | 89,821,657  | 20       | 16.0             | 21          | 15.0       | L        |
| NPLOC4   | chr17      | 81,551,884  | 81,642,153  | 19       | -33.7            | 16          | 46.0       | DL       |
| RPTOR    | chr17      | 80,539,824  | 80,971,373  | 19       | 0.0              | 11          | 346.0      | L        |
| KDM2A    | chr11      | 67,114,268  | 67,263,079  | 18       | -35.4            | 7           | 50.0       | DL       |
| CBFB     | chr16      | 67,024,146  | 67,106,055  | 16       | 66.9             | 14          | 22.0       | E        |
| EP300    | chr22      | 41,087,609  | 41,185,077  | 16       | 13.1             | 6           | 46.0       | L        |
| PACS1    | chr11      | 66,065,352  | 66,249,747  | 16       | -41.1            | 5           | 46.0       | DL       |
| TRAPPC10 | chr21      | 44,007,324  | 44,111,551  | 16       | -17.4            | 7           | 14.0       | L        |
| UTRN     | chr6       | 144,286,736 | 144,858,034 | 16       | 13.8             | 6           | 22.0       | L        |
| CCDC57   | chr17      | 82,096,469  | 82,217,829  | 15       | -46.2            | 6           | 642.5      | DL       |
| CREBBP   | chr16      | 3,720,054   | 3,885,120   | 15       | 33.3             | 5           | 46.0       | L        |
| EHMT1    | chr9       | 137,613,991 | 137,841,126 | 15       | -5.3             | 3           | 50.0       | L        |
| NSD1     | chr5       | 177,128,078 | 177,305,213 | 15       | -32.0            | 6           | 62.0       | DL       |
| ASH1L    | chr1       | 155,330,260 | 155,567,533 | 14       | -34.8            | 5           | 106.0      | DL       |
| ATF7IP   | chr12      | 14,360,631  | 14,507,935  | 14       | 18.4             | 8           | 7.0        | L        |
| DNMT1    | chr19      | 10,128,343  | 10,200,135  | 14       | -24.6            | 13          | 365.0      | DL       |
| DPYD     | chr1       | 97,072,743  | 97,926,059  | 14       | -7.3             | 22          | 122.0      | L        |
| EPB41    | chr1       | 28,882,090  | 29,125,046  | 14       | 52.7             | 7           | 14.0       | E        |
| FCHSD2   | chr11      | 72,831,744  | 73,147,098  | 14       | -14.7            | 5           | 22.0       | L        |
| MACF1    | chr1       | 39,079,166  | 39,492,138  | 14       | -35.7            | 11          | 519.5      | DL       |
| PPP6R2   | chr22      | 50,338,316  | 50,450,089  | 14       | -32.7            | 15          | 136.0      | DL       |
| RABEP1   | chr17      | 5,277,262   | 5,391,339   | 14       | -4.1             | 26          | 14.0       | A        |
| SETD2    | chr3       | 47,011,407  | 47,168,977  | 14       | 2.8              | 17          | 22.0       | L        |
| SMARCC1  | chr3       | 47,580,887  | 47,786,915  | 14       | -4.4             | 3           | 7.0        | L        |
| SMG1     | chr16      | 18,799,852  | 18,931,404  | 14       | -22.4            | 7           | 122.0      | L        |
| SUPT3H   | chr6       | 44,821,729  | 45,383,051  | 14       | 45.5             | 8           | 14.0       | L        |
| VPS13D   | chr1       | 12,225,038  | 12,517,046  | 14       | 54.5             | 3           | 0.0        | E        |
| VPS8     | chr3       | 184,807,142 | 185,057,614 | 14       | 79.0             | 10          | 46.0       | E        |
| CYTH1    | chr17      | 78,669,046  | 78,787,342  | 13       | -35.4            | 4           | 7.0        | DL       |
| ELP4     | chr11      | 31,504,728  | 31,789,525  | 13       | 113.3            | 4           | 0.0        | E        |

Table 9: Table of all genes identified within analysis. (*continued*)

| Gene         | Chromosome | Start Pos.  | End Pos.    | Patients | Freq. Change (%) | Peak Abund. | Long. Obs. | Criteria |
|--------------|------------|-------------|-------------|----------|------------------|-------------|------------|----------|
| FKBP5        | chr6       | 35,568,584  | 35,733,583  | 13       | -51.4            | 15          | 1555.0     | DL       |
| HSF1         | chr8       | 144,286,568 | 144,319,726 | 13       | -39.0            | 10          | 256.0      | DL       |
| INPP4B       | chr4       | 142,018,159 | 142,851,535 | 13       | -11.4            | 3           | 122.0      | L        |
| KMT5B        | chr11      | 68,149,862  | 68,218,772  | 13       | 7.9              | 7           | 642.5      | L        |
| LRBA         | chr4       | 150,259,658 | 151,020,497 | 13       | 42.4             | 17          | 106.0      | L        |
| MECP2        | chrX       | 154,016,812 | 154,102,731 | 13       | -31.0            | 12          | 99.0       | DL       |
| MED13        | chr17      | 61,937,604  | 62,070,282  | 13       | -1.8             | 21          | 152.0      | L        |
| MROH1        | chr8       | 144,143,015 | 144,266,940 | 13       | -50.3            | 5           | 46.0       | DL       |
| NF1          | chr17      | 31,089,926  | 31,382,677  | 13       | 17.3             | 14          | 14.0       | L        |
| PBRM1        | chr3       | 52,540,351  | 52,690,850  | 13       | -24.7            | 14          | 7.0        | L        |
| PELP1        | chr17      | 4,666,383   | 4,709,337   | 13       | 73.5             | 3           | 14.0       | E        |
| RAB11FIP3    | chr16      | 420,667     | 527,481     | 13       | -40.3            | 7           | 46.0       | DL       |
| SAFB2        | chr19      | 5,581,998   | 5,627,927   | 13       | -3.7             | 13          | 22.0       | L        |
| SF1          | chr11      | 64,759,603  | 64,783,844  | 13       | 27.2             | 16          | 14.0       | L        |
| ARHGAP15     | chr2       | 143,124,329 | 143,773,352 | 12       | -1.7             | 7           | 5.0        | L        |
| BOP1         | chr8       | 144,257,045 | 144,296,438 | 12       | -32.4            | 10          | 256.0      | L        |
| CAPN1        | chr11      | 65,176,214  | 65,217,006  | 12       | -26.4            | 2           | 46.0       | L        |
| CHD4         | chr12      | 6,565,081   | 6,612,433   | 12       | 26.3             | 19          | 7.0        | L        |
| CUX1         | chr7       | 101,810,903 | 102,288,958 | 12       | 151.7            | 3           | 0.0        | E        |
| GBE1         | chr3       | 81,484,698  | 81,766,799  | 12       | 155.0            | 9           | 46.0       | E        |
| LOC101929095 | chr4       | 14,999,941  | 15,432,914  | 12       | 185.3            | 14          | 22.0       | E        |
| MAPK8IP3     | chr16      | 1,701,182   | 1,775,317   | 12       | -41.1            | 5           | 130.0      | DL       |
| MGA          | chr15      | 41,655,411  | 41,774,943  | 12       | 11.3             | 85          | 46.0       | A        |
| MIR5096      | chr17      | 4,136,088   | 4,245,637   | 12       | -29.4            | 9           | 14.0       | DL       |
| PARP8        | chr5       | 50,660,898  | 50,851,522  | 12       | 0.8              | 4           | 14.0       | L        |
| RABGAP1L     | chr1       | 174,154,413 | 175,000,308 | 12       | 51.1             | 3           | 46.0       | L        |
| SMG6         | chr17      | 2,054,838   | 2,308,775   | 12       | -30.9            | 16          | 7.0        | DL       |
| SRRM2        | chr16      | 2,747,328   | 2,776,412   | 12       | 45.3             | 32          | 1.0        | A        |
| USP15        | chr12      | 62,255,339  | 62,414,721  | 12       | 49.4             | 14          | 15.0       | L        |
| ZNF34        | chr8       | 144,767,223 | 144,792,345 | 12       | -25.8            | 23          | 1.0        | A        |
| AP3B1        | chr5       | 77,997,325  | 78,299,755  | 11       | 111.9            | 5           | 0.0        | E        |
| CDKAL1       | chr6       | 20,529,456  | 21,237,403  | 11       | 6.0              | 5           | 106.0      | L        |
| CLEC16A      | chr16      | 10,939,487  | 11,187,189  | 11       | 70.8             | 9           | 0.0        | E        |
| CPEB2        | chr4       | 14,997,673  | 15,075,153  | 11       | 215.2            | 14          | 22.0       | E        |
| CSNK1D       | chr17      | 82,237,660  | 82,278,742  | 11       | -25.8            | 8           | 7.0        | L        |
| DDX42        | chr17      | 63,769,188  | 63,824,317  | 11       | -7.3             | 6           | 14.0       | L        |
| DIP2B        | chr12      | 50,499,984  | 50,753,667  | 11       | -34.0            | 4           | 7.0        | L        |
| DLG1         | chr3       | 197,037,559 | 197,304,272 | 11       | -2.4             | 8           | 7.0        | L        |
| GLCCI1       | chr7       | 7,963,742   | 8,094,079   | 11       | 37.4             | 4           | 84.0       | L        |
| HNRNPUL2     | chr11      | 62,707,624  | 62,732,385  | 11       | -20.1            | 9           | 76.0       | L        |
| IQGAP1       | chr15      | 90,383,240  | 90,507,243  | 11       | -9.3             | 5           | 166.0      | L        |

Table 9: Table of all genes identified within analysis. (*continued*)

| Gene         | Chromosome | Start Pos.  | End Pos.    | Patients | Freq. Change (%) | Peak Abund. | Long. Obs. | Criteria |
|--------------|------------|-------------|-------------|----------|------------------|-------------|------------|----------|
| KMT2C        | chr7       | 152,129,924 | 152,441,005 | 11       | -1.5             | 5           | 7.0        | L        |
| MED13L       | chr12      | 115,953,575 | 116,282,186 | 11       | 15.4             | 38          | 7.0        | A        |
| NCOA1        | chr2       | 24,579,476  | 24,775,701  | 11       | -0.5             | 3           | 22.0       | L        |
| PCNX1        | chr14      | 70,902,404  | 71,120,382  | 11       | -9.4             | 153         | 14.0       | A        |
| POT1         | chr7       | 124,817,385 | 124,934,983 | 11       | 46.8             | 26          | 0.0        | A        |
| RBM39        | chr20      | 35,698,608  | 35,747,336  | 11       | 164.9            | 2           | 14.0       | E        |
| SMCHD1       | chr18      | 2,650,886   | 2,810,017   | 11       | -17.6            | 4           | 7.0        | L        |
| STK4         | chr20      | 44,961,473  | 45,084,977  | 11       | -7.3             | 23          | 11.0       | A        |
| STXBP5       | chr6       | 147,199,357 | 147,395,476 | 11       | 49.8             | 8           | 350.0      | L        |
| UBR4         | chr1       | 19,069,505  | 19,215,252  | 11       | 11.3             | 8           | 7.0        | L        |
| ZGPAT        | chr20      | 63,702,441  | 63,741,142  | 11       | -52.7            | 5           | 7.0        | DL       |
| ZNF251       | chr8       | 144,715,908 | 144,760,585 | 11       | -22.9            | 21          | 22.0       | L        |
| ZNF407       | chr18      | 74,625,962  | 75,070,672  | 11       | 109.6            | 3           | 1.0        | E        |
| ADD1         | chr4       | 2,838,856   | 2,935,075   | 10       | -5.6             | 42          | 7.0        | A        |
| ARIH1        | chr15      | 72,469,325  | 72,591,555  | 10       | 85.4             | 5           | 7.0        | L        |
| ATF7         | chr12      | 53,502,855  | 53,631,415  | 10       | -9.8             | 32          | 1.0        | A        |
| CAMK2D       | chr4       | 113,446,031 | 113,766,927 | 10       | 17.1             | 9           | 106.0      | L        |
| CLTC         | chr17      | 59,614,688  | 59,701,956  | 10       | 107.3            | 3           | 1.0        | E        |
| COX6B1       | chr19      | 35,643,222  | 35,663,784  | 10       | -4.6             | 5           | 825.0      | L        |
| DDX60        | chr4       | 168,211,290 | 168,323,807 | 10       | 111.9            | 22          | 122.0      | L        |
| DENND1B      | chr1       | 197,499,748 | 197,780,493 | 10       | -15.2            | 3           | 7.0        | L        |
| FAM117B      | chr2       | 202,630,177 | 202,774,757 | 10       | 68.6             | 6           | 14.0       | E        |
| FBNP1        | chr9       | 129,882,186 | 130,048,194 | 10       | -27.1            | 5           | 256.0      | L        |
| FOXJ3        | chr1       | 42,171,538  | 42,340,877  | 10       | 29.2             | 12          | 7.0        | L        |
| FRYL         | chr4       | 48,492,362  | 48,785,299  | 10       | 27.2             | 24          | 14.0       | A        |
| IL4I1        | chr19      | 49,884,655  | 49,934,539  | 10       | -36.7            | 5           | 46.0       | DL       |
| KIAA1468     | chr18      | 62,182,290  | 62,312,122  | 10       | 34.3             | 17          | 46.0       | L        |
| LOC101926943 | chr7       | 74,683,936  | 74,733,918  | 10       | 106.0            | 7           | 0.0        | E        |
| LRPPRC       | chr2       | 43,881,223  | 44,001,005  | 10       | 363.6            | 7           | 0.0        | E        |
| MOB3A        | chr19      | 2,066,035   | 2,101,270   | 10       | -12.2            | 2           | 22.0       | L        |
| NBEAL1       | chr2       | 203,009,878 | 203,222,994 | 10       | 72.2             | 11          | 14.0       | L        |
| NELL2        | chr12      | 44,503,274  | 44,918,928  | 10       | 39.1             | 2           | 4.0        | L        |
| NOSIP        | chr19      | 49,550,467  | 49,585,572  | 10       | -63.6            | 29          | 0.0        | DA       |
| PHF3         | chr6       | 63,630,801  | 63,720,522  | 10       | 164.9            | 7           | 4.0        | E        |
| PLEC         | chr8       | 143,910,146 | 143,981,745 | 10       | -59.4            | 11          | 22.0       | DL       |
| PLEKHA5      | chr12      | 19,124,691  | 19,381,399  | 10       | 41.8             | 2           | 7.0        | L        |
| COP1         | chr1       | 175,939,825 | 176,212,244 | 10       | 125.2            | 3           | 14.0       | E        |
| RUNX2        | chr6       | 45,323,316  | 45,556,082  | 10       | 94.3             | 8           | 14.0       | E        |
| SLC6A16      | chr19      | 49,284,634  | 49,330,217  | 10       | -8.7             | 2           | 14.0       | L        |
| SNAPC4       | chr9       | 136,370,568 | 136,403,437 | 10       | 29.8             | 7           | 166.0      | L        |
| SNX13        | chr7       | 17,785,760  | 17,945,508  | 10       | 85.4             | 5           | 14.0       | E        |



Table 9: Table of all genes identified within analysis. (continued)

| Gene     | Chromosome | Start Pos.  | End Pos.    | Patients | Freq. Change (%) | Peak Abund. | Long. Obs. | Criteria |
|----------|------------|-------------|-------------|----------|------------------|-------------|------------|----------|
| TANC2    | chr17      | 63,004,536  | 63,432,706  | 10       | 105.0            | 11          | 7.0        | E        |
| TCF20    | chr22      | 42,155,012  | 42,288,927  | 10       | -7.3             | 10          | 7.0        | L        |
| TRAPPC8  | chr18      | 31,824,172  | 31,948,128  | 10       | 49.8             | 4           | 7.0        | L        |
| UBAC2    | chr13      | 99,195,424  | 99,391,499  | 10       | 36.0             | 4           | 14.0       | L        |
| VMP1     | chr17      | 59,702,464  | 59,847,255  | 10       | -36.2            | 28          | 46.0       | DA       |
| VPS52    | chr6       | 33,245,271  | 33,276,965  | 10       | -9.2             | 10          | 106.0      | L        |
| WDR82    | chr3       | 52,249,421  | 52,283,643  | 10       | 3.0              | 7           | 277.5      | L        |
| ZFC3H1   | chr12      | 71,604,600  | 71,668,969  | 10       | 136.0            | 4           | 0.0        | E        |
| ADK      | chr10      | 74,146,184  | 74,714,303  | 9        | -16.1            | 3           | 7.0        | L        |
| AP2B1    | chr17      | 35,582,262  | 35,731,417  | 9        | 39.1             | 13          | 90.0       | L        |
| ASXL2    | chr2       | 25,728,752  | 25,883,516  | 9        | -41.0            | 3           | 7.0        | L        |
| ATG5     | chr6       | 106,179,476 | 106,330,820 | 9        | 252.3            | 2           | 0.0        | E        |
| BCAS3    | chr17      | 60,672,774  | 61,397,838  | 9        | -34.8            | 2           | 7.0        | L        |
| C6orf106 | chr6       | 34,582,279  | 34,701,850  | 9        | -11.9            | 3           | 46.0       | L        |
| CAMK4    | chr5       | 111,218,652 | 111,499,884 | 9        | 4.3              | 9           | 7.0        | L        |
| DAP3     | chr1       | 155,684,090 | 155,744,009 | 9        | 131.8            | 2           | 0.0        | E        |
| DAZAP1   | chr19      | 1,402,568   | 1,440,687   | 9        | -32.6            | 2           | 4.0        | L        |
| DNAJC13  | chr3       | 132,412,659 | 132,544,032 | 9        | 98.7             | 71          | 7.0        | A        |
| ERC1     | chr12      | 986,207     | 1,500,933   | 9        | 3.5              | 4           | 7.0        | L        |
| FOCAD    | chr9       | 20,653,308  | 21,000,955  | 9        | 140.0            | 17          | 7.0        | E        |
| FRG1BP   | chr20      | 30,372,163  | 30,424,842  | 9        | 224.5            | 4           | 7.0        | E        |
| GAK      | chr4       | 844,274     | 937,390     | 9        | 156.8            | 4           | 14.0       | E        |
| GANAB    | chr11      | 62,619,825  | 62,651,726  | 9        | -19.6            | 6           | 7.0        | L        |
| GPBP1L1  | chr1       | 45,622,303  | 45,691,630  | 9        | -38.2            | 2           | 46.0       | L        |
| GPHN     | chr14      | 66,502,406  | 67,186,808  | 9        | 131.8            | 2           | 0.0        | E        |
| HNRNPUL1 | chr19      | 41,257,475  | 41,312,783  | 9        | 68.6             | 4           | 14.0       | L        |
| HTT      | chr4       | 3,069,680   | 3,248,960   | 9        | 6.0              | 25          | 1.0        | A        |
| KDM4A    | chr1       | 43,645,125  | 43,710,518  | 9        | 215.2            | 7           | 0.0        | E        |
| KIF20B   | chr10      | 89,696,589  | 89,779,943  | 9        | 167.9            | 13          | 0.0        | E        |
| LCOR     | chr10      | 96,827,259  | 96,991,212  | 9        | 113.3            | 4           | 0.0        | E        |
| MUM1     | chr19      | 1,349,976   | 1,383,431   | 9        | -43.7            | 4           | 90.0       | DL       |
| NAA38    | chr17      | 7,851,680   | 7,890,388   | 9        | -36.3            | 15          | 14.0       | DL       |
| NDUFV2   | chr18      | 9,097,629   | 9,139,345   | 9        | 119.2            | 15          | 22.0       | L        |
| NEAT1    | chr11      | 65,417,797  | 65,450,538  | 9        | 2.0              | 4           | 22.0       | L        |
| NEMP1    | chr12      | 57,050,642  | 57,083,791  | 9        | -16.9            | 10          | 46.0       | L        |
| NUP107   | chr12      | 68,681,950  | 68,750,814  | 9        | 456.3            | 4           | 0.0        | E        |
| NUP214   | chr9       | 131,120,560 | 131,239,670 | 9        | -2.1             | 8           | 106.0      | L        |
| PDCD10   | chr3       | 167,678,905 | 167,739,863 | 9        | 410.0            | 4           | 0.0        | E        |
| PHF20L1  | chr8       | 132,770,357 | 132,853,807 | 9        | 54.5             | 4           | 22.0       | L        |
| POGZ     | chr1       | 151,397,723 | 151,464,465 | 9        | 23.6             | 26          | 0.0        | A        |
| POLA2    | chr11      | 65,256,851  | 65,303,685  | 9        | -20.5            | 9           | 7.0        | L        |

Table 9: Table of all genes identified within analysis. (*continued*)

| Gene      | Chromosome | Start Pos.  | End Pos.    | Patients | Freq. Change (%) | Peak Abund. | Long. Obs. | Criteria |
|-----------|------------|-------------|-------------|----------|------------------|-------------|------------|----------|
| PTPRA     | chr20      | 2,859,194   | 3,043,669   | 9        | -13.3            | 4           | 1555.0     | L        |
| RAB11FIP2 | chr10      | 117,999,915 | 118,051,884 | 9        | 456.3            | 19          | 1.0        | E        |
| RBPJ      | chr4       | 26,314,709  | 26,440,130  | 9        | 209.1            | 2           | 0.0        | E        |
| RNF216    | chr7       | 5,615,040   | 5,786,730   | 9        | -48.5            | 15          | 106.0      | DL       |
| ROCK1     | chr18      | 20,944,741  | 21,116,851  | 9        | 93.9             | 13          | 14.0       | E        |
| RTTN      | chr18      | 69,998,805  | 70,210,726  | 9        | 2.3              | 6           | 136.0      | L        |
| RUNX1     | chr21      | 34,782,800  | 35,054,298  | 9        | 6.8              | 1           | 110.0      | L        |
| SEPT7     | chr7       | 35,795,985  | 35,912,105  | 9        | 107.3            | 10          | 7.0        | E        |
| MTREX     | chr5       | 55,302,747  | 55,430,581  | 9        | 162.7            | 6           | 0.0        | E        |
| SNTB1     | chr8       | 120,530,744 | 120,817,069 | 9        | 147.3            | 3           | 4.0        | E        |
| SPEN      | chr1       | 15,842,863  | 15,945,455  | 9        | 2.3              | 2           | 7.0        | L        |
| STAG1     | chr3       | 136,332,156 | 136,757,403 | 9        | 29.8             | 6           | 136.0      | L        |
| TARSL2    | chr15      | 101,648,751 | 101,729,442 | 9        | 71.2             | 22          | 7.0        | L        |
| THEMIS    | chr6       | 127,703,193 | 127,923,631 | 9        | -16.0            | 5           | 106.0      | L        |
| TONSL     | chr8       | 144,423,779 | 144,449,429 | 9        | -29.9            | 7           | 7.0        | L        |
| TTC21B    | chr2       | 165,868,361 | 165,958,838 | 9        | 15.9             | 5           | 46.0       | L        |
| TUT1      | chr11      | 62,570,044  | 62,596,637  | 9        | -31.3            | 5           | 7.0        | L        |
| UR11      | chr19      | 29,918,643  | 30,021,612  | 9        | 199.6            | 6           | 1.0        | E        |
| WWP1      | chr8       | 86,337,764  | 86,472,949  | 9        | 172.0            | 4           | 7.0        | E        |
| ZC3H13    | chr13      | 45,949,464  | 46,057,778  | 9        | 152.9            | 6           | 46.0       | E        |
| ABCD2     | chr12      | 39,546,219  | 39,625,041  | 8        | 131.8            | 8           | 14.0       | E        |
| ACOX1     | chr17      | 75,936,510  | 75,984,434  | 8        | -21.7            | 2           | 256.0      | L        |
| ASCC3     | chr6       | 100,503,194 | 100,886,372 | 8        | 178.2            | 4           | 7.0        | E        |
| ATP2A2    | chr12      | 110,276,226 | 110,356,092 | 8        | 12.9             | 67          | 22.0       | A        |
| ATP8A1    | chr4       | 42,403,374  | 42,662,105  | 8        | 33.5             | 4           | 14.0       | L        |
| AUH       | chr9       | 91,208,814  | 91,366,969  | 8        | 29.0             | 23          | 7.0        | A        |
| CASK      | chrX       | 41,509,935  | 41,928,034  | 8        | -4.5             | 5           | 346.0      | L        |
| DOT1L     | chr19      | 2,159,148   | 2,237,578   | 8        | -18.1            | 6           | 14.0       | L        |
| DYNC1H1   | chr14      | 101,959,527 | 102,055,798 | 8        | 71.2             | 44          | 7.0        | A        |
| EED       | chr11      | 86,239,383  | 86,283,810  | 8        | 136.0            | 6           | 14.0       | E        |
| HSF2      | chr6       | 122,394,550 | 122,438,119 | 8        | 419.2            | 15          | 14.0       | E        |
| IKZF2     | chr2       | 212,994,685 | 213,156,609 | 8        | 201.3            | 1           | 0.0        | E        |
| KLRG1     | chr12      | 8,945,043   | 9,015,744   | 8        | -11.0            | 3           | 7.0        | L        |
| LUC7L2    | chr7       | 139,335,358 | 139,428,457 | 8        | 209.1            | 4           | 14.0       | E        |
| MAP4K3    | chr2       | 39,244,265  | 39,442,312  | 8        | 29.8             | 15          | 46.0       | L        |
| MMP23A    | chr1       | 1,627,779   | 1,706,808   | 8        | 5.1              | 17          | 14.0       | L        |
| NBAS      | chr2       | 15,161,907  | 15,566,348  | 8        | 6.0              | 4           | 106.0      | L        |
| NCOA3     | chr20      | 47,496,856  | 47,661,877  | 8        | -35.1            | 6           | 7.0        | L        |
| NUP62     | chr19      | 49,901,825  | 49,934,731  | 8        | -40.1            | 5           | 46.0       | DL       |
| PDS5B     | chr13      | 32,581,426  | 32,783,020  | 8        | 85.4             | 10          | 256.0      | L        |
| PPP1R16A  | chr8       | 144,472,981 | 144,507,121 | 8        | -36.6            | 4           | 7.0        | L        |

Table 9: Table of all genes identified within analysis. (continued)

| Gene    | Chromosome | Start Pos.  | End Pos.    | Patients | Freq. Change (%) | Peak Abund. | Long. Obs. | Criteria |
|---------|------------|-------------|-------------|----------|------------------|-------------|------------|----------|
| RAD51B  | chr14      | 67,814,778  | 68,688,106  | 8        | -21.5            | 2           | 22.0       | L        |
| RBL2    | chr16      | 53,429,419  | 53,496,648  | 8        | 102.3            | 8           | 14.0       | L        |
| SLX4IP  | chr20      | 10,430,302  | 10,633,034  | 8        | 102.3            | 3           | 7.0        | L        |
| SPG7    | chr16      | 89,503,387  | 89,562,768  | 8        | -30.5            | 10          | 7.0        | L        |
| SYNE2   | chr14      | 63,847,964  | 64,231,451  | 8        | 65.9             | 8           | 22.0       | L        |
| UBE2L3  | chr22      | 21,544,446  | 21,629,034  | 8        | 52.7             | 3           | 7.0        | L        |
| UBR5    | chr8       | 102,247,273 | 102,417,689 | 8        | 21.2             | 19          | 7.0        | L        |
| VPS28   | chr8       | 144,418,600 | 144,433,563 | 8        | 9.1              | 7           | 7.0        | L        |
| VRK3    | chr19      | 49,971,466  | 50,030,548  | 8        | -34.6            | 2           | 7.0        | L        |
| YTHDF3  | chr8       | 63,163,552  | 63,217,788  | 8        | 70.0             | 13          | 7.0        | L        |
| ANXA1   | chr9       | 73,146,730  | 73,175,394  | 7        | 155.0            | 5           | 14.0       | L        |
| ATE1    | chr10      | 121,735,420 | 121,933,801 | 7        | 240.0            | 14          | 46.0       | E        |
| BCKDHB  | chr6       | 80,101,609  | 80,351,270  | 7        | 240.0            | 3           | 0.0        | E        |
| CCDC47  | chr17      | 63,740,249  | 63,778,728  | 7        | -42.1            | 6           | 22.0       | L        |
| CDC73   | chr1       | 193,116,957 | 193,259,812 | 7        | 150.9            | 19          | 7.0        | E        |
| CDK8    | chr13      | 26,249,103  | 26,410,236  | 7        | 209.1            | 1           | 0.0        | E        |
| CHMP2B  | chr3       | 87,222,262  | 87,260,548  | 7        | 85.4             | 24          | 7.0        | A        |
| CLASP2  | chr3       | 33,491,245  | 33,723,213  | 7        | 36.6             | 5           | 7.0        | L        |
| DERL2   | chr17      | 5,466,250   | 5,491,230   | 7        | 48.4             | 37          | 0.0        | A        |
| DNAJC1  | chr10      | 21,751,547  | 22,008,721  | 7        | 4.3              | 38          | 7.0        | A        |
| GATAD2B | chr1       | 153,799,906 | 153,927,975 | 7        | -43.3            | 2           | 7.0        | DL       |
| GTDC1   | chr2       | 143,941,013 | 144,337,534 | 7        | 138.4            | 9           | 7.0        | E        |
| INO80   | chr15      | 40,973,880  | 41,121,246  | 7        | -25.8            | 3           | 14.0       | L        |
| KMT2D   | chr12      | 49,013,974  | 49,060,324  | 7        | 12.6             | 33          | 0.0        | A        |
| LSM2    | chr6       | 31,792,391  | 31,811,984  | 7        | -67.0            | 2           | 14.0       | DL       |
| MACROD2 | chr20      | 13,990,499  | 16,058,196  | 7        | 224.5            | 1           | 0.0        | E        |
| MATR3   | chr5       | 139,268,751 | 139,336,677 | 7        | 125.2            | 6           | 1.0        | E        |
| MIR5096 | chr1       | 15,866,148  | 15,910,467  | 7        | 11.3             | 2           | 7.0        | DL       |
| NFKBIL1 | chr6       | 31,541,850  | 31,563,829  | 7        | -47.0            | 4           | 7.0        | DL       |
| OPRM1   | chr6       | 154,005,495 | 154,251,867 | 7        | 20.0             | 3           | 14.0       | L        |
| PAG1    | chr8       | 80,962,810  | 81,117,068  | 7        | -13.9            | 2           | 32.0       | L        |
| PCNT    | chr21      | 46,319,121  | 46,450,769  | 7        | 6.0              | 5           | 4.0        | L        |
| PDE12   | chr3       | 57,551,246  | 57,661,480  | 7        | 201.3            | 3           | 0.0        | E        |
| PDE7A   | chr8       | 65,709,333  | 65,846,734  | 7        | -10.5            | 4           | 7.0        | L        |
| PHACTR4 | chr1       | 28,364,581  | 28,505,369  | 7        | -38.2            | 3           | 22.0       | L        |
| PPP4R2  | chr3       | 72,991,742  | 73,074,201  | 7        | 240.0            | 2           | 7.0        | E        |
| PRKCA   | chr17      | 66,297,807  | 66,815,744  | 7        | 62.3             | 7           | 7.0        | L        |
| PRKN    | chr6       | 161,342,557 | 162,732,802 | 7        | 191.4            | 3           | 0.0        | E        |
| RAD23B  | chr9       | 107,278,235 | 107,337,194 | 7        | 363.6            | 2           | 0.0        | E        |
| RASA1   | chr5       | 87,263,252  | 87,396,926  | 7        | 140.0            | 3           | 0.0        | E        |
| RFX2    | chr19      | 5,988,163   | 6,115,653   | 7        | -33.4            | 9           | 106.0      | L        |

Table 9: Table of all genes identified within analysis. (*continued*)

| Gene     | Chromosome | Start Pos.  | End Pos.    | Patients | Freq. Change (%) | Peak Abund. | Long. Obs. | Criteria |
|----------|------------|-------------|-------------|----------|------------------|-------------|------------|----------|
| RIPOR2   | chr6       | 24,799,280  | 25,047,288  | 7        | -16.3            | 10          | 7.0        | L        |
| SNORA30  | chr16      | 30,705,536  | 30,715,665  | 7        | 54.5             | 373         | 332.0      | L        |
| SPPL3    | chr12      | 120,757,509 | 120,909,352 | 7        | -35.5            | 9           | 14.0       | L        |
| SYNE1    | chr6       | 152,116,683 | 152,642,399 | 7        | 36.6             | 22          | 46.0       | L        |
| TCF25    | chr16      | 89,868,585  | 89,916,384  | 7        | -35.1            | 5           | 106.0      | L        |
| UBE2J2   | chr1       | 1,248,911   | 1,278,854   | 7        | -62.4            | 2           | 166.0      | DL       |
| UCHL3    | chr13      | 75,544,479  | 75,611,020  | 7        | 217.9            | 6           | 7.0        | E        |
| UNKL     | chr16      | 1,358,204   | 1,419,720   | 7        | 15.9             | 7           | 15.0       | L        |
| USP9Y    | chrY       | 12,696,230  | 12,865,843  | 7        | 209.1            | 4           | 18.0       | E        |
| ZNF473   | chr19      | 50,020,892  | 50,053,774  | 7        | -7.3             | 3           | 22.0       | L        |
| ABLIM1   | chr10      | 114,426,109 | 114,773,225 | 6        | 308.0            | 6           | 14.0       | E        |
| ARHGAP12 | chr10      | 31,800,397  | 31,933,876  | 6        | 270.9            | 3           | 14.0       | E        |
| ATP9B    | chr18      | 79,064,274  | 79,383,282  | 6        | 13.3             | 2           | 7.0        | L        |
| BAG6     | chr6       | 31,634,027  | 31,657,700  | 6        | -32.2            | 36          | 46.0       | A        |
| BZW2     | chr7       | 16,641,133  | 16,711,523  | 6        | 209.1            | 6           | 0.0        | E        |
| CAMKMT   | chr2       | 44,356,903  | 44,777,592  | 6        | 308.0            | 9           | 0.0        | E        |
| CEP85L   | chr6       | 118,455,771 | 118,715,075 | 6        | -15.7            | 3           | 46.0       | L        |
| EP400P1  | chr12      | 132,079,282 | 132,131,340 | 6        | 66.9             | 5           | 260.0      | L        |
| EVL      | chr14      | 99,966,474  | 100,149,236 | 6        | -23.3            | 4           | 7.0        | L        |
| FUNDC2   | chrX       | 155,021,788 | 155,061,916 | 6        | 201.3            | 9           | 46.0       | E        |
| GNA12    | chr7       | 2,723,105   | 2,849,325   | 6        | 240.0            | 2           | 0.0        | E        |
| HERC2    | chr15      | 28,106,036  | 28,327,152  | 6        | 518.1            | 4           | 1.0        | E        |
| HSF5     | chr17      | 58,415,166  | 58,493,401  | 6        | -7.3             | 34          | 1.0        | A        |
| MARF1    | chr16      | 15,589,368  | 15,648,166  | 6        | 75.7             | 17          | 106.0      | L        |
| KIFC1    | chr6       | 33,386,535  | 33,414,922  | 6        | -2.9             | 42          | 7.0        | A        |
| MBD3     | chr19      | 1,571,670   | 1,597,761   | 6        | 58.9             | 2           | 7.0        | L        |
| MIR5096  | chr22      | 37,663,025  | 38,029,093  | 6        | -50.8            | 6           | 7.0        | DL       |
| N4BP1    | chr16      | 48,533,725  | 48,615,209  | 6        | 85.4             | 32          | 106.0      | A        |
| OXCT1    | chr5       | 41,725,064  | 41,875,689  | 6        | 54.5             | 3           | 7.0        | L        |
| PAPOLA   | chr14      | 96,497,375  | 96,572,116  | 6        | 128.2            | 3           | 0.0        | E        |
| PHF20    | chr20      | 35,767,000  | 35,955,366  | 6        | -24.7            | 38          | 7.0        | A        |
| PPFIA1   | chr11      | 70,265,699  | 70,389,501  | 6        | 23.6             | 20          | 106.0      | L        |
| PPP1CB   | chr2       | 28,746,747  | 28,807,940  | 6        | -25.8            | 23          | 22.0       | A        |
| PTGES3   | chr12      | 56,658,340  | 56,693,408  | 6        | -47.0            | 23          | 1.0        | A        |
| RAB18    | chr10      | 27,499,173  | 27,547,237  | 6        | 29.8             | 24          | 7.0        | A        |
| RBM27    | chr5       | 146,198,599 | 146,294,221 | 6        | 345.1            | 3           | 0.0        | E        |
| RPRD2    | chr1       | 150,359,110 | 150,481,565 | 6        | -53.6            | 6           | 14.0       | DL       |
| RSBN1L   | chr7       | 77,691,425  | 77,784,803  | 6        | 48.4             | 31          | 1.0        | A        |
| SEC23A   | chr14      | 39,026,918  | 39,108,528  | 6        | 33.9             | 7           | 7.0        | L        |
| SEC31A   | chr4       | 82,813,508  | 82,905,571  | 6        | 29.8             | 66          | 7.0        | A        |
| SFI1     | chr22      | 31,491,138  | 31,623,551  | 6        | -63.6            | 24          | 7.0        | DA       |

Table 9: Table of all genes identified within analysis. (continued)

| Gene        | Chromosome | Start Pos.  | End Pos.    | Patients | Freq. Change (%) | Peak Abund. | Long. Obs. | Criteria |
|-------------|------------|-------------|-------------|----------|------------------|-------------|------------|----------|
| SMAP2       | chr1       | 40,368,705  | 40,428,326  | 6        | -7.3             | 61          | 7.0        | A        |
| TMTC3       | chr12      | 88,137,295  | 88,204,887  | 6        | 301.8            | 2           | 0.0        | E        |
| TNKS        | chr8       | 9,550,934   | 9,787,346   | 6        | 162.7            | 8           | 7.0        | E        |
| TRIM33      | chr1       | 114,387,776 | 114,516,160 | 6        | 104.0            | 17          | 106.0      | L        |
| UBE2F-SCLY  | chr2       | 237,961,944 | 238,104,413 | 6        | -7.3             | 6           | 46.0       | L        |
| WWOX        | chr16      | 78,094,412  | 79,217,667  | 6        | 39.1             | 5           | 106.0      | L        |
| ZNRD1ASP    | chr6       | 29,996,010  | 30,066,189  | 6        | -7.3             | 4           | 122.0      | L        |
| ANKRD46     | chr8       | 100,504,751 | 100,564,786 | 5        | -14.4            | 24          | 7.0        | A        |
| AQR         | chr15      | 34,851,350  | 34,974,794  | 5        | 23.6             | 84          | 14.0       | A        |
| CNOT6       | chr5       | 180,489,398 | 180,583,405 | 5        | -56.6            | 2           | 7.0        | DL       |
| CSNK1G1     | chr15      | 64,160,516  | 64,361,259  | 5        | -19.4            | 8           | 7.0        | L        |
| ELMO1       | chr7       | 36,847,905  | 37,454,326  | 5        | -38.2            | 34          | 46.0       | A        |
| FANCL       | chr2       | 58,154,242  | 58,246,380  | 5        | 191.4            | 6           | 0.0        | E        |
| FUS         | chr16      | 31,175,109  | 31,199,871  | 5        | 217.9            | 12          | 0.0        | E        |
| IQCB1       | chr3       | 121,764,760 | 121,840,079 | 5        | 85.4             | 79          | 15.0       | A        |
| KDM5D       | chrY       | 19,700,414  | 19,749,939  | 5        | 178.2            | 2           | 14.0       | A        |
| MAP2K2      | chr19      | 4,085,321   | 4,129,129   | 5        | -32.0            | 2           | 106.0      | L        |
| MEMO1       | chr2       | 31,862,809  | 32,016,052  | 5        | -51.2            | 47          | 7.0        | A        |
| MIR5096     | chr1       | 235,507,822 | 235,723,113 | 5        | 116.3            | 1           | 0.0        | DL       |
| NAP1L1      | chr12      | 76,039,744  | 76,090,033  | 5        | 196.7            | 23          | 7.0        | A        |
| NHLRC2      | chr10      | 113,849,631 | 113,917,506 | 5        | 44.2             | 23          | 7.0        | A        |
| OGDH        | chr7       | 44,601,521  | 44,714,070  | 5        | -44.4            | 17          | 332.0      | L        |
| POM121      | chr7       | 72,874,334  | 72,956,440  | 5        | 224.5            | 29          | 1.0        | A        |
| QKI         | chr6       | 163,409,642 | 163,583,596 | 5        | 45.7             | 3           | 7.0        | L        |
| RMND5A      | chr2       | 86,715,290  | 86,783,041  | 5        | 15.9             | 26          | 0.0        | A        |
| RPA3        | chr7       | 7,631,562   | 7,723,607   | 5        | 85.4             | 87          | 106.0      | A        |
| SEPT9       | chr17      | 77,276,409  | 77,505,596  | 5        | -57.6            | 27          | 7.0        | A        |
| SNRPA       | chr19      | 40,745,853  | 40,770,392  | 5        | 209.1            | 19          | 7.0        | E        |
| STAG3       | chr7       | 100,172,723 | 100,219,387 | 5        | -11.3            | 35          | 0.0        | A        |
| STX8        | chr17      | 9,245,470   | 9,580,958   | 5        | -2.4             | 4           | 7.0        | L        |
| XPO1        | chr2       | 61,472,933  | 61,543,283  | 5        | 85.4             | 25          | 106.0      | A        |
| AKAP9       | chr7       | 91,935,874  | 92,115,673  | 4        | -1.8             | 25          | 0.0        | A        |
| CAAP1       | chr9       | 26,835,684  | 26,897,828  | 4        | -7.3             | 27          | 46.0       | A        |
| EHMT1       | chr9       | 137,758,021 | 137,769,772 | 4        | 131.8            | 1           | 0.0        | L        |
| EXOSC10     | chr1       | 11,061,612  | 11,104,910  | 4        | -0.1             | 70          | 7.0        | A        |
| GOLPH3L     | chr1       | 150,641,224 | 150,702,196 | 4        | -53.6            | 24          | 7.0        | A        |
| ITM2B       | chr13      | 48,228,137  | 48,267,096  | 4        | -7.3             | 23          | 7.0        | A        |
| MSH5-SAPCD1 | chr6       | 31,734,947  | 31,769,847  | 4        | -62.9            | 43          | 7.0        | A        |
| PATL1       | chr11      | 59,631,715  | 59,674,038  | 4        | -7.3             | 578         | 332.0      | A        |
| PDCD11      | chr10      | 103,391,654 | 103,451,262 | 4        | 6.0              | 27          | 152.0      | A        |
| PDE3B       | chr11      | 14,638,722  | 14,877,058  | 4        | 2.3              | 35          | 7.0        | A        |

Table 9: Table of all genes identified within analysis. (continued)

| Gene         | Chromosome | Start Pos.  | End Pos.    | Patients | Freq. Change (%) | Peak Abund. | Long. Obs. | Criteria |
|--------------|------------|-------------|-------------|----------|------------------|-------------|------------|----------|
| RABGAP1      | chr9       | 122,936,008 | 123,109,868 | 4        | 6.0              | 29          | 7.0        | A        |
| TRIO         | chr5       | 14,138,701  | 14,515,204  | 4        | 332.7            | 61          | 106.0      | A        |
| CHD1L        | chr1       | 147,168,193 | 147,300,766 | 3        | 641.8            | 25          | 1.0        | A        |
| DCUN1D4      | chr4       | 51,837,999  | 51,921,837  | 3        | -22.7            | 32          | 106.0      | A        |
| EIF2AK4      | chr15      | 39,929,123  | 40,040,596  | 3        | 54.5             | 43          | 7.0        | A        |
| GPN1         | chr2       | 27,623,647  | 27,655,846  | 3        | 11.3             | 62          | 1.0        | A        |
| KCTD3        | chr1       | 215,562,378 | 215,626,821 | 3        | 39.1             | 1           | 0.0        | A        |
| LOC101927151 | chr19      | 27,788,466  | 27,811,780  | 3        | 456.3            | 31          | 46.0       | A        |
| NGDN         | chr14      | 23,464,688  | 23,483,193  | 3        | 39.1             | 44          | 0.0        | A        |
| POLG2        | chr17      | 64,472,784  | 64,502,066  | 3        | 116.3            | 43          | 7.0        | A        |
| PRKD2        | chr19      | 46,669,315  | 46,722,127  | 3        | -45.5            | 24          | 22.0       | A        |
| SNAP29       | chr22      | 20,854,003  | 20,896,213  | 3        | 147.3            | 27          | 7.0        | A        |
| ZNF573       | chr19      | 37,733,301  | 37,784,590  | 3        | -25.8            | 86          | 735.0      | A        |
| C20orf196    | chr20      | 5,745,386   | 5,869,407   | 2        | -47.0            | 1           | 0.0        | A        |
| CRTAP        | chr3       | 33,108,957  | 33,152,773  | 2        | 270.9            | 35          | 7.0        | A        |
| GRSF1        | chr4       | 70,810,781  | 70,844,910  | 2        | Inf              | 23          | 0.0        | A        |
| JMJD6        | chr17      | 76,707,831  | 76,731,799  | 2        | 164.9            | 53          | 1.0        | A        |
| LINC01473    | chr2       | 186,028,533 | 186,091,317 | 2        | Inf              | 82          | 7.0        | A        |
| PHF12        | chr17      | 28,900,252  | 28,956,490  | 2        | -42.9            | 40          | 106.0      | A        |
| RASEF        | chr9       | 82,974,584  | 83,068,128  | 2        | Inf              | 43          | 46.0       | A        |
| SNHG12       | chr1       | 28,573,537  | 28,586,854  | 2        | 456.3            | 96          | 332.0      | A        |
| TAC3         | chr12      | 57,004,996  | 57,021,560  | 2        | -71.5            | 42          | 7.0        | A        |
| TGFBR2       | chr3       | 30,601,501  | 30,699,141  | 2        | 23.6             | 31          | 7.0        | A        |
| ACTL6A       | chr3       | 179,557,879 | 179,593,405 | 1        | -69.1            | 40          | 0.0        | A        |
| C19orf48     | chr19      | 50,792,692  | 50,809,853  | 1        | -53.6            | 28          | 46.0       | A        |
| CD109        | chr6       | 73,691,084  | 73,833,317  | 1        | -85.7            | 32          | 0.0        | A        |
| IFNGR2       | chr21      | 33,397,895  | 33,442,521  | 1        | Inf              | 53          | 15.0       | A        |
| KARS         | chr16      | 75,622,723  | 75,652,687  | 1        | -7.3             | 24          | 0.0        | A        |
| LOC101927501 | chrX       | 43,171,993  | 43,231,598  | 1        | Inf              | 23          | 1.0        | A        |
| MICAL2       | chr11      | 12,105,575  | 12,268,790  | 1        | -73.5            | 39          | 15.0       | A        |
| RBAK-RBAKDN  | chr7       | 5,040,820   | 5,078,223   | 1        | -53.6            | 28          | 7.0        | A        |
| RTCA-AS1     | chr1       | 100,259,741 | 100,271,174 | 1        | Inf              | 27          | 0.0        | A        |
| UXT-AS1      | chrX       | 47,653,832  | 47,665,111  | 1        | 85.4             | 43          | 7.0        | A        |
| ZNF92        | chr7       | 65,368,798  | 65,406,135  | 1        | Inf              | 42          | 7.0        | A        |
| TNRC6B       | chr22      | 40,039,816  | 40,340,808  | 17       | -29.3            | 10          | 46.0       | D        |
| RBM6         | chr3       | 49,935,043  | 50,082,252  | 15       | -31.8            | 7           | 1.0        | D        |
| MIR1268A     | chr9       | 128,347,046 | 128,667,136 | 14       | -29.8            | 4           | 1.0        | D        |
| NFATC3       | chr16      | 68,080,365  | 68,234,259  | 14       | -30.6            | 4           | 4.0        | D        |
| CCNL2        | chr1       | 1,380,710   | 1,404,338   | 13       | -32.6            | 8           | 22.0       | D        |
| NUP188       | chr9       | 128,942,692 | 129,012,096 | 13       | -38.9            | 12          | 1.0        | D        |
| IKZF3        | chr17      | 39,752,714  | 39,869,188  | 12       | -38.2            | 4           | 46.0       | D        |

Table 9: Table of all genes identified within analysis. (continued)

| Gene       | Chromosome | Start Pos.  | End Pos.    | Patients | Freq. Change (%) | Peak Abund. | Long. Obs. | Criteria |
|------------|------------|-------------|-------------|----------|------------------|-------------|------------|----------|
| UBE2G1     | chr17      | 4,264,216   | 4,371,674   | 12       | -33.8            | 3           | 14.0       | D        |
| FO XK2     | chr17      | 82,514,717  | 82,609,607  | 11       | -40.2            | 19          | 0.0        | D        |
| IP6K1      | chr3       | 49,719,294  | 49,791,540  | 11       | -61.3            | 2           | 1.0        | D        |
| RABL6      | chr9       | 136,802,921 | 136,846,187 | 11       | -36.7            | 11          | 0.0        | D        |
| CCND3      | chr6       | 41,929,932  | 42,053,894  | 10       | -57.0            | 3           | 0.0        | D        |
| EIF2B3     | chr1       | 44,845,521  | 44,991,722  | 10       | -61.1            | 6           | 1.0        | D        |
| R3HDM2     | chr12      | 57,248,763  | 57,436,005  | 10       | -41.0            | 2           | 0.0        | D        |
| RERE       | chr1       | 8,347,403   | 8,822,640   | 10       | -46.7            | 5           | 0.0        | D        |
| SP1        | chr12      | 53,375,194  | 53,421,442  | 10       | -47.9            | 10          | 0.0        | D        |
| STAT5B     | chr17      | 42,194,176  | 42,281,406  | 10       | -42.2            | 2           | 0.0        | D        |
| TRAF2      | chr9       | 136,881,512 | 136,931,615 | 10       | -49.6            | 4           | 46.0       | D        |
| ABHD16A    | chr6       | 31,681,948  | 31,708,360  | 9        | -51.2            | 6           | 0.0        | D        |
| CEACAM21   | chr19      | 41,544,517  | 41,591,844  | 9        | -49.2            | 2           | 0.0        | D        |
| HCG20      | chr6       | 30,761,824  | 30,797,250  | 9        | -52.6            | 4           | 22.0       | D        |
| ITGAL      | chr16      | 30,467,661  | 30,528,185  | 9        | -45.5            | 14          | 14.0       | D        |
| NARFL      | chr16      | 724,754     | 746,038     | 9        | -58.8            | 3           | 22.0       | D        |
| PSMB9      | chr6       | 32,849,160  | 32,864,851  | 9        | -55.4            | 2           | 0.0        | D        |
| RBM4       | chr11      | 66,633,616  | 66,673,386  | 9        | -48.7            | 6           | 11.0       | D        |
| TSC2       | chr16      | 2,042,894   | 2,093,720   | 9        | -53.6            | 1           | 22.0       | D        |
| HORMAD2    | chr22      | 30,075,068  | 30,182,075  | 8        | -54.1            | 4           | 7.0        | D        |
| IFT140     | chr16      | 1,505,426   | 1,617,108   | 8        | -57.5            | 3           | 7.0        | D        |
| PPP3CC     | chr8       | 22,435,969  | 22,546,144  | 8        | -48.1            | 3           | 0.0        | D        |
| QRICH1     | chr3       | 49,024,706  | 49,099,373  | 8        | -55.7            | 7           | 1.0        | D        |
| TAP2       | chr6       | 32,816,832  | 32,843,823  | 8        | -54.6            | 4           | 7.0        | D        |
| VAR5       | chr6       | 31,772,519  | 31,800,935  | 8        | -47.3            | 5           | 46.0       | D        |
| WDR90      | chr16      | 644,362     | 672,829     | 8        | -61.5            | 3           | 0.0        | D        |
| ASCC1      | chr10      | 72,091,031  | 72,222,134  | 7        | -48.2            | 2           | 0.0        | D        |
| PRRC2A     | chr6       | 31,615,672  | 31,642,777  | 7        | -48.3            | 13          | 14.0       | D        |
| RAB40C     | chr16      | 584,356     | 634,273     | 7        | -52.6            | 3           | 0.0        | D        |
| RBM14-RBM4 | chr11      | 66,611,581  | 66,651,473  | 7        | -51.4            | 6           | 11.0       | D        |
| SEPT2      | chr2       | 241,310,186 | 241,359,026 | 7        | -50.2            | 8           | 0.0        | D        |
| STK11      | chr19      | 1,200,798   | 1,233,435   | 7        | -60.5            | 6           | 0.0        | D        |
| ADCK5      | chr8       | 144,369,014 | 144,398,238 | 6        | -48.7            | 2           | 0.0        | D        |
| BLM        | chr15      | 90,712,326  | 90,820,462  | 6        | -41.3            | 11          | 14.0       | D        |
| CPSF1      | chr8       | 144,388,230 | 144,414,349 | 6        | -42.2            | 4           | 0.0        | D        |
| DIDO1      | chr20      | 62,872,737  | 62,942,952  | 6        | -55.8            | 2           | 0.0        | D        |
| GRAP2      | chr22      | 39,896,081  | 39,978,342  | 6        | -57.9            | 4           | 4.0        | D        |
| MCM3AP     | chr21      | 46,230,124  | 46,290,394  | 6        | -51.2            | 8           | 22.0       | D        |
| PCED1B     | chr12      | 47,074,602  | 47,241,663  | 6        | -54.7            | 1           | 0.0        | D        |
| PRKAR2A    | chr3       | 48,741,578  | 48,852,850  | 6        | -58.4            | 2           | 7.0        | D        |
| RNPS1      | chr16      | 2,248,115   | 2,273,412   | 6        | -78.4            | 2           | 0.0        | D        |

Table 9: Table of all genes identified within analysis. *(continued)*

| Gene     | Chromosome | Start Pos. | End Pos.   | Patients | Freq. Change (%) | Peak Abund. | Long. Obs. | Criteria |
|----------|------------|------------|------------|----------|------------------|-------------|------------|----------|
| WASF2    | chr1       | 27,399,225 | 27,495,187 | 6        | -48.2            | 3           | 0.0        | D        |
| WNK1     | chr12      | 747,922    | 916,452    | 6        | -60.3            | 4           | 1.0        | D        |
| ZBTB4    | chr17      | 7,454,365  | 7,489,249  | 6        | -62.2            | 3           | 0.0        | D        |
| EXOC2    | chr6       | 480,137    | 698,141    | 5        | -71.9            | 4           | 0.0        | D        |
| HAGH     | chr16      | 1,804,102  | 1,832,194  | 5        | -58.0            | 6           | 14.0       | D        |
| MIR1268A | chr19      | 2,997,812  | 3,069,714  | 5        | 8.2              | 3           | 0.0        | D        |
| TC2N     | chr14      | 91,774,751 | 91,872,536 | 5        | -49.9            | 4           | 0.0        | D        |
| ZNF598   | chr16      | 1,992,651  | 2,014,821  | 5        | -63.6            | 3           | 0.0        | D        |
| FAM222B  | chr17      | 28,750,977 | 28,847,839 | 4        | -52.5            | 5           | 0.0        | D        |
| PCBP3    | chr21      | 45,638,724 | 45,947,454 | 4        | -54.8            | 2           | 0.0        | D        |
| MIR1268A | chr15      | 28,320,482 | 28,505,841 | 2        | Inf              | 1           | 0.0        | D        |



Supplementary Report 2:  
Genes of interest marked by vector integration  
CLL Patients only (CR/PRtd & PR/NR Response Groups)

**Contents**

|                                                  |               |
|--------------------------------------------------|---------------|
| <b>Summary</b>                                   | <b>2</b>      |
| Integration Frequency (Enrichment) . . . . .     | 7             |
| Integration Frequency (Depletion) . . . . .      | 8             |
| Genes with the Most Abundant Clones . . . . .    | 9             |
| Longitudinal Observation . . . . .               | 10            |
| <br><b>Reference Data</b>                        | <br><b>11</b> |
| <br><b>Comprehensive Genes of Interest Table</b> | <br><b>12</b> |

---

## Summary

Lentiviral vectors integrate into genomes of targeted host cells (Tcells). These genomic locations of vector integrations are identifiable through integration site sequencing. Abundances of individual cell clones can be inferred by the sonicLength method (**Berry *et al.* 2012**).

In this report, we mined the data collected from integration site sequencing for 29 CART treated subjects. We constructed 4 gene lists based on: 1 & 2) increased / decreased integration site occurrence in patient samples relative to the initial transduction product, 3) peak clonal abundance, and 4) longitudinal clonal persistence. More about each of these criteria is below:

- **Integration Frequency** is the rate at which integration sites are observed within a gene. This is compared between patient samples and the initial transduction product to score enrichment or depletion during growth in patients. The top of genes with higher patient sample integration frequency over transduction samples were chosen for study (p-value  $\leq 0.05$  after exclusion of genes with clones from less than 2 patients and less than 10 observed clones).
- **Clonal Abundance** can be determined during analysis by quantifying the number of sites of linker ligation associated with each unique integration site. This method is further described in **Berry *et al.* 2012**. This allows clonal expansion to be quantified. The top 1% of the genes were selected for study based on their maximal peak clonal abundance.
- **Longitudinal Observation** of clones is the quantification of observed timespans and last observed timepoints. The maximum value for clones within a gene were considered for characterization of the gene in this analysis. Genes were only considered if there were 10 or more integration sites isolated from at least two different patient samples. Genes were also not considered if they only consisted of clones which were observed once or the last observed timepoint was less than 90 days from initial infusion.

A point to keep in mind through all this analysis is that integration sites are sampled from a larger population. It would be rare for all integration sites in a sample to be represented in the sequence data.

Table 1: Summary of each filtering criteria.

| Criteria     | Gene  | Onco        | Tumor           | Lymphoma    | COSMIC      | TCGA        | Clonal Hema. |
|--------------|-------|-------------|-----------------|-------------|-------------|-------------|--------------|
|              | Count | Related (%) | Suppressors (%) | Related (%) | Related (%) | Related (%) | Related (%)  |
| Enrichment   | 64    | */ 25.00    | */ 12.50        | / 0.000     | / 7.81      | */ 9.38     | / 1.562      |
| Depletion    | 38    | / 7.89      | / 10.53         | / 0.000     | / 2.63      | / 7.89      | / 0.000      |
| Abundance    | 120   | */ 20.83    | / 5.83          | / 0.000     | */ 9.17     | / 5.00      | / 0.833      |
| Longitudinal | 208   | */ 25.48    | */ 12.02        | / 0.481     | */ 12.50    | */ 12.02    | */ 1.442     |
| Composite    | 343   | */ 22.16    | */ 8.75         | / 0.292     | */ 10.50    | */ 9.33     | */ 0.875     |

**Table 1** summarizes the size and contents of each criteria gene list identified by the various methods. Significance of overlap between lists are displayed by asterisks before the percent of genes identified from the criteria list which overlap with the column specified group. The asterisk to the left of the “/” indicates a p-value below 0.05 *before* multiple comparison corrections, while an asterisk to the right of the “/” indicates a p-value below 0.05 *after* multiple comparison corrections. Significance was tested using Fishers Exact test and multiple comparison corrections were made using a Benjamini-Hochberg (FDR) method for each criteria based list.

Percent of all analyzed transcription units associated with each list as as follows:

- Onco Related: 9.41%
- Tumor Suppressors: 4.91%
- Lymphoma Related: 0.16%
- COSMIC Related: 3.78%
- TCGA Related: 2.88%
- Clonal Hematopoiesis Related: 0.18%

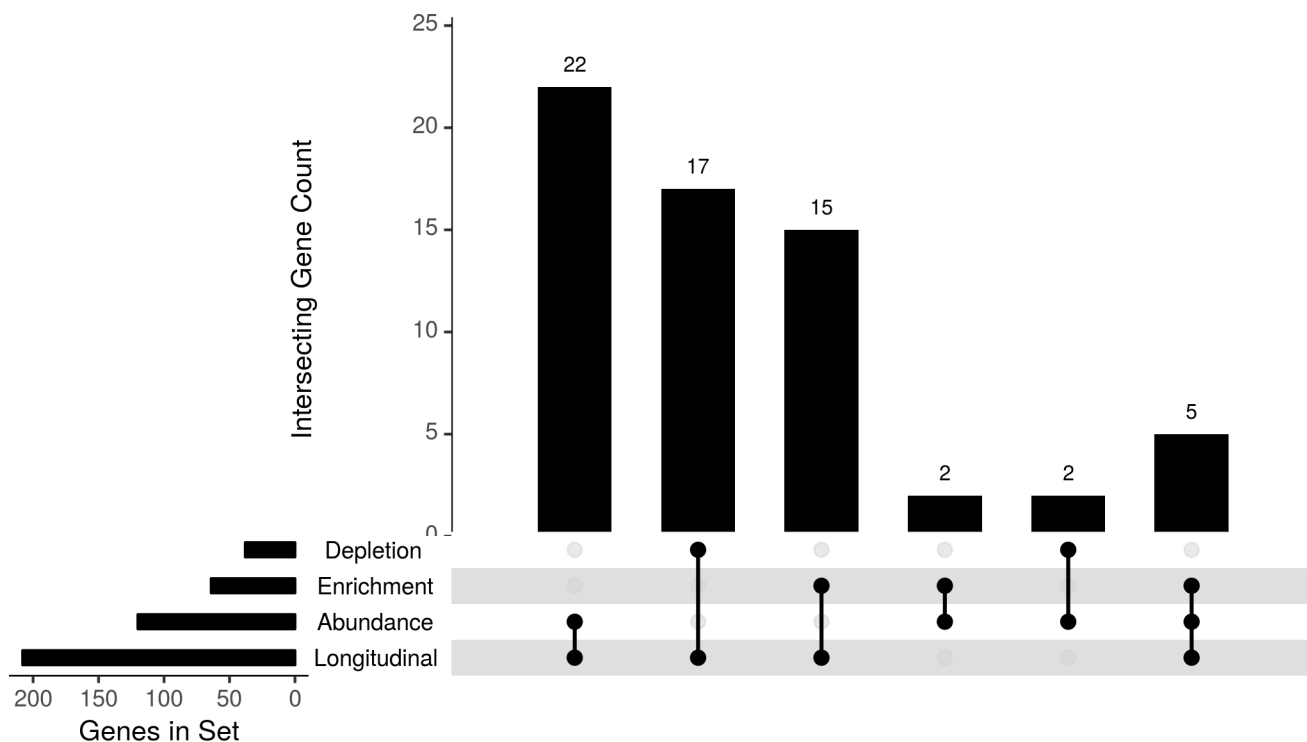

Figure 1: Intersecting gene lists identified through the various selection criteria.

Table 2: The most consistently observed genes from filtering by various criteria. The 'Criteria.' column is a count of how many times the gene was identified by these methods, while the 'Patients' column notes how many specimens collected from patients have had integration sites within the noted gene.

| Gene   | Patients | Freq. Change (%) | Peak Abund. | Long. Obs. | Criteria |
|--------|----------|------------------|-------------|------------|----------|
| AKAP13 | 11       | 191.5            | 27          | 360        | EAL      |
| UBAP2L | 10       | 122.1            | 30          | 180        | EAL      |
| CLK4   | 7        | 137.5            | 53          | 120        | EAL      |
| PTBP1  | 7        | 175.3            | 47          | 360        | EAL      |
| TET2   | 5        | 264.4            | 814         | 1584       | EAL      |

Table 3: GO Biological Process. Top 11 per group. Total genes considered: 314

| Group | GO ID      | GO Term                                              | Term Size | Gene Count | Ad-justed P-value |
|-------|------------|------------------------------------------------------|-----------|------------|-------------------|
| 1     | GO:0016569 | covalent chromatin modification                      | 436       | 41         | 0.0000000         |
|       | GO:0016570 | histone modification                                 | 353       | 36         | 0.0000000         |
|       | GO:0018205 | peptidyl-lysine modification                         | 295       | 30         | 0.0000000         |
|       | GO:0071396 | cellular response to lipid                           | 338       | 22         | 0.0049811         |
|       | GO:0006397 | mRNA processing                                      | 394       | 21         | 0.0406881         |
|       | GO:0048545 | response to steroid hormone                          | 248       | 16         | 0.0206796         |
|       | GO:0043414 | macromolecule methylation                            | 219       | 15         | 0.0196128         |
|       | GO:0061458 | reproductive system development                      | 236       | 15         | 0.0272872         |
|       | GO:0033044 | regulation of chromosome organization                | 243       | 15         | 0.0345353         |
|       | GO:0030522 | intracellular receptor signaling pathway             | 220       | 14         | 0.0342112         |
|       | GO:0048608 | reproductive structure development                   | 234       | 14         | 0.0460150         |
| 2     | GO:0010256 | endomembrane system organization                     | 460       | 33         | 0.0000274         |
|       | GO:0051640 | organelle localization                               | 378       | 23         | 0.0092226         |
|       | GO:0030031 | cell projection assembly                             | 442       | 23         | 0.0379157         |
|       | GO:0044770 | cell cycle phase transition                          | 449       | 23         | 0.0407726         |
|       | GO:0051656 | establishment of organelle localization              | 322       | 22         | 0.0028015         |
|       | GO:0044772 | mitotic cell cycle phase transition                  | 425       | 22         | 0.0407726         |
|       | GO:0000226 | microtubule cytoskeleton organization                | 377       | 20         | 0.0427348         |
|       | GO:0051493 | regulation of cytoskeleton organization              | 323       | 19         | 0.0224037         |
|       | GO:0000280 | nuclear division                                     | 336       | 19         | 0.0330693         |
|       | GO:0048193 | Golgi vesicle transport                              | 273       | 18         | 0.0128083         |
|       | GO:0044782 | cilium organization                                  | 307       | 18         | 0.0285928         |
| 3     | GO:0051223 | regulation of protein transport                      | 495       | 33         | 0.0001378         |
|       | GO:1903827 | regulation of cellular protein localization          | 427       | 26         | 0.0046629         |
|       | GO:0032386 | regulation of intracellular transport                | 351       | 25         | 0.0006210         |
|       | GO:0080135 | regulation of cellular response to stress            | 458       | 25         | 0.0206796         |
|       | GO:1902582 | single-organism intracellular transport              | 484       | 24         | 0.0461773         |
|       | GO:0006913 | nucleocytoplasmic transport                          | 342       | 23         | 0.0026024         |
|       | GO:0051169 | nuclear transport                                    | 347       | 23         | 0.0031293         |
|       | GO:0006281 | DNA repair                                           | 432       | 23         | 0.0304191         |
|       | GO:0033157 | regulation of intracellular protein transport        | 259       | 20         | 0.0011311         |
|       | GO:0034504 | protein localization to nucleus                      | 257       | 17         | 0.0160576         |
|       | GO:0040029 | regulation of gene expression, epigenetic            | 218       | 16         | 0.0077303         |
| 4     | GO:0032101 | regulation of response to external stimulus          | 426       | 28         | 0.0008850         |
|       | GO:0030155 | regulation of cell adhesion                          | 424       | 27         | 0.0019013         |
|       | GO:0001816 | cytokine production                                  | 419       | 24         | 0.0156509         |
|       | GO:0031347 | regulation of defense response                       | 453       | 24         | 0.0272872         |
|       | GO:0046649 | lymphocyte activation                                | 432       | 22         | 0.0463553         |
|       | GO:0042110 | T cell activation                                    | 314       | 19         | 0.0206796         |
|       | GO:0044089 | positive regulation of cellular component biogenesis | 349       | 19         | 0.0407726         |
|       | GO:0061061 | muscle structure development                         | 348       | 19         | 0.0407726         |
|       | GO:0002764 | immune response-regulating signaling pathway         | 354       | 19         | 0.0445747         |
|       | GO:0030099 | myeloid cell differentiation                         | 233       | 18         | 0.0023140         |
|       | GO:0009314 | response to radiation                                | 321       | 18         | 0.0407726         |

Table 4: KEGG Pathway analysis. Top 10 per group. Total genes considered: 152

| Group | KEGG ID       | Description                                     | Term Size | Gene Count | Adjusted P-value |
|-------|---------------|-------------------------------------------------|-----------|------------|------------------|
| 1     | path:hsa04144 | Endocytosis                                     | 200       | 10         | 0.1487712        |
|       | path:hsa04070 | Phosphatidylinositol signaling system           | 85        | 7          | 0.0530465        |
|       | path:hsa04810 | Regulation of actin cytoskeleton                | 148       | 7          | 0.2174690        |
|       | path:hsa00562 | Inositol phosphate metabolism                   | 63        | 6          | 0.0505688        |
| 2     | path:hsa05200 | Pathways in cancer                              | 338       | 15         | 0.1677885        |
|       | path:hsa04919 | Thyroid hormone signaling pathway               | 89        | 11         | 0.0011710        |
|       | path:hsa04140 | Autophagy - animal                              | 109       | 10         | 0.0229892        |
|       | path:hsa05225 | Hepatocellular carcinoma                        | 100       | 9          | 0.0384941        |
|       | path:hsa04714 | Thermogenesis                                   | 153       | 9          | 0.1048879        |
|       | path:hsa05206 | MicroRNAs in cancer                             | 168       | 9          | 0.1317062        |
|       | path:hsa05165 | Human papillomavirus infection                  | 223       | 9          | 0.2976213        |
|       | path:hsa04915 | Estrogen signaling pathway                      | 78        | 7          | 0.0483593        |
|       | path:hsa04072 | Phospholipase D signaling pathway               | 107       | 7          | 0.1048879        |
|       | path:hsa04151 | PI3K-Akt signaling pathway                      | 225       | 6          | 0.6006387        |
| 3     | path:hsa04010 | MAPK signaling pathway                          | 196       | 12         | 0.0689070        |
|       | path:hsa05163 | Human cytomegalovirus infection                 | 154       | 9          | 0.1048879        |
|       | path:hsa00310 | Lysine degradation                              | 46        | 8          | 0.0011710        |
|       | path:hsa04141 | Protein processing in endoplasmic reticulum     | 130       | 8          | 0.1048879        |
|       | path:hsa05167 | Kaposi sarcoma-associated herpesvirus infection | 118       | 7          | 0.1280169        |
|       | path:hsa04659 | Th17 cell differentiation                       | 78        | 6          | 0.0841115        |
|       | path:hsa04660 | T cell receptor signaling pathway               | 80        | 6          | 0.0878337        |
|       | path:hsa04380 | Osteoclast differentiation                      | 85        | 6          | 0.1030673        |
|       | path:hsa04650 | Natural killer cell mediated cytotoxicity       | 85        | 6          | 0.1030673        |
|       | path:hsa05202 | Transcriptional misregulation in cancer         | 104       | 6          | 0.1486516        |
| 4     | path:hsa05205 | Proteoglycans in cancer                         | 128       | 10         | 0.0483593        |
|       | path:hsa05161 | Hepatitis B                                     | 118       | 7          | 0.1280169        |
|       | path:hsa04912 | GnRH signaling pathway                          | 63        | 6          | 0.0505688        |
|       | path:hsa04926 | Relaxin signaling pathway                       | 89        | 6          | 0.1048879        |
|       | path:hsa04722 | Neurotrophin signaling pathway                  | 87        | 6          | 0.1048879        |
|       | path:hsa04068 | FoxO signaling pathway                          | 90        | 6          | 0.1088547        |
|       | path:hsa04015 | Rap1 signaling pathway                          | 137       | 6          | 0.2860101        |
|       | path:hsa04014 | Ras signaling pathway                           | 149       | 6          | 0.3294764        |
|       | path:hsa04664 | Fc epsilon RI signaling pathway                 | 48        | 5          | 0.0505688        |
|       | path:hsa04540 | Gap junction                                    | 62        | 5          | 0.0902081        |
| 5     | path:hsa04024 | cAMP signaling pathway                          | 130       | 10         | 0.0483593        |
|       | path:hsa05203 | Viral carcinogenesis                            | 147       | 9          | 0.1030673        |
|       | path:hsa05166 | Human T-cell leukemia virus 1 infection         | 165       | 9          | 0.1280169        |
|       | path:hsa04720 | Long-term potentiation                          | 49        | 8          | 0.0011710        |
|       | path:hsa04114 | Oocyte meiosis                                  | 95        | 8          | 0.0483593        |
|       | path:hsa04066 | HIF-1 signaling pathway                         | 77        | 7          | 0.0483593        |
|       | path:hsa04310 | Wnt signaling pathway                           | 96        | 7          | 0.0841115        |
|       | path:hsa05164 | Influenza A                                     | 110       | 7          | 0.1048879        |
|       | path:hsa05152 | Tuberculosis                                    | 109       | 7          | 0.1048879        |
|       | path:hsa04120 | Ubiquitin mediated proteolysis                  | 122       | 7          | 0.1317062        |

## Integration Frequency (Enrichment)

Table 5: Table of top 50 genes with the most frequent clonal enrichment.

| Gene      | Num. Patients | TDN Sites | Patient Sites | Onco-Related | Frequency Increase (%) |
|-----------|---------------|-----------|---------------|--------------|------------------------|
| RBM27     | 6             | 0         | 12            | FALSE        | Inf                    |
| AGL       | 4             | 1         | 10            | FALSE        | 871.8                  |
| MCPH1     | 8             | 2         | 13            | TRUE         | 531.7                  |
| BACH2     | 7             | 2         | 12            | TRUE         | 483.1                  |
| NDFIP2    | 6             | 3         | 17            | FALSE        | 450.7                  |
| GAK       | 8             | 3         | 17            | TRUE         | 450.7                  |
| GNA12     | 6             | 2         | 11            | TRUE         | 434.5                  |
| FANCL     | 5             | 2         | 11            | FALSE        | 434.5                  |
| IKZF2     | 6             | 2         | 11            | TRUE         | 434.5                  |
| PIKFYVE   | 9             | 2         | 11            | FALSE        | 434.5                  |
| PAPOLA    | 6             | 3         | 16            | FALSE        | 418.3                  |
| FAM117B   | 6             | 5         | 25            | FALSE        | 385.9                  |
| CD55      | 9             | 3         | 14            | TRUE         | 353.5                  |
| EP400P1   | 6             | 4         | 18            | FALSE        | 337.3                  |
| FUNDC2    | 6             | 3         | 13            | FALSE        | 321.1                  |
| NDUFV2    | 9             | 3         | 13            | FALSE        | 321.1                  |
| GPHN      | 8             | 3         | 13            | TRUE         | 321.1                  |
| RAB11FIP2 | 9             | 3         | 12            | FALSE        | 288.7                  |
| PDS5B     | 8             | 4         | 16            | TRUE         | 288.7                  |
| TAF2      | 7             | 4         | 16            | FALSE        | 288.7                  |
| UHRF1BP1  | 8             | 3         | 12            | FALSE        | 288.7                  |
| RBM39     | 10            | 5         | 19            | TRUE         | 269.3                  |
| TET2      | 5             | 4         | 15            | TRUE         | 264.4                  |
| LRPPRC    | 10            | 4         | 15            | FALSE        | 264.4                  |
| HSF2      | 8             | 4         | 14            | FALSE        | 240.1                  |
| MACROD2   | 7             | 4         | 14            | FALSE        | 240.1                  |
| SLK       | 9             | 4         | 14            | FALSE        | 240.1                  |
| PELP1     | 11            | 8         | 26            | FALSE        | 215.8                  |
| ZFAND3    | 9             | 4         | 13            | FALSE        | 215.8                  |
| KDM4A     | 8             | 5         | 16            | FALSE        | 211.0                  |
| HELLS     | 9             | 5         | 16            | FALSE        | 211.0                  |
| RNF10     | 8             | 5         | 16            | FALSE        | 211.0                  |
| RASA1     | 7             | 7         | 22            | TRUE         | 205.4                  |
| TANC2     | 8             | 6         | 18            | FALSE        | 191.5                  |
| YWHAE     | 8             | 7         | 21            | TRUE         | 191.5                  |
| ATG5      | 8             | 6         | 18            | FALSE        | 191.5                  |
| AKAP13    | 11            | 11        | 33            | TRUE         | 191.5                  |
| TNKS      | 5             | 5         | 15            | FALSE        | 191.5                  |
| SACM1L    | 8             | 6         | 18            | FALSE        | 191.5                  |
| ASCC3     | 7             | 11        | 32            | FALSE        | 182.7                  |
| SEPT7     | 7             | 6         | 17            | FALSE        | 175.3                  |
| PTBP1     | 7             | 6         | 17            | TRUE         | 175.3                  |
| PUM1      | 9             | 7         | 19            | FALSE        | 163.8                  |
| CLEC16A   | 10            | 12        | 32            | FALSE        | 159.1                  |
| FOCAD     | 8             | 8         | 21            | FALSE        | 155.1                  |
| PIAS1     | 8             | 8         | 21            | FALSE        | 155.1                  |
| CHD1      | 6             | 7         | 18            | FALSE        | 149.9                  |
| JMJD1C    | 12            | 11        | 28            | FALSE        | 147.4                  |
| GBE1      | 10            | 8         | 20            | FALSE        | 142.9                  |
| ABCD2     | 8             | 10        | 25            | FALSE        | 142.9                  |

## Integration Frequency (Depletion)

Table 6: Table of top 38 genes with the most frequent clonal depletion.

| Gene      | Num. Patients | TDN Sites | Patient Sites | Onco-Related | Frequency Increase (%) |
|-----------|---------------|-----------|---------------|--------------|------------------------|
| RNPS1     | 5             | 69        | 16            | FALSE        | -77.5                  |
| EXOC2     | 5             | 34        | 10            | FALSE        | -71.4                  |
| EIF2B3    | 8             | 42        | 14            | FALSE        | -67.6                  |
| NARFL     | 7             | 25        | 10            | FALSE        | -61.1                  |
| USP34     | 5             | 25        | 10            | FALSE        | -61.1                  |
| TRAF2     | 8             | 53        | 22            | FALSE        | -59.7                  |
| QRICH1    | 6             | 45        | 19            | FALSE        | -59.0                  |
| UBE2J2    | 7             | 33        | 14            | FALSE        | -58.8                  |
| HAGH      | 5             | 28        | 12            | FALSE        | -58.4                  |
| IP6K1     | 9             | 60        | 26            | FALSE        | -57.9                  |
| BCAS3     | 6             | 23        | 10            | TRUE         | -57.7                  |
| NOSIP     | 9             | 64        | 28            | FALSE        | -57.5                  |
| SFI1      | 5             | 22        | 10            | FALSE        | -55.8                  |
| ZNF598    | 4             | 22        | 10            | FALSE        | -55.8                  |
| NPEPPS    | 9             | 26        | 12            | FALSE        | -55.1                  |
| WDR90     | 8             | 23        | 11            | FALSE        | -53.5                  |
| PPP3CC    | 7             | 27        | 13            | FALSE        | -53.2                  |
| LSM2      | 7             | 27        | 13            | FALSE        | -53.2                  |
| WNK1      | 5             | 28        | 14            | FALSE        | -51.4                  |
| IFT140    | 6             | 32        | 16            | FALSE        | -51.4                  |
| TSC2      | 8             | 42        | 21            | TRUE         | -51.4                  |
| MROH1     | 8             | 142       | 71            | FALSE        | -51.4                  |
| PLEC      | 8             | 37        | 19            | FALSE        | -50.1                  |
| HCG20     | 7             | 38        | 20            | FALSE        | -48.9                  |
| MIR5096   | 8             | 35        | 19            | FALSE        | -47.2                  |
| NFKBIL1   | 6             | 31        | 17            | FALSE        | -46.7                  |
| ANKFY1    | 8             | 36        | 20            | FALSE        | -46.0                  |
| RAB11FIP3 | 10            | 54        | 30            | FALSE        | -46.0                  |
| ZGPAT     | 10            | 41        | 23            | FALSE        | -45.5                  |
| FKBP5     | 11            | 53        | 30            | FALSE        | -45.0                  |
| SIRT3     | 10            | 37        | 21            | FALSE        | -44.8                  |
| HSF1      | 12            | 76        | 45            | FALSE        | -42.5                  |
| MAPK8IP3  | 10            | 52        | 31            | FALSE        | -42.1                  |
| CCDC57    | 11            | 53        | 33            | FALSE        | -39.5                  |
| ASH1L     | 12            | 66        | 46            | FALSE        | -32.3                  |
| PACS1     | 12            | 150       | 105           | FALSE        | -32.0                  |
| DNMT1     | 11            | 91        | 65            | TRUE         | -30.6                  |
| NPLOC4    | 14            | 217       | 155           | FALSE        | -30.6                  |



## Genes with the Most Abundant Clones

Table 7: Table of top 50 Genes containing the highest abundant clones.

| Gene            | Num. Patients | Peak Abundance | Peak Rel. Abund. | Clonal Gini Index | Onco-Related |
|-----------------|---------------|----------------|------------------|-------------------|--------------|
| TET2            | 6             | 814            | 0.989            | 0.918             | TRUE         |
| KCTD3           | 3             | 589            | 0.265            | 0.663             | FALSE        |
| PATL1           | 4             | 578            | 0.260            | 0.793             | FALSE        |
| PIKFYVE         | 9             | 410            | 0.273            | 0.885             | FALSE        |
| SRCAP           | 10            | 373            | 0.357            | 0.896             | FALSE        |
| MTMR3           | 4             | 261            | 0.041            | 0.859             | TRUE         |
| PCNX1           | 10            | 153            | 0.010            | 0.825             | FALSE        |
| PPP6R3          | 12            | 149            | 0.040            | 0.733             | FALSE        |
| SSH2            | 8             | 137            | 0.062            | 0.805             | FALSE        |
| RSRC1           | 8             | 109            | 0.014            | 0.812             | FALSE        |
| SNHG12          | 2             | 96             | 0.057            | 0.646             | FALSE        |
| MAPK14          | 7             | 91             | 0.006            | 0.784             | TRUE         |
| RPA3            | 4             | 87             | 0.020            | 0.752             | FALSE        |
| ZNF573          | 3             | 86             | 0.610            | 0.677             | FALSE        |
| MGA             | 11            | 85             | 0.013            | 0.754             | FALSE        |
| AQR             | 4             | 84             | 0.022            | 0.790             | FALSE        |
| LEF1            | 7             | 84             | 0.038            | 0.771             | TRUE         |
| LINC01473       | 3             | 82             | 0.075            | 0.643             | FALSE        |
| CARD8           | 11            | 79             | 0.056            | 0.702             | TRUE         |
| IQCB1           | 5             | 79             | 0.028            | 0.752             | FALSE        |
| DNAJC13         | 8             | 71             | 0.004            | 0.765             | FALSE        |
| EXOSC10         | 4             | 70             | 0.008            | 0.776             | FALSE        |
| ATP2A2          | 8             | 67             | 0.030            | 0.749             | FALSE        |
| SEC31A          | 5             | 66             | 0.004            | 0.736             | FALSE        |
| GPN1            | 2             | 62             | 0.017            | 0.711             | FALSE        |
| SMAP2           | 5             | 61             | 0.004            | 0.758             | FALSE        |
| TRIO            | 6             | 61             | 0.025            | 0.769             | TRUE         |
| ZZEF1           | 11            | 56             | 0.333            | 0.626             | FALSE        |
| CLK4            | 7             | 53             | 0.036            | 0.659             | FALSE        |
| IFNGR2          | 2             | 53             | 0.722            | 0.635             | TRUE         |
| JMJD6           | 2             | 53             | 0.015            | 0.755             | FALSE        |
| KDM5D           | 7             | 51             | 0.017            | 0.747             | FALSE        |
| UBR1            | 7             | 48             | 0.421            | 0.722             | FALSE        |
| MEMO1           | 5             | 47             | 0.006            | 0.733             | FALSE        |
| PTBP1           | 7             | 47             | 0.043            | 0.672             | TRUE         |
| DYNC1H1         | 8             | 44             | 0.003            | 0.709             | FALSE        |
| NGDN            | 3             | 44             | 0.005            | 0.623             | FALSE        |
| EIF2AK4         | 3             | 43             | 0.003            | 0.659             | FALSE        |
| MSH5-SAPCD1     | 4             | 43             | 0.039            | 0.708             | FALSE        |
| POLG2           | 1             | 43             | 0.003            | 0.609             | FALSE        |
| RASEF           | 2             | 43             | 0.005            | 0.622             | FALSE        |
| UXT-AS1         | 2             | 43             | 0.039            | 0.477             | FALSE        |
| ADD1            | 8             | 42             | 0.011            | 0.608             | FALSE        |
| GRB2            | 9             | 42             | 0.017            | 0.592             | TRUE         |
| KIFC1           | 6             | 42             | 0.003            | 0.697             | FALSE        |
| TAC3            | 2             | 42             | 0.018            | 0.477             | FALSE        |
| ZNF92           | 3             | 42             | 0.031            | 0.707             | FALSE        |
| ACTL6A          | 1             | 40             | 0.003            | 0.000             | FALSE        |
| ATP6V1G2-DDX39B | 11            | 40             | 0.005            | 0.621             | FALSE        |
| PHF12           | 2             | 40             | 0.014            | 0.670             | FALSE        |

## Longitudinal Observation

Table 8: Table of top 50 genes identified by longitudinal observations.

| Gene     | Time Span | Longest Time | Obs. Count | Num. Patients | Patient Sites | Peak Abund. | Onco-Related |
|----------|-----------|--------------|------------|---------------|---------------|-------------|--------------|
| FKBP5    | 1555.0    | 1825.0       | 4          | 11            | 30            | 15          | FALSE        |
| PTPRA    | 1555.0    | 1825.0       | 3          | 8             | 33            | 4           | FALSE        |
| TET2     | 1464.0    | 1584.0       | 7          | 5             | 15            | 814         | TRUE         |
| UBR1     | 1277.5    | 1825.0       | 4          | 7             | 13            | 48          | FALSE        |
| COX6B1   | 825.0     | 1095.0       | 3          | 9             | 17            | 5           | FALSE        |
| CCDC57   | 642.5     | 912.5        | 2          | 11            | 33            | 6           | FALSE        |
| KMT5B    | 642.5     | 912.5        | 2          | 10            | 26            | 7           | FALSE        |
| MACF1    | 519.5     | 547.5        | 3          | 12            | 32            | 11          | TRUE         |
| DNMT1    | 365.0     | 912.5        | 2          | 11            | 65            | 13          | TRUE         |
| STXBP5   | 350.0     | 360.0        | 4          | 8             | 15            | 8           | FALSE        |
| CASK     | 346.0     | 547.5        | 2          | 7             | 16            | 5           | FALSE        |
| RPTOR    | 346.0     | 360.0        | 2          | 15            | 85            | 11          | FALSE        |
| DIP2A    | 346.0     | 360.0        | 2          | 10            | 35            | 25          | FALSE        |
| PTBP1    | 346.0     | 360.0        | 2          | 7             | 17            | 47          | TRUE         |
| MIR4745  | 346.0     | 360.0        | 2          | 6             | 10            | 47          | FALSE        |
| ZZEF1    | 332.0     | 360.0        | 5          | 11            | 47            | 56          | FALSE        |
| SRCAP    | 332.0     | 360.0        | 5          | 10            | 21            | 373         | FALSE        |
| OGDH     | 332.0     | 360.0        | 4          | 4             | 10            | 17          | FALSE        |
| WDR82    | 277.5     | 547.5        | 3          | 7             | 20            | 7           | TRUE         |
| PIP5K1A  | 277.5     | 547.5        | 2          | 7             | 11            | 3           | FALSE        |
| EP400P1  | 260.0     | 270.0        | 3          | 6             | 18            | 5           | FALSE        |
| HSF1     | 256.0     | 270.0        | 3          | 12            | 45            | 10          | FALSE        |
| BOP1     | 256.0     | 270.0        | 3          | 11            | 34            | 10          | TRUE         |
| FNBP1    | 256.0     | 270.0        | 2          | 9             | 32            | 5           | TRUE         |
| PDS5B    | 256.0     | 270.0        | 2          | 8             | 16            | 10          | TRUE         |
| ACOX1    | 256.0     | 270.0        | 2          | 7             | 15            | 2           | FALSE        |
| PIK3C3   | 180.0     | 360.0        | 3          | 10            | 30            | 5           | FALSE        |
| IQGAP1   | 166.0     | 180.0        | 3          | 9             | 16            | 5           | FALSE        |
| SNAPC4   | 166.0     | 180.0        | 2          | 7             | 18            | 7           | FALSE        |
| UBE2J2   | 166.0     | 180.0        | 2          | 7             | 14            | 2           | FALSE        |
| SSH2     | 152.0     | 1095.0       | 4          | 8             | 26            | 137         | FALSE        |
| MED13    | 152.0     | 270.0        | 4          | 12            | 26            | 21          | FALSE        |
| CARD8    | 152.0     | 180.0        | 4          | 11            | 38            | 79          | TRUE         |
| LEF1     | 152.0     | 180.0        | 4          | 7             | 15            | 84          | TRUE         |
| VAV1     | 152.0     | 180.0        | 3          | 13            | 76            | 37          | TRUE         |
| STAG1    | 136.0     | 912.5        | 2          | 8             | 13            | 6           | TRUE         |
| PPP6R2   | 136.0     | 180.0        | 2          | 11            | 40            | 15          | FALSE        |
| RTTN     | 136.0     | 150.0        | 2          | 8             | 15            | 6           | FALSE        |
| MAPK8IP3 | 130.0     | 270.0        | 2          | 10            | 31            | 5           | FALSE        |
| SMG1     | 122.0     | 150.0        | 3          | 12            | 39            | 7           | FALSE        |
| INPP4B   | 122.0     | 150.0        | 3          | 11            | 28            | 3           | FALSE        |
| PIAS1    | 122.0     | 150.0        | 3          | 8             | 21            | 6           | FALSE        |
| DDX60    | 122.0     | 150.0        | 3          | 9             | 15            | 22          | FALSE        |
| ZNRD1ASP | 122.0     | 150.0        | 3          | 6             | 14            | 4           | FALSE        |
| DPYD     | 122.0     | 150.0        | 2          | 12            | 33            | 22          | FALSE        |
| RUNX1    | 110.0     | 360.0        | 2          | 9             | 19            | 1           | TRUE         |
| ASH1L    | 106.0     | 1825.0       | 2          | 12            | 46            | 5           | FALSE        |
| WVOX     | 106.0     | 1095.0       | 3          | 5             | 11            | 5           | TRUE         |
| RFX2     | 106.0     | 360.0        | 2          | 7             | 14            | 9           | TRUE         |
| PPFIA1   | 106.0     | 270.0        | 4          | 5             | 11            | 20          | FALSE        |

## Reference Data

The NCBI RefGenes data set was used to identify gene regions (hg38) while genes identified as onco-related were from the Bushman Lab curated list of **onco-related genes**.

Gene Ontologies were extracted from the `GO.db` R-package (v3.4.1). KEGG pathways were acquired via interfacing with the KEGG web-server API through the `KEGGREST` R-package (v1.16.1). Gene lists, including RefSeq genes used for annotation of integration sites, were standardized to HGNC gene symbols (date: 2018-02-07). Groups identified in GO and KEGG analyses were determined from Jaccard distances between identified terms, followed by modularity-optimizing clustering from a weighted-undirected graph using a Louvain algorithm (**Blondel *et al.* 2008**). Terms within groups of GO or KEGG terms have greater overlap of gene lists between themselves than between terms found in other groups. This method was implemented to help reduce the functional redundancy commonly observed in GO and overlapping pathways observed with KEGG.

# Comprehensive Genes of Interest Table

Table 9: Table of all genes identified within analysis.

| Gene     | Chromosome | Start Pos.  | End Pos.    | Patients | Freq. Change (%) | Peak Abund. | Long. Obs. | Criteria |
|----------|------------|-------------|-------------|----------|------------------|-------------|------------|----------|
| AKAP13   | chr15      | 85,375,615  | 85,754,358  | 11       | 191.5            | 27          | 7.0        | EAL      |
| UBAP2L   | chr1       | 154,215,171 | 154,276,510 | 10       | 122.1            | 30          | 7.0        | EAL      |
| CLK4     | chr5       | 178,597,663 | 178,632,053 | 7        | 137.5            | 53          | 106.0      | EAL      |
| PTBP1    | chr19      | 792,391     | 817,327     | 7        | 175.3            | 47          | 346.0      | EAL      |
| TET2     | chr4       | 105,140,874 | 105,284,803 | 5        | 264.4            | 814         | 1464.0     | EAL      |
| PPP3CA   | chr4       | 101,018,429 | 101,352,471 | 14       | 84.1             | 5           | 46.0       | EL       |
| LUC7L    | chr16      | 183,968     | 234,482     | 13       | -10.1            | 30          | 7.0        | AL       |
| VAV1     | chr19      | 6,767,667   | 6,862,366   | 13       | 39.4             | 37          | 152.0      | AL       |
| JMJD1C   | chr10      | 63,162,220  | 63,527,075  | 12       | 147.4            | 5           | 7.0        | EL       |
| PPP6R3   | chr11      | 68,455,717  | 68,620,333  | 12       | 87.2             | 149         | 14.0       | EA       |
| RNF157   | chr17      | 76,137,452  | 76,245,311  | 12       | 17.6             | 28          | 14.0       | AL       |
| SMG1P1   | chr16      | 22,432,007  | 22,497,220  | 12       | 115.2            | 3           | 100.0      | EL       |
| CARD8    | chr19      | 48,203,085  | 48,260,946  | 11       | 15.4             | 79          | 152.0      | AL       |
| SUPT3H   | chr6       | 44,821,729  | 45,383,051  | 11       | 90.1             | 8           | 14.0       | EL       |
| XPO5     | chr6       | 43,517,329  | 43,581,075  | 11       | 31.9             | 26          | 22.0       | AL       |
| ZZEF1    | chr17      | 3,999,444   | 4,147,959   | 11       | 8.7              | 56          | 332.0      | AL       |
| CRAMP1   | chr16      | 1,609,639   | 1,682,908   | 10       | 1.3              | 30          | 18.0       | AL       |
| DIP2A    | chr21      | 46,453,948  | 46,575,013  | 10       | -15.0            | 25          | 346.0      | AL       |
| EYA3     | chr1       | 27,965,343  | 28,093,637  | 10       | 122.1            | 7           | 32.0       | EL       |
| NF1      | chr17      | 31,089,926  | 31,382,677  | 10       | 94.4             | 14          | 14.0       | EL       |
| PAFAH1B1 | chr17      | 2,588,628   | 2,690,615   | 10       | 39.4             | 30          | 7.0        | AL       |
| PIK3C3   | chr18      | 41,950,197  | 42,086,482  | 10       | 142.9            | 5           | 180.0      | EL       |
| SRCAP    | chr16      | 30,694,140  | 30,745,129  | 10       | 57.0             | 373         | 332.0      | AL       |
| GRB2     | chr17      | 75,313,075  | 75,410,709  | 9        | -22.3            | 42          | 14.0       | AL       |
| HELLS    | chr10      | 94,540,766  | 94,607,099  | 9        | 211.0            | 15          | 106.0      | EL       |
| NDUFV2   | chr18      | 9,097,629   | 9,139,345   | 9        | 321.1            | 15          | 22.0       | EL       |
| PIKFYVE  | chr2       | 208,261,266 | 208,363,751 | 9        | 434.5            | 410         | 14.0       | EA       |
| SMURF2   | chr17      | 64,539,616  | 64,667,268  | 9        | 32.5             | 27          | 7.0        | AL       |
| USP25    | chr21      | 15,725,024  | 15,885,071  | 9        | 110.6            | 10          | 46.0       | EL       |
| MCPH1    | chr8       | 6,401,591   | 6,653,505   | 8        | 531.7            | 9           | 7.0        | EL       |
| PDCD4    | chr10      | 110,866,794 | 110,905,006 | 8        | 36.0             | 26          | 14.0       | AL       |
| PDS5B    | chr13      | 32,581,426  | 32,783,020  | 8        | 288.7            | 10          | 256.0      | EL       |
| PIAS1    | chr15      | 68,049,178  | 68,196,466  | 8        | 155.1            | 6           | 122.0      | EL       |
| RSRC1    | chr3       | 158,105,051 | 158,549,835 | 8        | -2.8             | 109         | 106.0      | AL       |
| SSH2     | chr17      | 29,620,938  | 29,935,228  | 8        | -15.8            | 137         | 152.0      | AL       |
| ST13     | chr22      | 40,819,534  | 40,862,008  | 8        | 67.9             | 29          | 7.0        | AL       |
| LEF1     | chr4       | 108,042,544 | 108,173,956 | 7        | -2.8             | 84          | 152.0      | AL       |
| MAPK14   | chr6       | 36,022,676  | 36,116,236  | 7        | 37.7             | 91          | 7.0        | AL       |
| UBR1     | chr15      | 42,937,899  | 43,111,088  | 7        | -45.1            | 48          | 1277.5     | AL       |
| EP400P1  | chr12      | 132,079,282 | 132,131,340 | 6        | 337.3            | 5           | 260.0      | EL       |
| HERC4    | chr10      | 67,916,898  | 68,080,346  | 6        | -10.9            | 35          | 106.0      | AL       |

Table 9: Table of all genes identified within analysis. (continued)

| Gene     | Chromosome | Start Pos.  | End Pos.    | Patients | Freq. Change (%) | Peak Abund. | Long. Obs. | Criteria |
|----------|------------|-------------|-------------|----------|------------------|-------------|------------|----------|
| MTOR     | chr1       | 11,101,530  | 11,267,551  | 6        | 2.9              | 29          | 90.0       | AL       |
| NDFIP2   | chr13      | 79,476,123  | 79,561,077  | 6        | 450.7            | 8           | 46.0       | EL       |
| PA2G4    | chr12      | 56,099,318  | 56,118,910  | 5        | 52.7             | 38          | 14.0       | AL       |
| FANCA    | chr16      | 89,732,550  | 89,821,657  | 15       | 28.6             | 21          | 15.0       | L        |
| JPT2     | chr16      | 1,673,276   | 1,707,072   | 15       | 36.8             | 23          | 46.0       | L        |
| RPTOR    | chr17      | 80,539,824  | 80,971,373  | 15       | 16.3             | 11          | 346.0      | L        |
| KDM2A    | chr11      | 67,114,268  | 67,263,079  | 14       | -24.2            | 7           | 50.0       | L        |
| NPLOC4   | chr17      | 81,551,884  | 81,642,153  | 14       | -30.6            | 16          | 46.0       | DL       |
| ANKRD11  | chr16      | 89,262,620  | 89,495,561  | 13       | 28.5             | 23          | 7.0        | L        |
| EHMT1    | chr9       | 137,613,991 | 137,841,126 | 13       | 39.7             | 3           | 50.0       | L        |
| EP300    | chr22      | 41,087,609  | 41,185,077  | 13       | 71.5             | 6           | 46.0       | L        |
| NSD1     | chr5       | 177,128,078 | 177,305,213 | 13       | -25.8            | 6           | 62.0       | L        |
| RABEP1   | chr17      | 5,277,262   | 5,391,339   | 13       | 15.6             | 26          | 14.0       | A        |
| UTRN     | chr6       | 144,286,736 | 144,858,034 | 13       | -7.0             | 6           | 22.0       | L        |
| VPS8     | chr3       | 184,807,142 | 185,057,614 | 13       | 118.7            | 10          | 46.0       | E        |
| ASH1L    | chr1       | 155,330,260 | 155,567,533 | 12       | -32.3            | 5           | 106.0      | DL       |
| DPYD     | chr1       | 97,072,743  | 97,926,059  | 12       | -25.4            | 22          | 122.0      | L        |
| HSF1     | chr8       | 144,286,568 | 144,319,726 | 12       | -42.5            | 10          | 256.0      | DL       |
| MACF1    | chr1       | 39,079,166  | 39,492,138  | 12       | -29.3            | 11          | 519.5      | L        |
| MED13    | chr17      | 61,937,604  | 62,070,282  | 12       | 68.4             | 21          | 152.0      | L        |
| PACS1    | chr11      | 66,065,352  | 66,249,747  | 12       | -32.0            | 5           | 46.0       | DL       |
| SMG1     | chr16      | 18,799,852  | 18,931,404  | 12       | -29.8            | 7           | 122.0      | L        |
| BOP1     | chr8       | 144,257,045 | 144,296,438 | 11       | -28.2            | 10          | 256.0      | L        |
| CCDC57   | chr17      | 82,096,469  | 82,217,829  | 11       | -39.5            | 6           | 642.5      | DL       |
| CREBBP   | chr16      | 3,720,054   | 3,885,120   | 11       | 21.5             | 5           | 46.0       | L        |
| DNMT1    | chr19      | 10,128,343  | 10,200,135  | 11       | -30.6            | 13          | 365.0      | DL       |
| FKBP5    | chr6       | 35,568,584  | 35,733,583  | 11       | -45.0            | 15          | 1555.0     | DL       |
| GMDS     | chr6       | 1,618,799   | 2,250,634   | 11       | 118.7            | 8           | 14.0       | L        |
| INPP4B   | chr4       | 142,018,159 | 142,851,535 | 11       | -17.5            | 3           | 122.0      | L        |
| PELP1    | chr17      | 4,666,383   | 4,709,337   | 11       | 215.8            | 3           | 14.0       | E        |
| PPP6R2   | chr22      | 50,338,316  | 50,450,089  | 11       | -28.0            | 15          | 136.0      | L        |
| SEC16A   | chr9       | 136,435,095 | 136,488,759 | 11       | -12.9            | 29          | 46.0       | A        |
| SF1      | chr11      | 64,759,603  | 64,783,844  | 11       | 22.2             | 16          | 14.0       | L        |
| TRAPPC10 | chr21      | 44,007,324  | 44,111,551  | 11       | -0.3             | 7           | 14.0       | L        |
| USP15    | chr12      | 62,255,339  | 62,414,721  | 11       | 45.8             | 14          | 15.0       | L        |
| VPS13D   | chr1       | 12,225,038  | 12,517,046  | 11       | 74.9             | 3           | 0.0        | E        |
| ZNF407   | chr18      | 74,625,962  | 75,070,672  | 11       | 110.6            | 3           | 1.0        | E        |
| ARHGAP15 | chr2       | 143,124,329 | 143,773,352 | 10       | 45.8             | 7           | 5.0        | L        |
| ATF7IP   | chr12      | 14,360,631  | 14,507,935  | 10       | 9.9              | 8           | 7.0        | L        |
| CHD4     | chr12      | 6,565,081   | 6,612,433   | 10       | 53.4             | 19          | 7.0        | L        |
| CLEC16A  | chr16      | 10,939,487  | 11,187,189  | 10       | 159.1            | 9           | 0.0        | E        |

Table 9: Table of all genes identified within analysis. (continued)

| Gene      | Chromosome | Start Pos.  | End Pos.    | Patients | Freq. Change (%) | Peak Abund. | Long. Obs. | Criteria |
|-----------|------------|-------------|-------------|----------|------------------|-------------|------------|----------|
| CYTH1     | chr17      | 78,669,046  | 78,787,342  | 10       | -23.6            | 4           | 7.0        | L        |
| DDX42     | chr17      | 63,769,188  | 63,824,317  | 10       | 42.0             | 6           | 14.0       | L        |
| GBE1      | chr3       | 81,484,698  | 81,766,799  | 10       | 142.9            | 9           | 46.0       | E        |
| GLCC11    | chr7       | 7,963,742   | 8,094,079   | 10       | 8.6              | 4           | 84.0       | L        |
| KDM6A     | chrX       | 44,868,174  | 45,117,612  | 10       | 86.3             | 9           | 106.0      | L        |
| KMT5B     | chr11      | 68,149,862  | 68,218,772  | 10       | -6.4             | 7           | 642.5      | L        |
| LRBA      | chr4       | 150,259,658 | 151,020,497 | 10       | 32.2             | 17          | 106.0      | L        |
| LRPPRC    | chr2       | 43,881,223  | 44,001,005  | 10       | 264.4            | 7           | 0.0        | E        |
| MAPK8IP3  | chr16      | 1,701,182   | 1,775,317   | 10       | -42.1            | 5           | 130.0      | DL       |
| MECP2     | chrX       | 154,016,812 | 154,102,731 | 10       | -9.6             | 12          | 99.0       | L        |
| MGA       | chr15      | 41,655,411  | 41,774,943  | 10       | 64.5             | 85          | 46.0       | A        |
| NCOA1     | chr2       | 24,579,476  | 24,775,701  | 10       | -7.2             | 3           | 22.0       | L        |
| PBRM1     | chr3       | 52,540,351  | 52,690,850  | 10       | -16.2            | 14          | 7.0        | L        |
| PCNX1     | chr14      | 70,902,404  | 71,120,382  | 10       | -23.1            | 153         | 14.0       | A        |
| PRKACB    | chr1       | 84,072,974  | 84,243,498  | 10       | 39.7             | 4           | 7.0        | L        |
| RAB11FIP3 | chr16      | 420,667     | 527,481     | 10       | -46.0            | 7           | 46.0       | DL       |
| RBM39     | chr20      | 35,698,608  | 35,747,336  | 10       | 269.3            | 2           | 14.0       | E        |
| SAFB2     | chr19      | 5,581,998   | 5,627,927   | 10       | -6.9             | 13          | 22.0       | L        |
| SETD2     | chr3       | 47,011,407  | 47,168,977  | 10       | 32.8             | 17          | 22.0       | L        |
| SMARCC1   | chr3       | 47,580,887  | 47,786,915  | 10       | -11.1            | 3           | 7.0        | L        |
| SMG6      | chr17      | 2,054,838   | 2,308,775   | 10       | -16.7            | 16          | 7.0        | L        |
| SRRM2     | chr16      | 2,747,328   | 2,776,412   | 10       | 87.4             | 32          | 1.0        | A        |
| ZGPAT     | chr20      | 63,702,441  | 63,741,142  | 10       | -45.5            | 5           | 7.0        | DL       |
| ZNF251    | chr8       | 144,715,908 | 144,760,585 | 10       | -22.6            | 21          | 22.0       | L        |
| CD55      | chr1       | 207,316,471 | 207,365,966 | 9        | 353.5            | 4           | 0.0        | E        |
| COX6B1    | chr19      | 35,643,222  | 35,663,784  | 9        | 3.3              | 5           | 825.0      | L        |
| CSNK1D    | chr17      | 82,237,660  | 82,278,742  | 9        | -19.0            | 8           | 7.0        | L        |
| DDX60     | chr4       | 168,211,290 | 168,323,807 | 9        | 62.0             | 22          | 122.0      | L        |
| DENND1B   | chr1       | 197,499,748 | 197,780,493 | 9        | -27.1            | 3           | 7.0        | L        |
| DIP2B     | chr12      | 50,499,984  | 50,753,667  | 9        | 2.6              | 4           | 7.0        | L        |
| DLG1      | chr3       | 197,037,559 | 197,304,272 | 9        | 5.0              | 8           | 7.0        | L        |
| FNBP1     | chr9       | 129,882,186 | 130,048,194 | 9        | -18.2            | 5           | 256.0      | L        |
| FOXJ3     | chr1       | 42,171,538  | 42,340,877  | 9        | 27.5             | 12          | 7.0        | L        |
| FRYL      | chr4       | 48,492,362  | 48,785,299  | 9        | 17.6             | 24          | 14.0       | A        |
| GANAB     | chr11      | 62,619,825  | 62,651,726  | 9        | 9.9              | 6           | 7.0        | L        |
| HNRNPUL2  | chr11      | 62,707,624  | 62,732,385  | 9        | -10.0            | 9           | 76.0       | L        |
| IL4I1     | chr19      | 49,884,655  | 49,934,539  | 9        | -36.8            | 5           | 46.0       | L        |
| IQGAP1    | chr15      | 90,383,240  | 90,507,243  | 9        | -29.3            | 5           | 166.0      | L        |
| KIAA1468  | chr18      | 62,182,290  | 62,312,122  | 9        | 23.1             | 17          | 46.0       | L        |
| MED13L    | chr12      | 115,953,575 | 116,282,186 | 9        | 35.0             | 38          | 7.0        | A        |
| NBEAL1    | chr2       | 203,009,878 | 203,222,994 | 9        | 66.6             | 11          | 14.0       | L        |

Table 9: Table of all genes identified within analysis. (continued)

| Gene      | Chromosome | Start Pos.  | End Pos.    | Patients | Freq. Change (%) | Peak Abund. | Long. Obs. | Criteria |
|-----------|------------|-------------|-------------|----------|------------------|-------------|------------|----------|
| NOSIP     | chr19      | 49,550,467  | 49,585,572  | 9        | -57.5            | 29          | 0.0        | DA       |
| NUP214    | chr9       | 131,120,560 | 131,239,670 | 9        | 8.6              | 8           | 106.0      | L        |
| PARP8     | chr5       | 50,660,898  | 50,851,522  | 9        | -21.5            | 4           | 14.0       | L        |
| PLEKHA5   | chr12      | 19,124,691  | 19,381,399  | 9        | 16.6             | 2           | 7.0        | L        |
| POLA2     | chr11      | 65,256,851  | 65,303,685  | 9        | -16.7            | 9           | 7.0        | L        |
| POT1      | chr7       | 124,817,385 | 124,934,983 | 9        | 10.1             | 26          | 0.0        | A        |
| PUM1      | chr1       | 30,926,505  | 31,070,717  | 9        | 163.8            | 5           | 0.0        | E        |
| RAB11FIP2 | chr10      | 117,999,915 | 118,051,884 | 9        | 288.7            | 19          | 1.0        | E        |
| RNF216    | chr7       | 5,615,040   | 5,786,730   | 9        | -41.7            | 15          | 106.0      | L        |
| RUNX1     | chr21      | 34,782,800  | 35,054,298  | 9        | 130.8            | 1           | 110.0      | L        |
| SLC6A16   | chr19      | 49,284,634  | 49,330,217  | 9        | 20.5             | 2           | 14.0       | L        |
| SLK       | chr10      | 103,962,184 | 104,034,233 | 9        | 240.1            | 13          | 1.0        | E        |
| SMCHD1    | chr18      | 2,650,886   | 2,810,017   | 9        | -33.5            | 4           | 7.0        | L        |
| TARSL2    | chr15      | 101,648,751 | 101,729,442 | 9        | 191.5            | 22          | 7.0        | L        |
| TCF20     | chr22      | 42,155,012  | 42,288,927  | 9        | -2.8             | 10          | 7.0        | L        |
| TRAPPC8   | chr18      | 31,824,172  | 31,948,128  | 9        | 21.5             | 4           | 7.0        | L        |
| UBAC2     | chr13      | 99,195,424  | 99,391,499  | 9        | 45.8             | 4           | 14.0       | L        |
| UBR4      | chr1       | 19,069,505  | 19,215,252  | 9        | 136.0            | 8           | 7.0        | L        |
| VPS52     | chr6       | 33,245,271  | 33,276,965  | 9        | 1.6              | 10          | 106.0      | L        |
| ZFAND3    | chr6       | 37,814,530  | 38,159,623  | 9        | 215.8            | 5           | 46.0       | E        |
| ABCD2     | chr12      | 39,546,219  | 39,625,041  | 8        | 142.9            | 8           | 14.0       | E        |
| ADD1      | chr4       | 2,838,856   | 2,935,075   | 8        | -6.6             | 42          | 7.0        | A        |
| AP2B1     | chr17      | 35,582,262  | 35,731,417  | 8        | 62.0             | 13          | 90.0       | L        |
| ARIH1     | chr15      | 72,469,325  | 72,591,555  | 8        | 51.2             | 5           | 7.0        | L        |
| ASXL2     | chr2       | 25,728,752  | 25,883,516  | 8        | -39.8            | 3           | 7.0        | L        |
| ATG5      | chr6       | 106,179,476 | 106,330,820 | 8        | 191.5            | 2           | 0.0        | E        |
| ATP2A2    | chr12      | 110,276,226 | 110,356,092 | 8        | 70.1             | 67          | 22.0       | A        |
| CAMK2D    | chr4       | 113,446,031 | 113,766,927 | 8        | 2.0              | 9           | 106.0      | L        |
| CAMK4     | chr5       | 111,218,652 | 111,499,884 | 8        | 3.3              | 9           | 7.0        | L        |
| CDKAL1    | chr6       | 20,529,456  | 21,237,403  | 8        | -13.1            | 5           | 106.0      | L        |
| DAZAP1    | chr19      | 1,402,568   | 1,440,687   | 8        | -10.9            | 2           | 4.0        | L        |
| DNAJC13   | chr3       | 132,412,659 | 132,544,032 | 8        | 94.4             | 71          | 7.0        | A        |
| DYNC1H1   | chr14      | 101,959,527 | 102,055,798 | 8        | 94.4             | 44          | 7.0        | A        |
| ERC1      | chr12      | 986,207     | 1,500,933   | 8        | 8.6              | 4           | 7.0        | L        |
| FAM13A    | chr4       | 88,720,953  | 89,062,195  | 8        | 80.5             | 1           | 7.0        | L        |
| FOCAD     | chr9       | 20,653,308  | 21,000,955  | 8        | 155.1            | 17          | 7.0        | E        |
| GAK       | chr4       | 844,274     | 937,390     | 8        | 450.7            | 4           | 14.0       | E        |
| GPHN      | chr14      | 66,502,406  | 67,186,808  | 8        | 321.1            | 2           | 0.0        | E        |
| HNRNPUL1  | chr19      | 41,257,475  | 41,312,783  | 8        | 84.6             | 4           | 14.0       | L        |
| HSF2      | chr6       | 122,394,550 | 122,438,119 | 8        | 240.1            | 15          | 14.0       | E        |
| KDM4A     | chr1       | 43,645,125  | 43,710,518  | 8        | 211.0            | 7           | 0.0        | E        |



Table 9: Table of all genes identified within analysis. (continued)

| Gene     | Chromosome | Start Pos.  | End Pos.    | Patients | Freq. Change (%) | Peak Abund. | Long. Obs. | Criteria |
|----------|------------|-------------|-------------|----------|------------------|-------------|------------|----------|
| KMT2C    | chr7       | 152,129,924 | 152,441,005 | 8        | -23.6            | 4           | 7.0        | L        |
| MIR5096  | chr17      | 4,136,088   | 4,245,637   | 8        | -47.2            | 9           | 14.0       | DL       |
| MOB3A    | chr19      | 2,066,035   | 2,101,270   | 8        | 55.5             | 2           | 22.0       | L        |
| MROH1    | chr8       | 144,143,015 | 144,266,940 | 8        | -51.4            | 5           | 46.0       | DL       |
| MUM1     | chr19      | 1,349,976   | 1,383,431   | 8        | -26.0            | 4           | 90.0       | L        |
| NCOA3    | chr20      | 47,496,856  | 47,661,877  | 8        | 2.0              | 6           | 7.0        | L        |
| NEAT1    | chr11      | 65,417,797  | 65,450,538  | 8        | -2.8             | 4           | 22.0       | L        |
| NELL2    | chr12      | 44,503,274  | 44,918,928  | 8        | 20.0             | 2           | 4.0        | L        |
| PHF20L1  | chr8       | 132,770,357 | 132,853,807 | 8        | 36.0             | 4           | 22.0       | L        |
| PLEC     | chr8       | 143,910,146 | 143,981,745 | 8        | -50.1            | 11          | 22.0       | DL       |
| POGZ     | chr1       | 151,397,723 | 151,464,465 | 8        | 52.7             | 26          | 0.0        | A        |
| PTPRA    | chr20      | 2,859,194   | 3,043,669   | 8        | 10.6             | 4           | 1555.0     | L        |
| RNF10    | chr12      | 120,529,328 | 120,582,594 | 8        | 211.0            | 7           | 1.0        | E        |
| RITN     | chr18      | 69,998,805  | 70,210,726  | 8        | -8.9             | 6           | 136.0      | L        |
| SACM1L   | chr3       | 45,684,240  | 45,750,425  | 8        | 191.5            | 11          | 0.0        | E        |
| SLX4IP   | chr20      | 10,430,302  | 10,633,034  | 8        | 66.6             | 3           | 7.0        | L        |
| STAG1    | chr3       | 136,332,156 | 136,757,403 | 8        | 152.7            | 6           | 136.0      | L        |
| STXBP5   | chr6       | 147,199,357 | 147,395,476 | 8        | -8.9             | 8           | 350.0      | L        |
| TANC2    | chr17      | 63,004,536  | 63,432,706  | 8        | 191.5            | 11          | 7.0        | E        |
| TONSL    | chr8       | 144,423,779 | 144,449,429 | 8        | -32.4            | 7           | 7.0        | L        |
| UHRF1BP1 | chr6       | 34,787,016  | 34,882,514  | 8        | 288.7            | 4           | 0.0        | E        |
| VMP1     | chr17      | 59,702,464  | 59,847,255  | 8        | -2.8             | 28          | 46.0       | A        |
| YWHAE    | chr17      | 1,339,539   | 1,405,262   | 8        | 191.5            | 2           | 0.0        | E        |
| ACOX1    | chr17      | 75,936,510  | 75,984,434  | 7        | -30.6            | 2           | 256.0      | L        |
| ASCC3    | chr6       | 100,503,194 | 100,886,372 | 7        | 182.7            | 4           | 7.0        | E        |
| ATF7     | chr12      | 53,502,855  | 53,631,415  | 7        | 12.1             | 32          | 1.0        | A        |
| ATP8A1   | chr4       | 42,403,374  | 42,662,105  | 7        | 19.6             | 4           | 14.0       | L        |
| BACH2    | chr6       | 89,921,527  | 90,301,908  | 7        | 483.1            | 2           | 0.0        | E        |
| C6orf106 | chr6       | 34,582,279  | 34,701,850  | 7        | -2.8             | 3           | 46.0       | L        |
| CASK     | chrX       | 41,509,935  | 41,928,034  | 7        | 29.6             | 5           | 346.0      | L        |
| CCDC47   | chr17      | 63,740,249  | 63,778,728  | 7        | -42.8            | 6           | 22.0       | L        |
| CDC73    | chr1       | 193,116,957 | 193,259,812 | 7        | 123.5            | 19          | 7.0        | E        |
| GATAD2B  | chr1       | 153,799,906 | 153,927,975 | 7        | 6.9              | 2           | 7.0        | L        |
| HTT      | chr4       | 3,069,680   | 3,248,960   | 7        | -2.8             | 25          | 1.0        | A        |
| KLRG1    | chr12      | 8,945,043   | 9,015,744   | 7        | -40.6            | 3           | 7.0        | L        |
| LSM2     | chr6       | 31,792,391  | 31,811,984  | 7        | -53.2            | 2           | 14.0       | DL       |
| MACROD2  | chr20      | 13,990,499  | 16,058,196  | 7        | 240.1            | 1           | 0.0        | E        |
| MAP4K3   | chr2       | 39,244,265  | 39,442,312  | 7        | -2.8             | 15          | 46.0       | L        |
| NAA38    | chr17      | 7,851,680   | 7,890,388   | 7        | -34.5            | 15          | 14.0       | L        |
| NBAS     | chr2       | 15,161,907  | 15,566,348  | 7        | -19.0            | 4           | 106.0      | L        |
| NEMP1    | chr12      | 57,050,642  | 57,083,791  | 7        | 113.8            | 10          | 46.0       | L        |

Table 9: Table of all genes identified within analysis. (*continued*)

| Gene     | Chromosome | Start Pos.  | End Pos.    | Patients | Freq. Change (%) | Peak Abund. | Long. Obs. | Criteria |
|----------|------------|-------------|-------------|----------|------------------|-------------|------------|----------|
| NUP62    | chr19      | 49,901,825  | 49,934,731  | 7        | -42.3            | 5           | 46.0       | L        |
| PIP5K1A  | chr1       | 151,193,543 | 151,254,531 | 7        | 256.3            | 3           | 277.5      | L        |
| PPP1R16A | chr8       | 144,472,981 | 144,507,121 | 7        | -10.3            | 4           | 7.0        | L        |
| PRKCA    | chr17      | 66,297,807  | 66,815,744  | 7        | 51.2             | 7           | 7.0        | L        |
| RAD51B   | chr14      | 67,814,778  | 68,688,106  | 7        | -2.8             | 2           | 22.0       | L        |
| RASA1    | chr5       | 87,263,252  | 87,396,926  | 7        | 205.4            | 3           | 0.0        | E        |
| RFX2     | chr19      | 5,988,163   | 6,115,653   | 7        | 13.4             | 9           | 106.0      | L        |
| SEPT7    | chr7       | 35,795,985  | 35,912,105  | 7        | 175.3            | 10          | 7.0        | E        |
| SNAPC4   | chr9       | 136,370,568 | 136,403,437 | 7        | 34.6             | 7           | 166.0      | L        |
| SPEN     | chr1       | 15,842,863  | 15,945,455  | 7        | 4.7              | 2           | 7.0        | L        |
| SPG7     | chr16      | 89,503,387  | 89,562,768  | 7        | -28.7            | 10          | 7.0        | L        |
| SYNE1    | chr6       | 152,116,683 | 152,642,399 | 7        | -2.8             | 22          | 46.0       | L        |
| SYNE2    | chr14      | 63,847,964  | 64,231,451  | 7        | 12.1             | 8           | 22.0       | L        |
| TAF2     | chr8       | 119,725,773 | 119,837,834 | 7        | 288.7            | 8           | 1.0        | E        |
| THEMIS   | chr6       | 127,703,193 | 127,923,631 | 7        | -35.2            | 5           | 106.0      | L        |
| TTC21B   | chr2       | 165,868,361 | 165,958,838 | 7        | -9.8             | 5           | 46.0       | L        |
| UBE2J2   | chr1       | 1,248,911   | 1,278,854   | 7        | -58.8            | 2           | 166.0      | DL       |
| UBR5     | chr8       | 102,247,273 | 102,417,689 | 7        | 29.6             | 19          | 7.0        | L        |
| VRK3     | chr19      | 49,971,466  | 50,030,548  | 7        | -43.0            | 2           | 7.0        | L        |
| WDR82    | chr3       | 52,249,421  | 52,283,643  | 7        | -11.7            | 7           | 277.5      | L        |
| YTHDF3   | chr8       | 63,163,552  | 63,217,788  | 7        | 8.0              | 13          | 7.0        | L        |
| ANXA1    | chr9       | 73,146,730  | 73,175,394  | 6        | 62.0             | 5           | 14.0       | L        |
| ATP9B    | chr18      | 79,064,274  | 79,383,282  | 6        | 18.8             | 2           | 7.0        | L        |
| BAG6     | chr6       | 31,634,027  | 31,657,700  | 6        | -19.0            | 36          | 46.0       | A        |
| BCAS3    | chr17      | 60,672,774  | 61,397,838  | 6        | -57.7            | 2           | 7.0        | DL       |
| BRWD3    | chrX       | 80,664,487  | 80,814,734  | 6        | 80.5             | 6           | 7.0        | L        |
| CHD1     | chr5       | 98,850,203  | 98,931,534  | 6        | 149.9            | 8           | 1.0        | E        |
| CHMP2B   | chr3       | 87,222,262  | 87,260,548  | 6        | 24.9             | 24          | 7.0        | A        |
| CLASP2   | chr3       | 33,491,245  | 33,723,213  | 6        | 57.9             | 5           | 7.0        | L        |
| DERL2    | chr17      | 5,466,250   | 5,491,230   | 6        | 55.5             | 37          | 0.0        | A        |
| DNAJC1   | chr10      | 21,751,547  | 22,008,721  | 6        | -22.3            | 38          | 7.0        | A        |
| DOT1L    | chr19      | 2,159,148   | 2,237,578   | 6        | -18.2            | 6           | 14.0       | L        |
| FAM117B  | chr2       | 202,630,177 | 202,774,757 | 6        | 385.9            | 6           | 14.0       | E        |
| FUNDC2   | chrX       | 155,021,788 | 155,061,916 | 6        | 321.1            | 9           | 46.0       | E        |
| GNA12    | chr7       | 2,723,105   | 2,849,325   | 6        | 434.5            | 2           | 0.0        | E        |
| IKZF2    | chr2       | 212,994,685 | 213,156,609 | 6        | 434.5            | 1           | 0.0        | E        |
| MIR4745  | chr19      | 799,939     | 810,001     | 6        | 142.9            | 47          | 346.0      | L        |
| MIR5096  | chr1       | 15,866,148  | 15,910,467  | 6        | 18.8             | 2           | 7.0        | DL       |
| MIR5096  | chr22      | 37,663,025  | 38,029,093  | 6        | -25.7            | 6           | 7.0        | DL       |
| MMP23A   | chr1       | 1,627,779   | 1,706,808   | 6        | 4.7              | 17          | 14.0       | L        |
| NFKBIL1  | chr6       | 31,541,850  | 31,563,829  | 6        | -46.7            | 4           | 7.0        | DL       |

Table 9: Table of all genes identified within analysis. (continued)

| Gene       | Chromosome | Start Pos.  | End Pos.    | Patients | Freq. Change (%) | Peak Abund. | Long. Obs. | Criteria |
|------------|------------|-------------|-------------|----------|------------------|-------------|------------|----------|
| OPRM1      | chr6       | 154,005,495 | 154,251,867 | 6        | -2.8             | 3           | 14.0       | L        |
| PAPOLA     | chr14      | 96,497,375  | 96,572,116  | 6        | 418.3            | 3           | 0.0        | E        |
| PCNT       | chr21      | 46,319,121  | 46,450,769  | 6        | 113.8            | 5           | 4.0        | L        |
| PHACTR4    | chr1       | 28,364,581  | 28,505,369  | 6        | -33.2            | 3           | 22.0       | L        |
| RBM27      | chr5       | 146,198,599 | 146,294,221 | 6        | Inf              | 3           | 0.0        | E        |
| RIPOR2     | chr6       | 24,799,280  | 25,047,288  | 6        | -2.8             | 10          | 7.0        | L        |
| RSBN1L     | chr7       | 77,691,425  | 77,784,803  | 6        | 94.4             | 31          | 1.0        | A        |
| SEC23A     | chr14      | 39,026,918  | 39,108,528  | 6        | 14.8             | 7           | 7.0        | L        |
| SPPL3      | chr12      | 120,757,509 | 120,909,352 | 6        | 4.1              | 9           | 14.0       | L        |
| TCF25      | chr16      | 89,868,585  | 89,916,384  | 6        | -45.1            | 5           | 106.0      | L        |
| TRIM33     | chr1       | 114,387,776 | 114,516,160 | 6        | 167.2            | 17          | 106.0      | L        |
| UBE2F-SCLY | chr2       | 237,961,944 | 238,104,413 | 6        | -10.9            | 6           | 46.0       | L        |
| UBE2L3     | chr22      | 21,544,446  | 21,629,034  | 6        | 94.4             | 3           | 7.0        | L        |
| UNKL       | chr16      | 1,358,204   | 1,419,720   | 6        | 18.8             | 7           | 15.0       | L        |
| ZNF473     | chr19      | 50,020,892  | 50,053,774  | 6        | -30.6            | 3           | 22.0       | L        |
| ZNRD1ASP   | chr6       | 29,996,010  | 30,066,189  | 6        | 51.2             | 4           | 122.0      | L        |
| CSNK1G1    | chr15      | 64,160,516  | 64,361,259  | 5        | -11.7            | 8           | 7.0        | L        |
| ECD        | chr10      | 73,129,523  | 73,173,095  | 5        | 191.5            | 24          | 1.0        | A        |
| ELMO1      | chr7       | 36,847,905  | 37,454,326  | 5        | -29.3            | 34          | 46.0       | A        |
| EVL        | chr14      | 99,966,474  | 100,149,236 | 5        | -25.2            | 4           | 7.0        | L        |
| FANCL      | chr2       | 58,154,242  | 58,246,380  | 5        | 434.5            | 6           | 0.0        | E        |
| HSF5       | chr17      | 58,415,166  | 58,493,401  | 5        | -2.8             | 34          | 1.0        | A        |
| IQCB1      | chr3       | 121,764,760 | 121,840,079 | 5        | 62.0             | 79          | 15.0       | A        |
| MARF1      | chr16      | 15,589,368  | 15,648,166  | 5        | 106.5            | 17          | 106.0      | L        |
| KIFC1      | chr6       | 33,386,535  | 33,414,922  | 5        | -2.8             | 42          | 7.0        | A        |
| KMT2D      | chr12      | 49,013,974  | 49,060,324  | 5        | -28.7            | 33          | 0.0        | A        |
| MIR5096    | chr1       | 235,507,822 | 235,723,113 | 5        | 70.1             | 1           | 0.0        | DL       |
| N4BP1      | chr16      | 48,533,725  | 48,615,209  | 5        | 159.1            | 32          | 106.0      | A        |
| PAG1       | chr8       | 80,962,810  | 81,117,068  | 5        | -33.2            | 2           | 32.0       | L        |
| PDE7A      | chr8       | 65,709,333  | 65,846,734  | 5        | 18.8             | 4           | 7.0        | L        |
| PHF20      | chr20      | 35,767,000  | 35,955,366  | 5        | -28.7            | 38          | 7.0        | A        |
| POM121     | chr7       | 72,874,334  | 72,956,440  | 5        | 240.1            | 29          | 1.0        | A        |
| PPFIA1     | chr11      | 70,265,699  | 70,389,501  | 5        | 78.2             | 20          | 106.0      | L        |
| SEC31A     | chr4       | 82,813,508  | 82,905,571  | 5        | -2.8             | 66          | 7.0        | A        |
| SEPT9      | chr17      | 77,276,409  | 77,505,596  | 5        | -44.5            | 27          | 7.0        | A        |
| SF11       | chr22      | 31,491,138  | 31,623,551  | 5        | -55.8            | 24          | 7.0        | DA       |
| SMAP2      | chr1       | 40,368,705  | 40,428,326  | 5        | 45.8             | 61          | 7.0        | A        |
| STAG3      | chr7       | 100,172,723 | 100,219,387 | 5        | 78.2             | 35          | 0.0        | A        |
| STX8       | chr17      | 9,245,470   | 9,580,958   | 5        | 38.8             | 4           | 7.0        | L        |
| TNKS       | chr8       | 9,550,934   | 9,787,346   | 5        | 191.5            | 8           | 7.0        | E        |
| WWOX       | chr16      | 78,094,412  | 79,217,667  | 5        | -17.8            | 5           | 106.0      | L        |

Table 9: Table of all genes identified within analysis. (continued)

| Gene         | Chromosome | Start Pos.  | End Pos.    | Patients | Freq. Change (%) | Peak Abund. | Long. Obs. | Criteria |
|--------------|------------|-------------|-------------|----------|------------------|-------------|------------|----------|
| AGL          | chr1       | 99,845,083  | 99,929,023  | 4        | 871.8            | 4           | 0.0        | E        |
| ANKRD46      | chr8       | 100,504,751 | 100,564,786 | 4        | 29.6             | 24          | 7.0        | A        |
| AQR          | chr15      | 34,851,350  | 34,974,794  | 4        | -15.0            | 84          | 14.0       | A        |
| CAAP1        | chr9       | 26,835,684  | 26,897,828  | 4        | -39.3            | 27          | 46.0       | A        |
| CNOT6        | chr5       | 180,489,398 | 180,583,405 | 4        | -19.0            | 2           | 7.0        | L        |
| EHMT1        | chr9       | 137,758,021 | 137,769,772 | 4        | 62.0             | 1           | 0.0        | L        |
| EXOSC10      | chr1       | 11,061,612  | 11,104,910  | 4        | 13.4             | 70          | 7.0        | A        |
| GOLPH3L      | chr1       | 150,641,224 | 150,702,196 | 4        | -51.4            | 24          | 7.0        | A        |
| KDM5D        | chrY       | 19,700,414  | 19,749,939  | 4        | 62.0             | 2           | 14.0       | A        |
| MAD1L1       | chr7       | 1,810,791   | 2,237,948   | 4        | -20.5            | 35          | 46.0       | A        |
| MAP2K2       | chr19      | 4,085,321   | 4,129,129   | 4        | -2.8             | 2           | 106.0      | L        |
| MEMO1        | chr2       | 31,862,809  | 32,016,052  | 4        | -64.7            | 47          | 7.0        | A        |
| MSH5-SAPCD1  | chr6       | 31,734,947  | 31,769,847  | 4        | -67.6            | 43          | 7.0        | A        |
| MTMR3        | chr22      | 29,878,168  | 30,035,868  | 4        | -45.3            | 261         | 106.0      | A        |
| OGDH         | chr7       | 44,601,521  | 44,714,070  | 4        | -48.9            | 17          | 332.0      | L        |
| PATL1        | chr11      | 59,631,715  | 59,674,038  | 4        | 29.6             | 578         | 332.0      | A        |
| PDCD11       | chr10      | 103,391,654 | 103,451,262 | 4        | 94.4             | 27          | 152.0      | A        |
| PDE3B        | chr11      | 14,638,722  | 14,877,058  | 4        | 29.6             | 35          | 7.0        | A        |
| RAB18        | chr10      | 27,499,173  | 27,547,237  | 4        | -22.3            | 24          | 7.0        | A        |
| RMND5A       | chr2       | 86,715,290  | 86,783,041  | 4        | Inf              | 26          | 0.0        | A        |
| RPA3         | chr7       | 7,631,562   | 7,723,607   | 4        | 21.5             | 87          | 106.0      | A        |
| TRIO         | chr5       | 14,138,701  | 14,515,204  | 4        | 580.2            | 61          | 106.0      | A        |
| XPO1         | chr2       | 61,472,933  | 61,543,283  | 4        | 21.5             | 25          | 106.0      | A        |
| AKAP9        | chr7       | 91,935,874  | 92,115,673  | 3        | -22.3            | 25          | 0.0        | A        |
| CHD1L        | chr1       | 147,168,193 | 147,300,766 | 3        | Inf              | 25          | 1.0        | A        |
| DCUN1D4      | chr4       | 51,837,999  | 51,921,837  | 3        | -19.0            | 32          | 106.0      | A        |
| EIF2AK4      | chr15      | 39,929,123  | 40,040,596  | 3        | 385.9            | 43          | 7.0        | A        |
| NGDN         | chr14      | 23,464,688  | 23,483,193  | 3        | 45.8             | 44          | 0.0        | A        |
| PRKD2        | chr19      | 46,669,315  | 46,722,127  | 3        | 62.0             | 24          | 22.0       | A        |
| RABGAP1      | chr9       | 122,936,008 | 123,109,868 | 3        | -32.0            | 29          | 7.0        | A        |
| SNAP29       | chr22      | 20,854,003  | 20,896,213  | 3        | 288.7            | 27          | 7.0        | A        |
| ZNF573       | chr19      | 37,733,301  | 37,784,590  | 3        | -22.3            | 86          | 735.0      | A        |
| C20orf196    | chr20      | 5,745,386   | 5,869,407   | 2        | -35.2            | 1           | 0.0        | A        |
| CRTAP        | chr3       | 33,108,957  | 33,152,773  | 2        | 94.4             | 35          | 7.0        | A        |
| GPN1         | chr2       | 27,623,647  | 27,655,846  | 2        | -2.8             | 62          | 1.0        | A        |
| JMJD6        | chr17      | 76,707,831  | 76,731,799  | 2        | 94.4             | 53          | 1.0        | A        |
| KCTD3        | chr1       | 215,562,378 | 215,626,821 | 2        | -51.4            | 1           | 0.0        | A        |
| LINC01473    | chr2       | 186,028,533 | 186,091,317 | 2        | Inf              | 82          | 7.0        | A        |
| LOC101927151 | chr19      | 27,788,466  | 27,811,780  | 2        | 94.4             | 31          | 46.0       | A        |
| PHF12        | chr17      | 28,900,252  | 28,956,490  | 2        | -22.3            | 40          | 106.0      | A        |
| POLG2        | chr17      | 64,472,784  | 64,502,066  | 2        | 21.5             | 43          | 7.0        | A        |

Table 9: Table of all genes identified within analysis. (*continued*)

| Gene        | Chromosome | Start Pos.  | End Pos.    | Patients | Freq. Change (%) | Peak Abund. | Long. Obs. | Criteria |
|-------------|------------|-------------|-------------|----------|------------------|-------------|------------|----------|
| RASEF       | chr9       | 82,974,584  | 83,068,128  | 2        | Inf              | 43          | 46.0       | A        |
| SNHG12      | chr1       | 28,573,537  | 28,586,854  | 2        | 191.5            | 96          | 332.0      | A        |
| TAC3        | chr12      | 57,004,996  | 57,021,560  | 2        | -67.6            | 42          | 7.0        | A        |
| TGFBR2      | chr3       | 30,601,501  | 30,699,141  | 2        | 94.4             | 31          | 7.0        | A        |
| ACTL6A      | chr3       | 179,557,879 | 179,593,405 | 1        | -80.6            | 40          | 0.0        | A        |
| C19orf48    | chr19      | 50,792,692  | 50,809,853  | 1        | -2.8             | 28          | 46.0       | A        |
| CD109       | chr6       | 73,691,084  | 73,833,317  | 1        | -87.9            | 32          | 0.0        | A        |
| IFNGR2      | chr21      | 33,397,895  | 33,442,521  | 1        | Inf              | 53          | 15.0       | A        |
| KARS        | chr16      | 75,622,723  | 75,652,687  | 1        | -2.8             | 24          | 0.0        | A        |
| MICAL2      | chr11      | 12,105,575  | 12,268,790  | 1        | -51.4            | 39          | 15.0       | A        |
| RBAK-RBAKDN | chr7       | 5,040,820   | 5,078,223   | 1        | -2.8             | 28          | 7.0        | A        |
| RTCA-AS1    | chr1       | 100,259,741 | 100,271,174 | 1        | Inf              | 27          | 0.0        | A        |
| UXT-AS1     | chrX       | 47,653,832  | 47,665,111  | 1        | Inf              | 43          | 7.0        | A        |
| ZNF92       | chr7       | 65,368,798  | 65,406,135  | 1        | Inf              | 42          | 7.0        | A        |
| SIRT3       | chr11      | 210,029     | 241,362     | 10       | -44.8            | 4           | 1.0        | D        |
| IP6K1       | chr3       | 49,719,294  | 49,791,540  | 9        | -57.9            | 2           | 1.0        | D        |
| NPEPPS      | chr17      | 47,517,956  | 47,628,276  | 9        | -55.1            | 3           | 14.0       | D        |
| ANKFY1      | chr17      | 4,158,817   | 4,268,995   | 8        | -46.0            | 9           | 14.0       | D        |
| EIF2B3      | chr1       | 44,845,521  | 44,991,722  | 8        | -67.6            | 6           | 1.0        | D        |
| TRAF2       | chr9       | 136,881,512 | 136,931,615 | 8        | -59.7            | 4           | 46.0       | D        |
| TSC2        | chr16      | 2,042,894   | 2,093,720   | 8        | -51.4            | 1           | 22.0       | D        |
| WDR90       | chr16      | 644,362     | 672,829     | 8        | -53.5            | 3           | 0.0        | D        |
| HCG20       | chr6       | 30,761,824  | 30,797,250  | 7        | -48.9            | 4           | 22.0       | D        |
| NARFL       | chr16      | 724,754     | 746,038     | 7        | -61.1            | 3           | 22.0       | D        |
| PPP3CC      | chr8       | 22,435,969  | 22,546,144  | 7        | -53.2            | 3           | 0.0        | D        |
| IFT140      | chr16      | 1,505,426   | 1,617,108   | 6        | -51.4            | 3           | 7.0        | D        |
| QRICH1      | chr3       | 49,024,706  | 49,099,373  | 6        | -59.0            | 7           | 1.0        | D        |
| EXOC2       | chr6       | 480,137     | 698,141     | 5        | -71.4            | 4           | 0.0        | D        |
| HAGH        | chr16      | 1,804,102   | 1,832,194   | 5        | -58.4            | 6           | 14.0       | D        |
| RNPS1       | chr16      | 2,248,115   | 2,273,412   | 5        | -77.5            | 2           | 0.0        | D        |
| USP34       | chr2       | 61,182,454  | 61,475,714  | 5        | -61.1            | 2           | 0.0        | D        |
| WNK1        | chr12      | 747,922     | 916,452     | 5        | -51.4            | 4           | 1.0        | D        |
| ZNF598      | chr16      | 1,992,651   | 2,014,821   | 4        | -55.8            | 3           | 0.0        | D        |

Supplementary Report 3:  
Genes of interest marked by vector integration  
ALL Patients only (CR/PRtd & PR/NR Response Groups)

**Contents**

|                                               |          |
|-----------------------------------------------|----------|
| <b>Summary</b>                                | <b>2</b> |
| Integration Frequency (Enrichment) . . . . .  | 6        |
| Genes with the Most Abundant Clones . . . . . | 7        |
| <b>Reference Data</b>                         | <b>8</b> |
| <b>Comprehensive Genes of Interest Table</b>  | <b>9</b> |

---

## Summary

Lentiviral vectors integrate into genomes of targeted host cells (Tcells). These genomic locations of vector integrations are identifiable through integration site sequencing. Abundances of individual cell clones can be inferred by the sonicLength method (**Berry *et al.* 2012**).

In this report, we mined the data collected from integration site sequencing for 11 CART treated subjects. We constructed 4 gene lists based on: 1 & 2) increased / decreased integration site occurrence in patient samples relative to the initial transduction product, 3) peak clonal abundance, and 4) longitudinal clonal persistence. More about each of these criteria is below:

- **Integration Frequency** is the rate at which integration sites are observed within a gene. This is compared between patient samples and the initial transduction product to score enrichment or depletion during growth in patients. The top of genes with higher patient sample integration frequency over transduction samples were chosen for study (p-value  $\leq 0.05$  after exclusion of genes with clones from less than 2 patients and less than 10 observed clones).
- **Clonal Abundance** can be determined during analysis by quantifying the number of sites of linker ligation associated with each unique integration site. This method is further described in **Berry *et al.* 2012**. This allows clonal expansion to be quantified. The top 1% of the genes were selected for study based on their maximal peak clonal abundance.
- **Longitudinal Observation** of clones is the quantification of observed timespans and last observed timepoints. The maximum value for clones within a gene were considered for characterization of the gene in this analysis. Genes were only considered if there were 10 or more integration sites isolated from at least two different patient samples. Genes were also not considered if they only consisted of clones which were observed once or the last observed timepoint was less than 90 days from initial infusion.

A point to keep in mind through all this analysis is that integration sites are sampled from a larger population. It would be rare for all integration sites in a sample to be represented in the sequence data.

Table 1: Summary of each filtering criteria.

| Criteria     | Gene  | Onco        | Tumor           | Lymphoma    | COSMIC      | TCGA        | Clonal Hema. |
|--------------|-------|-------------|-----------------|-------------|-------------|-------------|--------------|
|              | Count | Related (%) | Suppressors (%) | Related (%) | Related (%) | Related (%) | Related (%)  |
| Enrichment   | 2     | */ * 100.0  | / 50.0          | / 0         | */ * 100.0  | / 50.0      | */ * 50.00   |
| Depletion    | 0     | NA/NA       | NA/NA           | NA/NA       | NA/NA       | NA/NA       | NA/NA        |
| Abundance    | 40    | */ * 22.5   | / 12.5          | / 0         | */ * 15.0   | */ * 12.5   | / 0.00       |
| Longitudinal | 0     | NA/NA       | NA/NA           | NA/NA       | NA/NA       | NA/NA       | NA/NA        |
| Composite    | 41    | */ * 24.4   | */ 14.6         | / 0         | */ * 17.1   | */ * 14.6   | / 2.44       |

**Table 1** summarizes the size and contents of each criteria gene list identified by the various methods. Significance of overlap between lists are displayed by asterisks before the percent of genes identified from the criteria list which overlap with the column specified group. The asterisk to the left of the “/” indicates a p-value below 0.05 *before* multiple comparison corrections, while an asterisk to the right of the “/” indicates a p-value below 0.05 *after* multiple comparison corrections. Significance was tested using Fishers Exact test and multiple comparison corrections were made using a Benjamini-Hochberg (FDR) method for each criteria based list.

Percent of all analyzed transcription units associated with each list as as follows:

- Onco Related: 10.52%
- Tumor Suppressors: 5.13%
- Lymphoma Related: 0.21%
- COSMIC Related: 4.32%
- TCGA Related: 3.19%
- Clonal Hematopoiesis Related: 0.22%

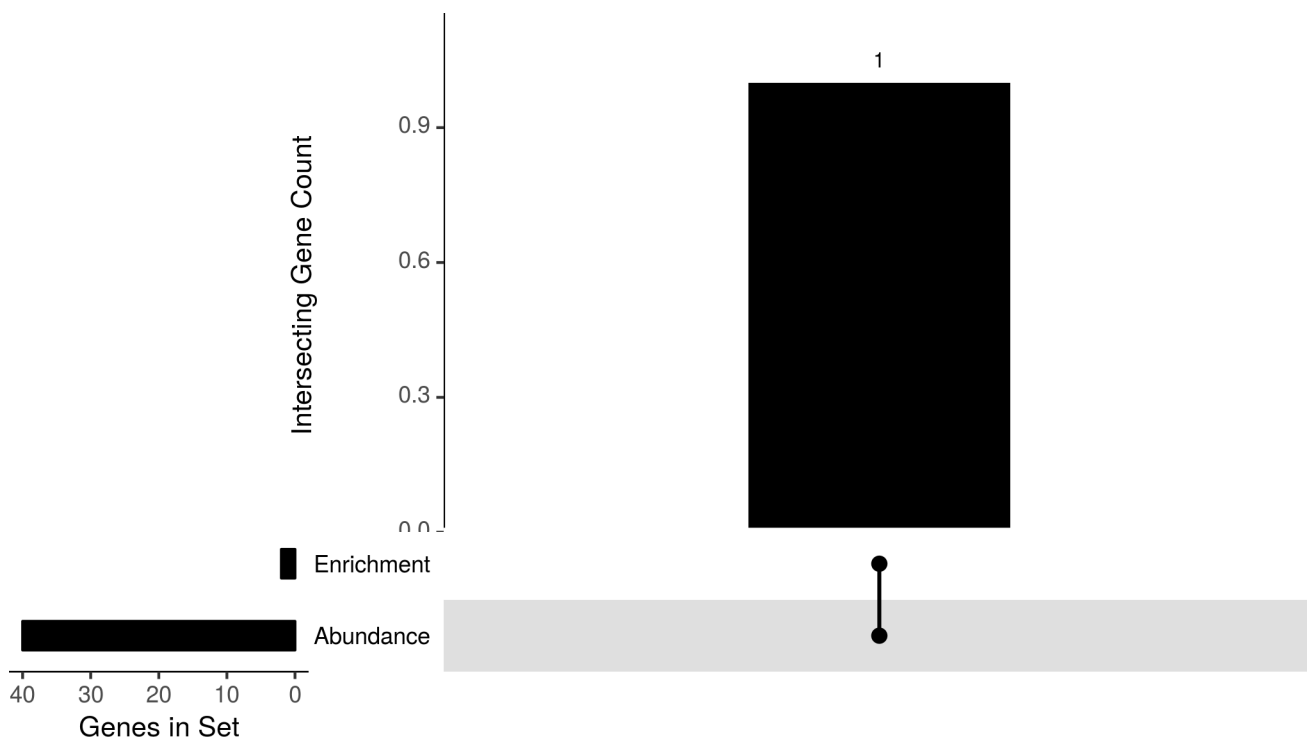

Figure 1: Intersecting gene lists identified through the various selection criteria.



Table 2: The most consistently observed genes from filtering by various criteria. The 'Criteria.' column is a count of how many times the gene was identified by these methods, while the 'Patients' column notes how many specimens collected from patients have had integration sites within the noted gene.

| Gene   | Patients | Freq. Change (%) | Peak Abund. | Long. Obs. | Criteria |
|--------|----------|------------------|-------------|------------|----------|
| RNF213 | 3        | 136.9            | 5           | 28         | EA       |

Table 3: GO Biological Process. Top 1 per group. Total genes considered: 35

| Group | GO ID      | GO Term                                     | Term Size | Gene Count | Adjusted P-value |
|-------|------------|---------------------------------------------|-----------|------------|------------------|
| 1     | GO:0006325 | chromatin organization                      | 478       | 8          | 0.0169989        |
| 2     | GO:0048534 | hematopoietic or lymphoid organ development | 471       | 7          | 0.0169989        |

## Integration Frequency (Enrichment)

Table 4: Table of top 2 genes with the most frequent clonal enrichment.

| Gene   | Num. Patients | TDN Sites | Patient Sites | Onco-Related | Frequency Increase (%) |
|--------|---------------|-----------|---------------|--------------|------------------------|
| CREBBP | 4             | 36        | 11            | TRUE         | 218.6                  |
| RNF213 | 3             | 44        | 10            | TRUE         | 136.9                  |

## Genes with the Most Abundant Clones

Table 5: Table of top 40 Genes containing the highest abundant clones.

| Gene           | Num. Patients | Peak Abundance | Peak Rel. Abund. | Clonal Gini Index | Onco-Related |
|----------------|---------------|----------------|------------------|-------------------|--------------|
| ATAT1          | 1             | 13             | 0.520            | 0.000             | FALSE        |
| KIF1B          | 3             | 12             | 0.038            | 0.550             | FALSE        |
| PIAS2          | 1             | 10             | 0.054            | 0.000             | FALSE        |
| DSE            | 2             | 9              | 0.029            | 0.400             | FALSE        |
| PGD            | 1             | 9              | 0.030            | 0.400             | FALSE        |
| DUSP16         | 1             | 8              | 0.121            | 0.000             | FALSE        |
| AHRR           | 2             | 7              | 0.042            | 0.444             | FALSE        |
| BAZ2A          | 1             | 7              | 0.023            | 0.000             | FALSE        |
| HNRNPUL2-BSCL2 | 2             | 7              | 0.023            | 0.400             | FALSE        |
| PPP6R3         | 3             | 7              | 0.022            | 0.408             | FALSE        |
| ERP44          | 1             | 6              | 0.019            | 0.000             | FALSE        |
| FANCA          | 5             | 6              | 0.009            | 0.301             | TRUE         |
| HOPX           | 1             | 6              | 0.036            | 0.000             | FALSE        |
| LYPLAL1        | 1             | 6              | 0.037            | 0.000             | FALSE        |
| MRE11          | 1             | 6              | 0.037            | 0.000             | TRUE         |
| PPP3CA         | 3             | 6              | 0.013            | 0.400             | FALSE        |
| UBR2           | 4             | 6              | 0.019            | 0.357             | FALSE        |
| ZNF354B        | 1             | 6              | 0.019            | 0.000             | FALSE        |
| ABHD17A        | 1             | 5              | 0.031            | 0.000             | FALSE        |
| AP3B1          | 2             | 5              | 0.006            | 0.381             | FALSE        |
| APOF           | 1             | 5              | 0.031            | 0.000             | FALSE        |
| ARNT           | 1             | 5              | 0.005            | 0.333             | TRUE         |
| C3orf58        | 2             | 5              | 0.016            | 0.333             | FALSE        |
| DNMT1          | 3             | 5              | 0.007            | 0.311             | TRUE         |
| EML5           | 1             | 5              | 0.030            | 0.000             | FALSE        |
| IPO7           | 2             | 5              | 0.139            | 0.333             | FALSE        |
| KMT2C          | 3             | 5              | 0.016            | 0.333             | TRUE         |
| MAN1A2         | 2             | 5              | 0.027            | 0.333             | FALSE        |
| NLRC3          | 1             | 5              | 0.030            | 0.000             | FALSE        |
| PHF20          | 1             | 5              | 0.006            | 0.333             | TRUE         |
| PIP4K2A        | 1             | 5              | 0.030            | 0.000             | FALSE        |
| POT1           | 2             | 5              | 0.016            | 0.333             | FALSE        |
| PSMD13         | 2             | 5              | 0.005            | 0.375             | FALSE        |
| RCAN3          | 2             | 5              | 0.016            | 0.333             | FALSE        |
| RNF157         | 3             | 5              | 0.076            | 0.257             | TRUE         |
| RNF213         | 3             | 5              | 0.016            | 0.257             | TRUE         |
| SET            | 1             | 5              | 0.016            | 0.000             | TRUE         |
| SLC44A2        | 2             | 5              | 0.017            | 0.346             | FALSE        |
| SNX13          | 3             | 5              | 0.007            | 0.333             | FALSE        |
| UTY            | 2             | 5              | 0.016            | 0.361             | FALSE        |

## Reference Data

The NCBI RefGenes data set was used to identify gene regions (hg38) while genes identified as onco-related were from the Bushman Lab curated list of **onco-related genes**.

Gene Ontologies were extracted from the `GO.db` R-package (v3.4.1). KEGG pathways were acquired via interfacing with the KEGG web-server API through the `KEGGREST` R-package (v1.16.1). Gene lists, including RefSeq genes used for annotation of integration sites, were standardized to HGNC gene symbols (date: 2018-02-07). Groups identified in GO and KEGG analyses were determined from Jaccard distances between identified terms, followed by modularity-optimizing clustering from a weighted-undirected graph using a Louvain algorithm (**Blondel *et al.* 2008**). Terms within groups of GO or KEGG terms have greater overlap of gene lists between themselves than between terms found in other groups. This method was implemented to help reduce the functional redundancy commonly observed in GO and overlapping pathways observed with KEGG.

## Comprehensive Genes of Interest Table

Table 6: Table of all genes identified within analysis.

| Gene    | Chromosome | Start Pos.  | End Pos.    | Patients | Freq. Change (%) | Peak Abund. | Long. Obs. | Criteria |
|---------|------------|-------------|-------------|----------|------------------|-------------|------------|----------|
| RNF213  | chr17      | 80,255,860  | 80,403,781  | 3        | 136.9            | 5           | 0          | EA       |
| FANCA   | chr16      | 89,732,550  | 89,821,657  | 5        | 18.5             | 6           | 0          | A        |
| CREBBP  | chr16      | 3,720,054   | 3,885,120   | 4        | 218.6            | 2           | 0          | E        |
| UBR2    | chr6       | 42,559,021  | 42,698,505  | 4        | 32.7             | 6           | 0          | A        |
| DNMT1   | chr19      | 10,128,343  | 10,200,135  | 3        | 0.9              | 5           | 0          | A        |
| KIF1B   | chr1       | 10,205,705  | 10,386,603  | 3        | 189.6            | 12          | 0          | A        |
| KMT2C   | chr7       | 152,129,924 | 152,441,005 | 3        | 247.5            | 5           | 0          | A        |
| PPP3CA  | chr4       | 101,018,429 | 101,352,471 | 3        | 178.0            | 6           | 0          | A        |
| PPP6R3  | chr11      | 68,455,717  | 68,620,333  | 3        | 69.7             | 7           | 0          | A        |
| RNF157  | chr17      | 76,137,452  | 76,245,311  | 3        | -20.4            | 5           | 0          | A        |
| SNX13   | chr7       | 17,785,760  | 17,945,508  | 3        | 468.7            | 5           | 0          | A        |
| AHRR    | chr5       | 299,175     | 443,290     | 2        | -13.1            | 7           | 0          | A        |
| AP3B1   | chr5       | 77,997,325  | 78,299,755  | 2        | 247.5            | 5           | 0          | A        |
| ATAT1   | chr6       | 30,621,841  | 30,651,823  | 2        | 197.9            | 13          | 0          | A        |
| DSE     | chr6       | 116,249,151 | 116,443,291 | 2        | 1985.1           | 9           | 0          | A        |
| IPO7    | chr11      | 9,379,621   | 9,453,127   | 2        | 131.7            | 5           | 0          | A        |
| MAN1A2  | chr1       | 117,362,462 | 117,530,698 | 2        | 247.5            | 5           | 0          | A        |
| POT1    | chr7       | 124,817,385 | 124,934,983 | 2        | 131.7            | 5           | 0          | A        |
| PSMD13  | chr11      | 231,807     | 257,984     | 2        | -19.8            | 5           | 0          | A        |
| RCAN3   | chr1       | 24,497,350  | 24,542,020  | 2        | 4.3              | 5           | 0          | A        |
| SLC44A2 | chr19      | 10,597,444  | 10,649,559  | 2        | 78.7             | 5           | 0          | A        |
| UTY     | chrY       | 13,243,378  | 13,485,670  | 2        | 681.9            | 2           | 0          | A        |
| ARNT    | chr1       | 150,804,704 | 150,881,768 | 1        | -9.3             | 5           | 0          | A        |
| BAZ2A   | chr12      | 56,590,595  | 56,641,379  | 1        | -25.5            | 7           | 0          | A        |
| DUSP16  | chr12      | 12,468,281  | 12,567,514  | 1        | -19.8            | 8           | 0          | A        |
| EML5    | chr14      | 88,609,829  | 88,797,752  | 1        | 421.3            | 5           | 0          | A        |
| ERP44   | chr9       | 99,974,180  | 100,104,052 | 1        | 108.5            | 6           | 0          | A        |
| HOPX    | chr4       | 56,642,987  | 56,686,706  | 1        | Inf              | 6           | 0          | A        |
| LYPLAL1 | chr1       | 219,168,830 | 219,217,865 | 1        | 73.8             | 6           | 0          | A        |
| MRE11   | chr11      | 94,412,300  | 94,498,908  | 1        | 73.8             | 6           | 0          | A        |
| NLRC3   | chr16      | 3,534,035   | 3,582,404   | 1        | 48.9             | 5           | 0          | A        |
| PGD     | chr1       | 10,393,991  | 10,425,511  | 1        | Inf              | 9           | 0          | A        |
| PHF20   | chr20      | 35,767,000  | 35,955,366  | 1        | 22.7             | 5           | 0          | A        |
| PIAS2   | chr18      | 46,798,224  | 46,925,167  | 1        | 48.9             | 10          | 0          | A        |
| PIP4K2A | chr10      | 22,529,836  | 22,719,574  | 1        | 108.5            | 5           | 0          | A        |
| SET     | chr9       | 128,678,654 | 128,701,396 | 1        | 15.8             | 5           | 11         | A        |
| ZNF354B | chr5       | 178,854,952 | 178,889,423 | 1        | 247.5            | 6           | 0          | A        |

Supplementary Report 4:  
Genes of interest marked by vector integration  
Response Group CR/PRtd only (CLL & ALL Patients)

**Contents**

|                                               |           |
|-----------------------------------------------|-----------|
| <b>Summary</b>                                | <b>2</b>  |
| Integration Frequency (Enrichment) . . . . .  | 7         |
| Integration Frequency (Depletion) . . . . .   | 8         |
| Genes with the Most Abundant Clones . . . . . | 9         |
| Longitudinal Observation . . . . .            | 10        |
| <b>Reference Data</b>                         | <b>11</b> |
| <b>Comprehensive Genes of Interest Table</b>  | <b>12</b> |

---



## Summary

Lentiviral vectors integrate into genomes of targeted host cells (Tcells). These genomic locations of vector integrations are identifiable through integration site sequencing. Abundances of individual cell clones can be inferred by the sonicLength method (**Berry *et al.* 2012**).

In this report, we mined the data collected from integration site sequencing for 20 CART treated subjects. We constructed 4 gene lists based on: 1 & 2) increased / decreased integration site occurrence in patient samples relative to the initial transduction product, 3) peak clonal abundance, and 4) longitudinal clonal persistence. More about each of these criteria is below:

- **Integration Frequency** is the rate at which integration sites are observed within a gene. This is compared between patient samples and the initial transduction product to score enrichment or depletion during growth in patients. The top of genes with higher patient sample integration frequency over transduction samples were chosen for study (p-value  $\leq 0.05$  after exclusion of genes with clones from less than 2 patients and less than 10 observed clones).
- **Clonal Abundance** can be determined during analysis by quantifying the number of sites of linker ligation associated with each unique integration site. This method is further described in **Berry *et al.* 2012**. This allows clonal expansion to be quantified. The top 1% of the genes were selected for study based on their maximal peak clonal abundance.
- **Longitudinal Observation** of clones is the quantification of observed timespans and last observed timepoints. The maximum value for clones within a gene were considered for characterization of the gene in this analysis. Genes were only considered if there were 10 or more integration sites isolated from at least two different patient samples. Genes were also not considered if they only consisted of clones which were observed once or the last observed timepoint was less than 90 days from initial infusion.

A point to keep in mind through all this analysis is that integration sites are sampled from a larger population. It would be rare for all integration sites in a sample to be represented in the sequence data.

Table 1: Summary of each filtering criteria.

| Criteria     | Gene  | Onco        | Tumor           | Lymphoma    | COSMIC      | TCGA        | Clonal Hema. |
|--------------|-------|-------------|-----------------|-------------|-------------|-------------|--------------|
|              | Count | Related (%) | Suppressors (%) | Related (%) | Related (%) | Related (%) | Related (%)  |
| Enrichment   | 278   | */* 21.2    | */* 11.15       | / 0.360     | */* 12.23   | */* 9.35    | */* 1.079    |
| Depletion    | 4     | / 0.0       | / 0.00          | / 0.000     | / 0.00      | / 0.00      | / 0.000      |
| Abundance    | 119   | */* 20.2    | / 5.88          | / 0.000     | */* 9.24    | / 5.04      | / 0.840      |
| Longitudinal | 208   | */* 25.5    | */* 12.02       | / 0.481     | */* 12.50   | */* 12.02   | */* 1.442    |
| Composite    | 501   | */* 20.2    | */* 9.38        | / 0.200     | */* 10.78   | */* 8.18    | / 0.599      |

**Table 1** summarizes the size and contents of each criteria gene list identified by the various methods. Significance of overlap between lists are displayed by asterisks before the percent of genes identified from the criteria list which overlap with the column specified group. The asterisk to the left of the “/” indicates a p-value below 0.05 *before* multiple comparison corrections, while an asterisk to the right of the “/” indicates a p-value below 0.05 *after* multiple comparison corrections. Significance was tested using Fishers Exact test and multiple comparison corrections were made using a Benjamini-Hochberg (FDR) method for each criteria based list.

Percent of all analyzed transcription units associated with each list as as follows:

- Onco Related: 9.41%
- Tumor Suppressors: 4.91%
- Lymphoma Related: 0.16%
- COSMIC Related: 3.78%
- TCGA Related: 2.88%
- Clonal Hematopoiesis Related: 0.18%

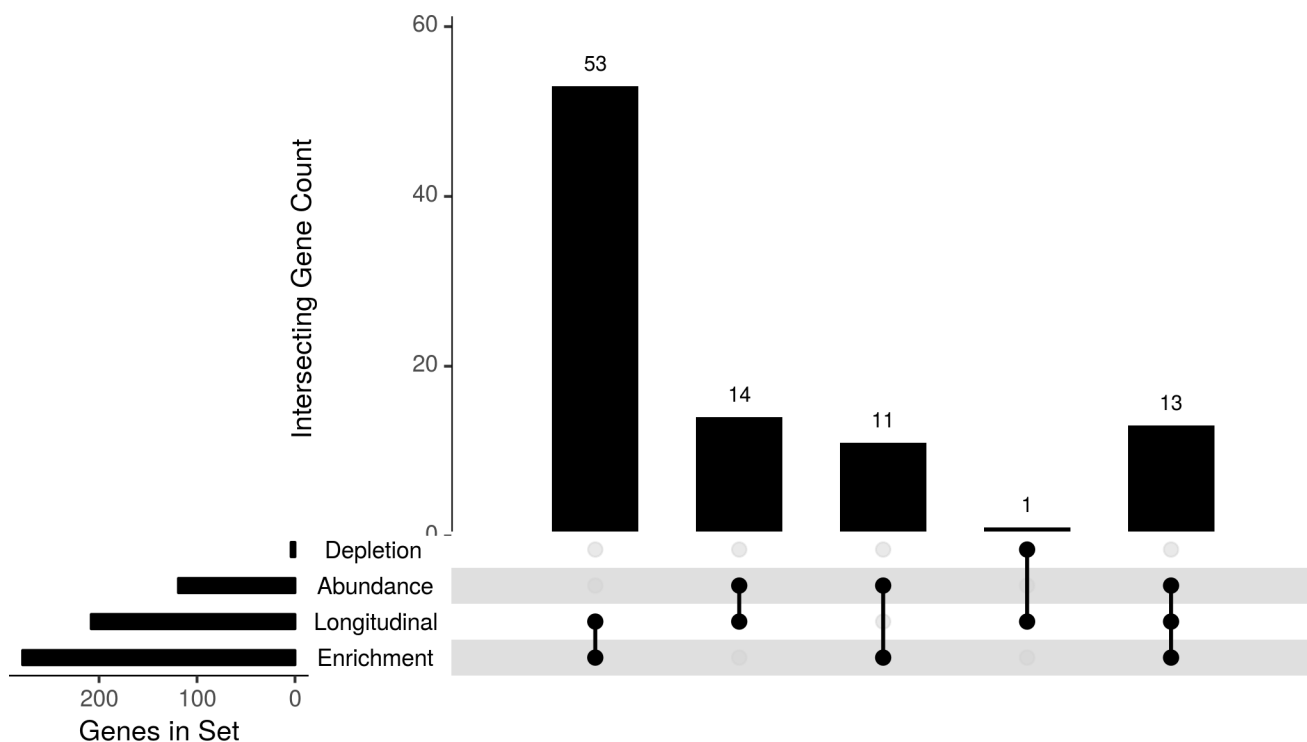

Figure 1: Intersecting gene lists identified through the various selection criteria.

Table 2: The most consistently observed genes from filtering by various criteria. The 'Criteria.' column is a count of how many times the gene was identified by these methods, while the 'Patients' column notes how many specimens collected from patients have had integration sites within the noted gene.

| Gene     | Patients | Freq. Change (%) | Peak Abund. | Long. Obs. | Criteria |
|----------|----------|------------------|-------------|------------|----------|
| VAV1     | 13       | 110.6            | 37          | 180        | EAL      |
| RNF157   | 12       | 77.8             | 28          | 180        | EAL      |
| AKAP13   | 11       | 340.6            | 27          | 360        | EAL      |
| CARD8    | 11       | 74.4             | 79          | 180        | EAL      |
| ZZEF1    | 11       | 64.4             | 56          | 360        | EAL      |
| CRAMP1   | 10       | 53.1             | 30          | 548        | EAL      |
| PAFAH1B1 | 10       | 110.7            | 30          | 360        | EAL      |
| SRCAP    | 10       | 137.3            | 373         | 360        | EAL      |
| UBAP2L   | 10       | 235.7            | 30          | 180        | EAL      |
| ST13     | 8        | 153.7            | 29          | 180        | EAL      |
| CLK4     | 7        | 259.0            | 53          | 120        | EAL      |
| PTBP1    | 7        | 316.1            | 47          | 360        | EAL      |
| TET2     | 5        | 450.8            | 814         | 1584       | EAL      |

Table 3: GO Biological Process. Top 7 per group. Total genes considered: 446

| Group | GO ID      | GO Term                                                                 | Term Size | Gene Count | Ad-justed P-value |
|-------|------------|-------------------------------------------------------------------------|-----------|------------|-------------------|
| 1     | GO:0016569 | covalent chromatin modification                                         | 436       | 52         | 0.0000000         |
|       | GO:0016570 | histone modification                                                    | 353       | 45         | 0.0000000         |
|       | GO:0018205 | peptidyl-lysine modification                                            | 295       | 41         | 0.0000000         |
|       | GO:0033044 | regulation of chromosome organization                                   | 243       | 22         | 0.0095290         |
|       | GO:0043414 | macromolecule methylation                                               | 219       | 21         | 0.0063044         |
|       | GO:0006479 | protein methylation                                                     | 142       | 19         | 0.0001415         |
|       | GO:0008213 | protein alkylation                                                      | 142       | 19         | 0.0001415         |
| 2     | GO:0071407 | cellular response to organic cyclic compound                            | 390       | 32         | 0.0049931         |
|       | GO:0032101 | regulation of response to external stimulus                             | 426       | 30         | 0.0393697         |
|       | GO:0060322 | head development                                                        | 430       | 30         | 0.0432584         |
|       | GO:0071396 | cellular response to lipid                                              | 338       | 29         | 0.0045652         |
|       | GO:0007420 | brain development                                                       | 407       | 29         | 0.0384799         |
|       | GO:0043009 | chordate embryonic development                                          | 323       | 25         | 0.0326732         |
|       | GO:0009792 | embryo development ending in birth or egg hatching                      | 326       | 25         | 0.0328006         |
| 3     | GO:0043632 | modification-dependent macromolecule catabolic process                  | 477       | 39         | 0.0014114         |
|       | GO:0006511 | ubiquitin-dependent protein catabolic process                           | 464       | 38         | 0.0016770         |
|       | GO:0019941 | modification-dependent protein catabolic process                        | 469       | 38         | 0.0020971         |
|       | GO:0010498 | proteasomal protein catabolic process                                   | 350       | 28         | 0.0136100         |
|       | GO:0043161 | proteasome-mediated ubiquitin-dependent protein catabolic process       | 325       | 26         | 0.0188227         |
|       | GO:0034976 | response to endoplasmic reticulum stress                                | 203       | 17         | 0.0407180         |
|       | GO:0032434 | regulation of proteasomal ubiquitin-dependent protein catabolic process | 97        | 10         | 0.0431798         |
| 4     | GO:0051223 | regulation of protein transport                                         | 495       | 41         | 0.0007062         |
|       | GO:0006397 | mRNA processing                                                         | 394       | 37         | 0.0001124         |
|       | GO:1903827 | regulation of cellular protein localization                             | 427       | 37         | 0.0006504         |
|       | GO:0010608 | posttranscriptional regulation of gene expression                       | 412       | 34         | 0.0032284         |
|       | GO:1902582 | single-organism intracellular transport                                 | 484       | 33         | 0.0419393         |
|       | GO:0051169 | nuclear transport                                                       | 347       | 32         | 0.0006481         |
|       | GO:0032386 | regulation of intracellular transport                                   | 351       | 32         | 0.0007989         |
| 5     | GO:0010256 | endomembrane system organization                                        | 460       | 41         | 0.0001305         |
|       | GO:0051640 | organelle localization                                                  | 378       | 32         | 0.0031081         |
|       | GO:0044770 | cell cycle phase transition                                             | 449       | 31         | 0.0442715         |
|       | GO:0051656 | establishment of organelle localization                                 | 322       | 30         | 0.0009015         |
|       | GO:0000226 | microtubule cytoskeleton organization                                   | 377       | 28         | 0.0328006         |
|       | GO:0097435 | supramolecular fiber organization                                       | 388       | 28         | 0.0373534         |
|       | GO:0051493 | regulation of cytoskeleton organization                                 | 323       | 26         | 0.0174580         |
| 6     | GO:0030155 | regulation of cell adhesion                                             | 424       | 34         | 0.0050392         |
|       | GO:0043547 | positive regulation of GTPase activity                                  | 490       | 34         | 0.0328006         |
|       | GO:0007265 | Ras protein signal transduction                                         | 249       | 20         | 0.0366259         |
|       | GO:0001667 | ameboidal-type cell migration                                           | 199       | 19         | 0.0102806         |
|       | GO:0018105 | peptidyl-serine phosphorylation                                         | 197       | 18         | 0.0202218         |
|       | GO:0018209 | peptidyl-serine modification                                            | 207       | 18         | 0.0326384         |
|       | GO:0034329 | cell junction assembly                                                  | 139       | 13         | 0.0393697         |

Table 4: KEGG Pathway analysis. Top 10 per group. Total genes considered: 204

| Group         | KEGG ID                    | Description                                 | Term Size | Gene Count | Adjusted P-value |
|---------------|----------------------------|---------------------------------------------|-----------|------------|------------------|
| 1             | path:hsa04070              | Phosphatidylinositol signaling system       | 85        | 9          | 0.0926317        |
|               | path:hsa00562              | Inositol phosphate metabolism               | 63        | 7          | 0.0964835        |
| 2             | path:hsa03018              | RNA degradation                             | 69        | 7          | 0.1097398        |
| 3             | path:hsa05200              | Pathways in cancer                          | 338       | 16         | 0.4929677        |
|               | path:hsa04144              | Endocytosis                                 | 200       | 14         | 0.1831382        |
|               | path:hsa04919              | Thyroid hormone signaling pathway           | 89        | 13         | 0.0016727        |
|               | path:hsa05166              | Human T-cell leukemia virus 1 infection     | 165       | 12         | 0.1831382        |
|               | path:hsa05206              | MicroRNAs in cancer                         | 168       | 12         | 0.1886212        |
|               | path:hsa05203              | Viral carcinogenesis                        | 147       | 11         | 0.1831382        |
|               | path:hsa05202              | Transcriptional misregulation in cancer     | 104       | 10         | 0.0926317        |
|               | path:hsa05225              | Hepatocellular carcinoma                    | 100       | 10         | 0.0926317        |
|               | path:hsa05165              | Human papillomavirus infection              | 223       | 10         | 0.5742798        |
|               | path:hsa05016              | Huntington disease                          | 134       | 8          | 0.3527942        |
| 4             | path:hsa04024              | cAMP signaling pathway                      | 130       | 12         | 0.0926317        |
|               | path:hsa00310              | Lysine degradation                          | 46        | 9          | 0.0016727        |
|               | path:hsa04114              | Oocyte meiosis                              | 95        | 9          | 0.1006508        |
|               | path:hsa04310              | Wnt signaling pathway                       | 96        | 9          | 0.1010288        |
|               | path:hsa04720              | Long-term potentiation                      | 49        | 8          | 0.0130078        |
|               | path:hsa04921              | Oxytocin signaling pathway                  | 109       | 8          | 0.2405338        |
|               | path:hsa04916              | Melanogenesis                               | 56        | 7          | 0.0926317        |
|               | path:hsa04020              | Calcium signaling pathway                   | 124       | 7          | 0.4040354        |
|               | path:hsa05152              | Tuberculosis                                | 109       | 6          | 0.4262190        |
|               | path:hsa04360              | Axon guidance                               | 127       | 6          | 0.5393572        |
| 5             | path:hsa04120              | Ubiquitin mediated proteolysis              | 122       | 16         | 0.0016727        |
|               | path:hsa04010              | MAPK signaling pathway                      | 196       | 14         | 0.1831382        |
|               | path:hsa04141              | Protein processing in endoplasmic reticulum | 130       | 13         | 0.0525680        |
|               | path:hsa05205              | Proteoglycans in cancer                     | 128       | 13         | 0.0525680        |
|               | path:hsa04810              | Regulation of actin cytoskeleton            | 148       | 11         | 0.1831382        |
|               | path:hsa05163              | Human cytomegalovirus infection             | 154       | 10         | 0.2720810        |
|               | path:hsa03013              | RNA transport                               | 119       | 9          | 0.2034353        |
|               | path:hsa04660              | T cell receptor signaling pathway           | 80        | 8          | 0.1006508        |
|               | path:hsa04015              | Rap1 signaling pathway                      | 137       | 8          | 0.3606783        |
| path:hsa04022 | cGMP-PKG signaling pathway | 107                                         | 7         | 0.2960050  |                  |
| 6             | path:hsa04140              | Autophagy - animal                          | 109       | 10         | 0.1006508        |
|               | path:hsa04714              | Thermogenesis                               | 153       | 9          | 0.3526443        |
|               | path:hsa04915              | Estrogen signaling pathway                  | 78        | 7          | 0.1831382        |
|               | path:hsa04371              | Apelin signaling pathway                    | 95        | 7          | 0.2405338        |
|               | path:hsa04910              | Insulin signaling pathway                   | 101       | 7          | 0.2720810        |
|               | path:hsa04072              | Phospholipase D signaling pathway           | 107       | 7          | 0.2960050        |
|               | path:hsa04014              | Ras signaling pathway                       | 149       | 7          | 0.5409949        |
|               | path:hsa04722              | Neurotrophin signaling pathway              | 87        | 6          | 0.2929396        |
|               | path:hsa04150              | mTOR signaling pathway                      | 104       | 6          | 0.4017740        |
|               | path:hsa04151              | PI3K-Akt signaling pathway                  | 225       | 6          | 0.8841293        |

## Integration Frequency (Enrichment)

Table 5: Table of top 50 genes with the most frequent clonal enrichment.

| Gene      | Num. Patients | TDN Sites | Patient Sites | Onco-Related | Frequency Increase (%) |
|-----------|---------------|-----------|---------------|--------------|------------------------|
| RBM27     | 6             | 0         | 12            | FALSE        | Inf                    |
| AGL       | 4             | 1         | 10            | FALSE        | 1368.7                 |
| MCPH1     | 8             | 2         | 13            | TRUE         | 854.7                  |
| BACH2     | 7             | 2         | 12            | TRUE         | 781.2                  |
| NDFIP2    | 6             | 3         | 17            | FALSE        | 732.3                  |
| GAK       | 8             | 3         | 17            | TRUE         | 732.3                  |
| IKZF2     | 6             | 2         | 11            | TRUE         | 707.8                  |
| GNA12     | 6             | 2         | 11            | TRUE         | 707.8                  |
| FANCL     | 5             | 2         | 11            | FALSE        | 707.8                  |
| PIKFYVE   | 9             | 2         | 11            | FALSE        | 707.8                  |
| PAPOLA    | 6             | 3         | 16            | FALSE        | 683.3                  |
| FAM117B   | 6             | 5         | 25            | FALSE        | 634.4                  |
| CD55      | 9             | 3         | 14            | TRUE         | 585.4                  |
| EP400P1   | 6             | 4         | 18            | FALSE        | 560.9                  |
| FUNDC2    | 6             | 3         | 13            | FALSE        | 536.4                  |
| GPHN      | 8             | 3         | 13            | TRUE         | 536.4                  |
| NDUFV2    | 9             | 3         | 13            | FALSE        | 536.4                  |
| UHRF1BP1  | 8             | 3         | 12            | FALSE        | 487.5                  |
| RAB11FIP2 | 9             | 3         | 12            | FALSE        | 487.5                  |
| TAF2      | 7             | 4         | 16            | FALSE        | 487.5                  |
| PDS5B     | 8             | 4         | 16            | TRUE         | 487.5                  |
| RBM39     | 10            | 5         | 19            | TRUE         | 458.1                  |
| LRPPRC    | 10            | 4         | 15            | FALSE        | 450.8                  |
| TET2      | 5             | 4         | 15            | TRUE         | 450.8                  |
| FUS       | 4             | 3         | 11            | TRUE         | 438.5                  |
| PIP5K1A   | 7             | 3         | 11            | FALSE        | 438.5                  |
| LPXN      | 5             | 3         | 11            | FALSE        | 438.5                  |
| RBMS1     | 7             | 3         | 11            | FALSE        | 438.5                  |
| EEF2      | 8             | 3         | 11            | FALSE        | 438.5                  |
| SLK       | 9             | 4         | 14            | FALSE        | 414.0                  |
| MACROD2   | 7             | 4         | 14            | FALSE        | 414.0                  |
| HSF2      | 8             | 4         | 14            | FALSE        | 414.0                  |
| SIPA1L1   | 6             | 3         | 10            | FALSE        | 389.6                  |
| VPS9D1    | 7             | 3         | 10            | FALSE        | 389.6                  |
| GARS      | 4             | 3         | 10            | FALSE        | 389.6                  |
| NSRP1     | 6             | 3         | 10            | FALSE        | 389.6                  |
| SLBP      | 7             | 3         | 10            | FALSE        | 389.6                  |
| PDCD10    | 8             | 3         | 10            | FALSE        | 389.6                  |
| BZW2      | 6             | 3         | 10            | FALSE        | 389.6                  |
| NAA16     | 6             | 3         | 10            | FALSE        | 389.6                  |
| UBR3      | 5             | 3         | 10            | FALSE        | 389.6                  |
| PELP1     | 11            | 8         | 26            | FALSE        | 377.3                  |
| ZFAND3    | 9             | 4         | 13            | FALSE        | 377.3                  |
| RNF10     | 8             | 5         | 16            | FALSE        | 370.0                  |
| KDM4A     | 8             | 5         | 16            | FALSE        | 370.0                  |
| HELLS     | 9             | 5         | 16            | FALSE        | 370.0                  |
| RASA1     | 7             | 7         | 22            | TRUE         | 361.6                  |
| PCMTD2    | 6             | 4         | 12            | FALSE        | 340.6                  |
| ZNF512    | 9             | 4         | 12            | FALSE        | 340.6                  |
| SYNJ1     | 5             | 4         | 12            | FALSE        | 340.6                  |

## Integration Frequency (Depletion)

Table 6: Table of top 4 genes with the most frequent clonal depletion.

| Gene   | Num. Patients | TDN Sites | Patient Sites | Onco-Related | Frequency Increase (%) |
|--------|---------------|-----------|---------------|--------------|------------------------|
| RNPS1  | 5             | 69        | 16            | FALSE        | -65.9                  |
| EXOC2  | 5             | 34        | 10            | FALSE        | -56.8                  |
| EIF2B3 | 8             | 42        | 14            | FALSE        | -51.0                  |
| MROH1  | 8             | 142       | 71            | FALSE        | -26.6                  |

## Genes with the Most Abundant Clones

Table 7: Table of top 50 Genes containing the highest abundant clones.

| Gene            | Num. Patients | Peak Abundance | Peak Rel. Abund. | Clonal Gini Index | Onco-Related |
|-----------------|---------------|----------------|------------------|-------------------|--------------|
| TET2            | 7             | 814            | 0.989            | 0.920             | TRUE         |
| KCTD3           | 3             | 589            | 0.265            | 0.663             | FALSE        |
| PATL1           | 3             | 578            | 0.260            | 0.745             | FALSE        |
| PIKFYVE         | 8             | 410            | 0.273            | 0.878             | FALSE        |
| SRCAP           | 10            | 373            | 0.357            | 0.896             | FALSE        |
| MTMR3           | 5             | 261            | 0.041            | 0.872             | TRUE         |
| PCNX1           | 10            | 153            | 0.010            | 0.828             | FALSE        |
| PPP6R3          | 11            | 149            | 0.040            | 0.745             | FALSE        |
| SSH2            | 8             | 137            | 0.062            | 0.805             | FALSE        |
| RSRC1           | 7             | 109            | 0.014            | 0.811             | FALSE        |
| SNHG12          | 2             | 96             | 0.057            | 0.646             | FALSE        |
| MAPK14          | 8             | 91             | 0.018            | 0.784             | TRUE         |
| RPA3            | 4             | 87             | 0.011            | 0.767             | FALSE        |
| ZNF573          | 3             | 86             | 0.610            | 0.677             | FALSE        |
| MGA             | 10            | 85             | 0.013            | 0.762             | FALSE        |
| AQR             | 4             | 84             | 0.022            | 0.790             | FALSE        |
| LEF1            | 8             | 84             | 0.038            | 0.770             | TRUE         |
| LINC01473       | 2             | 82             | 0.075            | 0.488             | FALSE        |
| CARD8           | 11            | 79             | 0.056            | 0.700             | TRUE         |
| IQCB1           | 4             | 79             | 0.028            | 0.713             | FALSE        |
| DNAJC13         | 6             | 71             | 0.004            | 0.764             | FALSE        |
| EXOSC10         | 4             | 70             | 0.008            | 0.776             | FALSE        |
| ATP2A2          | 8             | 67             | 0.030            | 0.749             | FALSE        |
| SEC31A          | 6             | 66             | 0.004            | 0.752             | FALSE        |
| GPN1            | 2             | 62             | 0.017            | 0.711             | FALSE        |
| SMAP2           | 6             | 61             | 0.004            | 0.768             | FALSE        |
| TRIO            | 5             | 61             | 0.025            | 0.770             | TRUE         |
| ZZEF1           | 10            | 56             | 0.333            | 0.632             | FALSE        |
| CLK4            | 8             | 53             | 0.036            | 0.653             | FALSE        |
| JMJD6           | 2             | 53             | 0.015            | 0.755             | FALSE        |
| KDM5D           | 5             | 51             | 0.017            | 0.741             | FALSE        |
| UBR1            | 8             | 48             | 0.421            | 0.715             | FALSE        |
| MEMO1           | 4             | 47             | 0.006            | 0.722             | FALSE        |
| PTBP1           | 6             | 47             | 0.043            | 0.680             | TRUE         |
| DYNC1H1         | 6             | 44             | 0.003            | 0.721             | FALSE        |
| NGDN            | 3             | 44             | 0.005            | 0.623             | FALSE        |
| EIF2AK4         | 3             | 43             | 0.003            | 0.659             | FALSE        |
| MSH5-SAPCD1     | 4             | 43             | 0.039            | 0.708             | FALSE        |
| POLG2           | 2             | 43             | 0.003            | 0.708             | FALSE        |
| RASEF           | 1             | 43             | 0.005            | 0.477             | FALSE        |
| UXT-AS1         | 2             | 43             | 0.039            | 0.477             | FALSE        |
| ADD1            | 8             | 42             | 0.006            | 0.605             | FALSE        |
| GRB2            | 10            | 42             | 0.017            | 0.566             | TRUE         |
| KIFC1           | 7             | 42             | 0.003            | 0.694             | FALSE        |
| TAC3            | 2             | 42             | 0.018            | 0.477             | FALSE        |
| ZNF92           | 2             | 42             | 0.003            | 0.690             | FALSE        |
| ACTL6A          | 1             | 40             | 0.003            | 0.000             | FALSE        |
| ATP6V1G2-DDX39B | 8             | 40             | 0.005            | 0.656             | FALSE        |
| PHF12           | 2             | 40             | 0.014            | 0.670             | FALSE        |
| MICAL2          | 1             | 39             | 0.028            | 0.000             | FALSE        |



## Longitudinal Observation

Table 8: Table of top 50 genes identified by longitudinal observations.

| Gene     | Time Span | Longest Time | Obs. Count | Num. Patients | Patient Sites | Peak Abund. | Onco-Related |
|----------|-----------|--------------|------------|---------------|---------------|-------------|--------------|
| FKBP5    | 1555.0    | 1825.0       | 4          | 11            | 30            | 15          | FALSE        |
| PTPRA    | 1555.0    | 1825.0       | 3          | 8             | 33            | 4           | FALSE        |
| TET2     | 1464.0    | 1584.0       | 7          | 5             | 15            | 814         | TRUE         |
| UBR1     | 1277.5    | 1825.0       | 4          | 7             | 13            | 48          | FALSE        |
| COX6B1   | 825.0     | 1095.0       | 3          | 9             | 17            | 5           | FALSE        |
| CCDC57   | 642.5     | 912.5        | 2          | 11            | 33            | 6           | FALSE        |
| KMT5B    | 642.5     | 912.5        | 2          | 10            | 26            | 7           | FALSE        |
| MACF1    | 519.5     | 547.5        | 3          | 12            | 32            | 11          | TRUE         |
| DNMT1    | 365.0     | 912.5        | 2          | 11            | 65            | 13          | TRUE         |
| STXBP5   | 350.0     | 360.0        | 4          | 8             | 15            | 8           | FALSE        |
| CASK     | 346.0     | 547.5        | 2          | 7             | 16            | 5           | FALSE        |
| RPTOR    | 346.0     | 360.0        | 2          | 15            | 85            | 11          | FALSE        |
| DIP2A    | 346.0     | 360.0        | 2          | 10            | 35            | 25          | FALSE        |
| PTBP1    | 346.0     | 360.0        | 2          | 7             | 17            | 47          | TRUE         |
| MIR4745  | 346.0     | 360.0        | 2          | 6             | 10            | 47          | FALSE        |
| ZZEF1    | 332.0     | 360.0        | 5          | 11            | 47            | 56          | FALSE        |
| SRCAP    | 332.0     | 360.0        | 5          | 10            | 21            | 373         | FALSE        |
| OGDH     | 332.0     | 360.0        | 4          | 4             | 10            | 17          | FALSE        |
| WDR82    | 277.5     | 547.5        | 3          | 7             | 20            | 7           | TRUE         |
| PIP5K1A  | 277.5     | 547.5        | 2          | 7             | 11            | 3           | FALSE        |
| EP400P1  | 260.0     | 270.0        | 3          | 6             | 18            | 5           | FALSE        |
| HSF1     | 256.0     | 270.0        | 3          | 12            | 45            | 10          | FALSE        |
| BOP1     | 256.0     | 270.0        | 3          | 11            | 34            | 10          | TRUE         |
| FNBP1    | 256.0     | 270.0        | 2          | 9             | 32            | 5           | TRUE         |
| PDS5B    | 256.0     | 270.0        | 2          | 8             | 16            | 10          | TRUE         |
| ACOX1    | 256.0     | 270.0        | 2          | 7             | 15            | 2           | FALSE        |
| PIK3C3   | 180.0     | 360.0        | 3          | 10            | 30            | 5           | FALSE        |
| IQGAP1   | 166.0     | 180.0        | 3          | 9             | 16            | 5           | FALSE        |
| SNAPC4   | 166.0     | 180.0        | 2          | 7             | 18            | 7           | FALSE        |
| UBE2J2   | 166.0     | 180.0        | 2          | 7             | 14            | 2           | FALSE        |
| SSH2     | 152.0     | 1095.0       | 4          | 8             | 26            | 137         | FALSE        |
| MED13    | 152.0     | 270.0        | 4          | 12            | 26            | 21          | FALSE        |
| CARD8    | 152.0     | 180.0        | 4          | 11            | 38            | 79          | TRUE         |
| LEF1     | 152.0     | 180.0        | 4          | 7             | 15            | 84          | TRUE         |
| VAV1     | 152.0     | 180.0        | 3          | 13            | 76            | 37          | TRUE         |
| STAG1    | 136.0     | 912.5        | 2          | 8             | 13            | 6           | TRUE         |
| PPP6R2   | 136.0     | 180.0        | 2          | 11            | 40            | 15          | FALSE        |
| RTTN     | 136.0     | 150.0        | 2          | 8             | 15            | 6           | FALSE        |
| MAPK8IP3 | 130.0     | 270.0        | 2          | 10            | 31            | 5           | FALSE        |
| SMG1     | 122.0     | 150.0        | 3          | 12            | 39            | 7           | FALSE        |
| INPP4B   | 122.0     | 150.0        | 3          | 11            | 28            | 3           | FALSE        |
| PIAS1    | 122.0     | 150.0        | 3          | 8             | 21            | 6           | FALSE        |
| DDX60    | 122.0     | 150.0        | 3          | 9             | 15            | 22          | FALSE        |
| ZNRD1ASP | 122.0     | 150.0        | 3          | 6             | 14            | 4           | FALSE        |
| DPYD     | 122.0     | 150.0        | 2          | 12            | 33            | 22          | FALSE        |
| RUNX1    | 110.0     | 360.0        | 2          | 9             | 19            | 1           | TRUE         |
| ASH1L    | 106.0     | 1825.0       | 2          | 12            | 46            | 5           | FALSE        |
| WVOX     | 106.0     | 1095.0       | 3          | 5             | 11            | 5           | TRUE         |
| RFX2     | 106.0     | 360.0        | 2          | 7             | 14            | 9           | TRUE         |
| PPFIA1   | 106.0     | 270.0        | 4          | 5             | 11            | 20          | FALSE        |

## Reference Data

The NCBI RefGenes data set was used to identify gene regions (hg38) while genes identified as onco-related were from the Bushman Lab curated list of **onco-related genes**.

Gene Ontologies were extracted from the `GO.db` R-package (v3.4.1). KEGG pathways were acquired via interfacing with the KEGG web-server API through the `KEGGREST` R-package (v1.16.1). Gene lists, including RefSeq genes used for annotation of integration sites, were standardized to HGNC gene symbols (date: 2018-02-07). Groups identified in GO and KEGG analyses were determined from Jaccard distances between identified terms, followed by modularity-optimizing clustering from a weighted-undirected graph using a Louvain algorithm (**Blondel *et al.* 2008**). Terms within groups of GO or KEGG terms have greater overlap of gene lists between themselves than between terms found in other groups. This method was implemented to help reduce the functional redundancy commonly observed in GO and overlapping pathways observed with KEGG.

# Comprehensive Genes of Interest Table

Table 9: Table of all genes identified within analysis.

| Gene     | Chromosome | Start Pos.  | End Pos.    | Patients | Freq. Change (%) | Peak Abund. | Long. Obs. | Criteria |
|----------|------------|-------------|-------------|----------|------------------|-------------|------------|----------|
| VAV1     | chr19      | 6,767,667   | 6,862,366   | 13       | 110.6            | 37          | 152.0      | EAL      |
| RNF157   | chr17      | 76,137,452  | 76,245,311  | 12       | 77.8             | 28          | 14.0       | EAL      |
| AKAP13   | chr15      | 85,375,615  | 85,754,358  | 11       | 340.6            | 27          | 7.0        | EAL      |
| CARD8    | chr19      | 48,203,085  | 48,260,946  | 11       | 74.4             | 79          | 152.0      | EAL      |
| ZZEF1    | chr17      | 3,999,444   | 4,147,959   | 11       | 64.4             | 56          | 332.0      | EAL      |
| CRAMP1   | chr16      | 1,609,639   | 1,682,908   | 10       | 53.1             | 30          | 18.0       | EAL      |
| PAFAH1B1 | chr17      | 2,588,628   | 2,690,615   | 10       | 110.7            | 30          | 7.0        | EAL      |
| SRCAP    | chr16      | 30,694,140  | 30,745,129  | 10       | 137.3            | 373         | 332.0      | EAL      |
| UBAP2L   | chr1       | 154,215,171 | 154,276,510 | 10       | 235.7            | 30          | 7.0        | EAL      |
| ST13     | chr22      | 40,819,534  | 40,862,008  | 8        | 153.7            | 29          | 7.0        | EAL      |
| CLK4     | chr5       | 178,597,663 | 178,632,053 | 7        | 259.0            | 53          | 106.0      | EAL      |
| PTBP1    | chr19      | 792,391     | 817,327     | 7        | 316.1            | 47          | 346.0      | EAL      |
| TET2     | chr4       | 105,140,874 | 105,284,803 | 5        | 450.8            | 814         | 1464.0     | EAL      |
| FANCA    | chr16      | 89,732,550  | 89,821,657  | 15       | 94.3             | 21          | 15.0       | EL       |
| JPT2     | chr16      | 1,673,276   | 1,707,072   | 15       | 106.7            | 23          | 46.0       | EL       |
| RPTOR    | chr17      | 80,539,824  | 80,971,373  | 15       | 75.8             | 11          | 346.0      | EL       |
| PPP3CA   | chr4       | 101,018,429 | 101,352,471 | 14       | 178.3            | 5           | 46.0       | EL       |
| ANKRD11  | chr16      | 89,262,620  | 89,495,561  | 13       | 94.2             | 23          | 7.0        | EL       |
| EHMT1    | chr9       | 137,613,991 | 137,841,126 | 13       | 111.1            | 3           | 50.0       | EL       |
| EP300    | chr22      | 41,087,609  | 41,185,077  | 13       | 159.2            | 6           | 46.0       | EL       |
| LUC7L    | chr16      | 183,968     | 234,482     | 13       | 35.9             | 30          | 7.0        | AL       |
| RABEP1   | chr17      | 5,277,262   | 5,391,339   | 13       | 74.7             | 26          | 14.0       | EA       |
| JMJD1C   | chr10      | 63,162,220  | 63,527,075  | 12       | 273.9            | 5           | 7.0        | EL       |
| MED13    | chr17      | 61,937,604  | 62,070,282  | 12       | 154.6            | 21          | 152.0      | EL       |
| PPP6R3   | chr11      | 68,455,717  | 68,620,333  | 12       | 182.9            | 149         | 14.0       | EA       |
| SMG1P1   | chr16      | 22,432,007  | 22,497,220  | 12       | 225.2            | 3           | 100.0      | EL       |
| CREBBP   | chr16      | 3,720,054   | 3,885,120   | 11       | 83.6             | 5           | 46.0       | EL       |
| GMDS     | chr6       | 1,618,799   | 2,250,634   | 11       | 230.5            | 8           | 14.0       | EL       |
| SF1      | chr11      | 64,759,603  | 64,783,844  | 11       | 84.6             | 16          | 14.0       | EL       |
| SUPT3H   | chr6       | 44,821,729  | 45,383,051  | 11       | 187.4            | 8           | 14.0       | EL       |
| USP15    | chr12      | 62,255,339  | 62,414,721  | 11       | 120.3            | 14          | 15.0       | EL       |
| XPO5     | chr6       | 43,517,329  | 43,581,075  | 11       | 99.3             | 26          | 22.0       | AL       |
| ARHGAP15 | chr2       | 143,124,329 | 143,773,352 | 10       | 120.3            | 7           | 5.0        | EL       |
| CHD4     | chr12      | 6,565,081   | 6,612,433   | 10       | 131.9            | 19          | 7.0        | EL       |
| DDX42    | chr17      | 63,769,188  | 63,824,317  | 10       | 114.7            | 6           | 14.0       | EL       |
| DIP2A    | chr21      | 46,453,948  | 46,575,013  | 10       | 28.5             | 25          | 346.0      | AL       |
| EYA3     | chr1       | 27,965,343  | 28,093,637  | 10       | 235.7            | 7           | 32.0       | EL       |
| KDM6A    | chrX       | 44,868,174  | 45,117,612  | 10       | 181.5            | 9           | 106.0      | EL       |
| LRBA     | chr4       | 150,259,658 | 151,020,497 | 10       | 99.7             | 17          | 106.0      | EL       |
| MGA      | chr15      | 41,655,411  | 41,774,943  | 10       | 148.6            | 85          | 46.0       | EA       |
| NF1      | chr17      | 31,089,926  | 31,382,677  | 10       | 193.7            | 14          | 14.0       | EL       |

Table 9: Table of all genes identified within analysis. (continued)

| Gene     | Chromosome | Start Pos.  | End Pos.    | Patients | Freq. Change (%) | Peak Abund. | Long. Obs. | Criteria |
|----------|------------|-------------|-------------|----------|------------------|-------------|------------|----------|
| PIK3C3   | chr18      | 41,950,197  | 42,086,482  | 10       | 267.2            | 5           | 180.0      | EL       |
| PRKACB   | chr1       | 84,072,974  | 84,243,498  | 10       | 111.1            | 4           | 7.0        | EL       |
| SETD2    | chr3       | 47,011,407  | 47,168,977  | 10       | 100.7            | 17          | 22.0       | EL       |
| SRRM2    | chr16      | 2,747,328   | 2,776,412   | 10       | 183.3            | 32          | 1.0        | EA       |
| DDX60    | chr4       | 168,211,290 | 168,323,807 | 9        | 144.8            | 22          | 122.0      | EL       |
| GRB2     | chr17      | 75,313,075  | 75,410,709  | 9        | 17.5             | 42          | 14.0       | AL       |
| HELLS    | chr10      | 94,540,766  | 94,607,099  | 9        | 370.0            | 15          | 106.0      | EL       |
| MED13L   | chr12      | 115,953,575 | 116,282,186 | 9        | 104.0            | 38          | 7.0        | EA       |
| NDUFV2   | chr18      | 9,097,629   | 9,139,345   | 9        | 536.4            | 15          | 22.0       | EL       |
| PIKFYVE  | chr2       | 208,261,266 | 208,363,751 | 9        | 707.8            | 410         | 14.0       | EA       |
| RUNX1    | chr21      | 34,782,800  | 35,054,298  | 9        | 248.8            | 1           | 110.0      | EL       |
| SLC6A16  | chr19      | 49,284,634  | 49,330,217  | 9        | 82.1             | 2           | 14.0       | EL       |
| SMURF2   | chr17      | 64,539,616  | 64,667,268  | 9        | 100.3            | 27          | 7.0        | AL       |
| TARSL2   | chr15      | 101,648,751 | 101,729,442 | 9        | 340.6            | 22          | 7.0        | EL       |
| UBAC2    | chr13      | 99,195,424  | 99,391,499  | 9        | 120.3            | 4           | 14.0       | EL       |
| UBR4     | chr1       | 19,069,505  | 19,215,252  | 9        | 256.7            | 8           | 7.0        | EL       |
| USP25    | chr21      | 15,725,024  | 15,885,071  | 9        | 218.2            | 10          | 46.0       | EL       |
| AP2B1    | chr17      | 35,582,262  | 35,731,417  | 8        | 144.8            | 13          | 90.0       | EL       |
| ATP2A2   | chr12      | 110,276,226 | 110,356,092 | 8        | 157.0            | 67          | 22.0       | EA       |
| DNAJC13  | chr3       | 132,412,659 | 132,544,032 | 8        | 193.7            | 71          | 7.0        | EA       |
| DYNC1H1  | chr14      | 101,959,527 | 102,055,798 | 8        | 193.7            | 44          | 7.0        | EA       |
| FAM13A   | chr4       | 88,720,953  | 89,062,195  | 8        | 172.8            | 1           | 7.0        | EL       |
| HNRNPUL1 | chr19      | 41,257,475  | 41,312,783  | 8        | 179.1            | 4           | 14.0       | EL       |
| MCPH1    | chr8       | 6,401,591   | 6,653,505   | 8        | 854.7            | 9           | 7.0        | EL       |
| MOB3A    | chr19      | 2,066,035   | 2,101,270   | 8        | 135.0            | 2           | 22.0       | EL       |
| PDCD4    | chr10      | 110,866,794 | 110,905,006 | 8        | 105.6            | 26          | 14.0       | AL       |
| PDS5B    | chr13      | 32,581,426  | 32,783,020  | 8        | 487.5            | 10          | 256.0      | EL       |
| PIAS1    | chr15      | 68,049,178  | 68,196,466  | 8        | 285.5            | 6           | 122.0      | EL       |
| RSRC1    | chr3       | 158,105,051 | 158,549,835 | 8        | 46.9             | 109         | 106.0      | AL       |
| SSH2     | chr17      | 29,620,938  | 29,935,228  | 8        | 27.3             | 137         | 152.0      | AL       |
| STAG1    | chr3       | 136,332,156 | 136,757,403 | 8        | 281.9            | 6           | 136.0      | EL       |
| LEF1     | chr4       | 108,042,544 | 108,173,956 | 7        | 46.9             | 84          | 152.0      | AL       |
| MAPK14   | chr6       | 36,022,676  | 36,116,236  | 7        | 108.1            | 91          | 7.0        | AL       |
| NEMP1    | chr12      | 57,050,642  | 57,083,791  | 7        | 223.1            | 10          | 46.0       | EL       |
| PIP5K1A  | chr1       | 151,193,543 | 151,254,531 | 7        | 438.5            | 3           | 277.5      | EL       |
| UBR1     | chr15      | 42,937,899  | 43,111,088  | 7        | -17.0            | 48          | 1277.5     | AL       |
| BRWD3    | chrX       | 80,664,487  | 80,814,734  | 6        | 172.8            | 6           | 7.0        | EL       |
| EP400P1  | chr12      | 132,079,282 | 132,131,340 | 6        | 560.9            | 5           | 260.0      | EL       |
| HERC4    | chr10      | 67,916,898  | 68,080,346  | 6        | 34.6             | 35          | 106.0      | AL       |
| MIR4745  | chr19      | 799,939     | 810,001     | 6        | 267.2            | 47          | 346.0      | EL       |
| MTOR     | chr1       | 11,101,530  | 11,267,551  | 6        | 55.5             | 29          | 90.0       | AL       |

Table 9: Table of all genes identified within analysis. (continued)

| Gene     | Chromosome | Start Pos.  | End Pos.    | Patients | Freq. Change (%) | Peak Abund. | Long. Obs. | Criteria |
|----------|------------|-------------|-------------|----------|------------------|-------------|------------|----------|
| NDFIP2   | chr13      | 79,476,123  | 79,561,077  | 6        | 732.3            | 8           | 46.0       | EL       |
| PCNT     | chr21      | 46,319,121  | 46,450,769  | 6        | 223.1            | 5           | 4.0        | EL       |
| TRIM33   | chr1       | 114,387,776 | 114,516,160 | 6        | 303.9            | 17          | 106.0      | EL       |
| UBE2L3   | chr22      | 21,544,446  | 21,629,034  | 6        | 193.7            | 3           | 7.0        | EL       |
| ECD      | chr10      | 73,129,523  | 73,173,095  | 5        | 340.6            | 24          | 1.0        | EA       |
| MARF1    | chr16      | 15,589,368  | 15,648,166  | 5        | 212.1            | 17          | 106.0      | EL       |
| PA2G4    | chr12      | 56,099,318  | 56,118,910  | 5        | 130.8            | 38          | 14.0       | AL       |
| PPFIA1   | chr11      | 70,265,699  | 70,389,501  | 5        | 169.3            | 20          | 106.0      | EL       |
| STAG3    | chr7       | 100,172,723 | 100,219,387 | 5        | 169.3            | 35          | 0.0        | EA       |
| EHMT1    | chr9       | 137,758,021 | 137,769,772 | 4        | 144.8            | 1           | 0.0        | EL       |
| KDM2A    | chr11      | 67,114,268  | 67,263,079  | 14       | 14.5             | 7           | 50.0       | L        |
| NPLOC4   | chr17      | 81,551,884  | 81,642,153  | 14       | 4.9              | 16          | 46.0       | L        |
| SARNP    | chr12      | 55,747,462  | 55,822,756  | 14       | 136.6            | 5           | 22.0       | E        |
| SMG1P5   | chr16      | 30,280,017  | 30,340,374  | 14       | 88.2             | 5           | 14.0       | E        |
| TNRC6C   | chr17      | 77,999,236  | 78,113,835  | 14       | 75.2             | 6           | 22.0       | E        |
| CBFB     | chr16      | 67,024,146  | 67,106,055  | 13       | 98.3             | 14          | 22.0       | E        |
| NSD1     | chr5       | 177,128,078 | 177,305,213 | 13       | 12.2             | 6           | 62.0       | L        |
| UTRN     | chr6       | 144,286,736 | 144,858,034 | 13       | 40.5             | 6           | 22.0       | L        |
| VPS8     | chr3       | 184,807,142 | 185,057,614 | 13       | 230.5            | 10          | 46.0       | E        |
| ASH1L    | chr1       | 155,330,260 | 155,567,533 | 12       | 2.4              | 5           | 106.0      | L        |
| DPYD     | chr1       | 97,072,743  | 97,926,059  | 12       | 12.7             | 22          | 122.0      | L        |
| HSF1     | chr8       | 144,286,568 | 144,319,726 | 12       | -13.0            | 10          | 256.0      | L        |
| MACF1    | chr1       | 39,079,166  | 39,492,138  | 12       | 6.8              | 11          | 519.5      | L        |
| PACS1    | chr11      | 66,065,352  | 66,249,747  | 12       | 2.8              | 5           | 46.0       | L        |
| PSMD13   | chr11      | 231,807     | 257,984     | 12       | 77.8             | 18          | 1.0        | E        |
| SAFB     | chr19      | 5,618,034   | 5,673,478   | 12       | 58.2             | 17          | 0.0        | E        |
| SMG1     | chr16      | 18,799,852  | 18,931,404  | 12       | 6.1              | 7           | 122.0      | L        |
| ZNF276   | chr16      | 89,715,367  | 89,745,924  | 12       | 77.5             | 3           | 1.0        | E        |
| BOP1     | chr8       | 144,257,045 | 144,296,438 | 11       | 8.6              | 10          | 256.0      | L        |
| CCDC57   | chr17      | 82,096,469  | 82,217,829  | 11       | -8.6             | 6           | 642.5      | L        |
| DIAPH2   | chrX       | 96,679,662  | 97,605,598  | 11       | 95.8             | 20          | 46.0       | E        |
| DNMT1    | chr19      | 10,128,343  | 10,200,135  | 11       | 4.9              | 13          | 365.0      | L        |
| FKBP5    | chr6       | 35,568,584  | 35,733,583  | 11       | -16.9            | 15          | 1555.0     | L        |
| FOXP1    | chr3       | 70,949,713  | 71,588,989  | 11       | 88.0             | 4           | 14.0       | E        |
| FXR2     | chr17      | 7,586,229   | 7,619,897   | 11       | 86.4             | 12          | 14.0       | E        |
| INPP4B   | chr4       | 142,018,159 | 142,851,535 | 11       | 24.6             | 3           | 122.0      | L        |
| PELP1    | chr17      | 4,666,383   | 4,709,337   | 11       | 377.3            | 3           | 14.0       | E        |
| PPP6R2   | chr22      | 50,338,316  | 50,450,089  | 11       | 8.8              | 15          | 136.0      | L        |
| SEC16A   | chr9       | 136,435,095 | 136,488,759 | 11       | 31.7             | 29          | 46.0       | A        |
| SNORD117 | chr6       | 31,531,373  | 31,541,449  | 11       | 98.7             | 40          | 14.0       | E        |
| TRAPPC10 | chr21      | 44,007,324  | 44,111,551  | 11       | 50.6             | 7           | 14.0       | L        |

Table 9: Table of all genes identified within analysis. (continued)

| Gene      | Chromosome | Start Pos.  | End Pos.    | Patients | Freq. Change (%) | Peak Abund. | Long. Obs. | Criteria |
|-----------|------------|-------------|-------------|----------|------------------|-------------|------------|----------|
| VPS13D    | chr1       | 12,225,038  | 12,517,046  | 11       | 164.4            | 3           | 0.0        | E        |
| ZNF407    | chr18      | 74,625,962  | 75,070,672  | 11       | 218.2            | 3           | 1.0        | E        |
| ATF7IP    | chr12      | 14,360,631  | 14,507,935  | 10       | 66.0             | 8           | 7.0        | L        |
| CBLB      | chr3       | 105,650,460 | 105,874,422 | 10       | 100.3            | 4           | 7.0        | E        |
| CLEC16A   | chr16      | 10,939,487  | 11,187,189  | 10       | 291.7            | 9           | 0.0        | E        |
| CUX1      | chr7       | 101,810,903 | 102,288,958 | 10       | 212.1            | 3           | 0.0        | E        |
| CYTH1     | chr17      | 78,669,046  | 78,787,342  | 10       | 15.4             | 4           | 7.0        | L        |
| DDX10     | chr11      | 108,660,024 | 108,945,930 | 10       | 193.7            | 3           | 14.0       | E        |
| EPB41     | chr1       | 28,882,090  | 29,125,046  | 10       | 140.3            | 7           | 14.0       | E        |
| FCHSD2    | chr11      | 72,831,744  | 73,147,098  | 10       | 72.0             | 5           | 22.0       | E        |
| GBE1      | chr3       | 81,484,698  | 81,766,799  | 10       | 267.2            | 9           | 46.0       | E        |
| GLCC1     | chr7       | 7,963,742   | 8,094,079   | 10       | 64.2             | 4           | 84.0       | L        |
| KLF12     | chr13      | 73,681,011  | 74,138,929  | 10       | 133.7            | 12          | 14.0       | E        |
| KMT5B     | chr11      | 68,149,862  | 68,218,772  | 10       | 41.4             | 7           | 642.5      | L        |
| LRPPRC    | chr2       | 43,881,223  | 44,001,005  | 10       | 450.8            | 7           | 0.0        | E        |
| MAPK8IP3  | chr16      | 1,701,182   | 1,775,317   | 10       | -12.4            | 5           | 130.0      | L        |
| MECP2     | chrX       | 154,016,812 | 154,102,731 | 10       | 36.6             | 12          | 99.0       | L        |
| MGEA5     | chr10      | 101,779,442 | 101,823,465 | 10       | 218.2            | 4           | 0.0        | E        |
| MIR6767   | chr16      | 2,440,391   | 2,450,457   | 10       | 140.3            | 3           | 1.0        | E        |
| NCOA1     | chr2       | 24,579,476  | 24,775,701  | 10       | 40.2             | 3           | 22.0       | L        |
| PBRM1     | chr3       | 52,540,351  | 52,690,850  | 10       | 26.6             | 14          | 7.0        | L        |
| PCNX1     | chr14      | 70,902,404  | 71,120,382  | 10       | 16.3             | 153         | 14.0       | A        |
| PHF14     | chr7       | 10,968,871  | 11,174,623  | 10       | 125.2            | 3           | 7.0        | E        |
| PRPF6     | chr20      | 63,976,077  | 64,038,100  | 10       | 120.3            | 9           | 0.0        | E        |
| RAB11FIP3 | chr16      | 420,667     | 527,481     | 10       | -18.4            | 7           | 46.0       | L        |
| RANBP9    | chr6       | 13,616,497  | 13,716,564  | 10       | 167.0            | 6           | 7.0        | E        |
| RBM39     | chr20      | 35,698,608  | 35,747,336  | 10       | 458.1            | 2           | 14.0       | E        |
| RBM5      | chr3       | 50,083,907  | 50,123,964  | 10       | 135.0            | 10          | 1.0        | E        |
| RNF213    | chr17      | 80,255,860  | 80,403,781  | 10       | 66.5             | 6           | 15.0       | E        |
| SAFB2     | chr19      | 5,581,998   | 5,627,927   | 10       | 40.8             | 13          | 22.0       | L        |
| SIN3A     | chr15      | 75,364,378  | 75,460,783  | 10       | 124.6            | 6           | 0.0        | E        |
| SMARCC1   | chr3       | 47,580,887  | 47,786,915  | 10       | 34.4             | 3           | 7.0        | L        |
| SMG6      | chr17      | 2,054,838   | 2,308,775   | 10       | 25.9             | 16          | 7.0        | L        |
| SUPT5H    | chr19      | 39,440,545  | 39,481,668  | 10       | 157.0            | 3           | 0.0        | E        |
| VPS13B    | chr8       | 99,008,265  | 99,882,586  | 10       | 67.9             | 5           | 0.0        | E        |
| XPO6      | chr16      | 28,092,975  | 28,216,918  | 10       | 146.7            | 2           | 7.0        | E        |
| ZGPAT     | chr20      | 63,702,441  | 63,741,142  | 10       | -17.6            | 5           | 7.0        | L        |
| ZNF251    | chr8       | 144,715,908 | 144,760,585 | 10       | 17.0             | 21          | 22.0       | L        |
| AKAP8L    | chr19      | 15,375,047  | 15,424,121  | 9        | 157.0            | 3           | 0.0        | E        |
| AP3B1     | chr5       | 77,997,325  | 78,299,755  | 9        | 157.0            | 3           | 0.0        | E        |
| CD55      | chr1       | 207,316,471 | 207,365,966 | 9        | 585.4            | 4           | 0.0        | E        |

Table 9: Table of all genes identified within analysis. (*continued*)

| Gene         | Chromosome | Start Pos.  | End Pos.    | Patients | Freq. Change (%) | Peak Abund. | Long. Obs. | Criteria |
|--------------|------------|-------------|-------------|----------|------------------|-------------|------------|----------|
| CHD2         | chr15      | 92,895,320  | 93,033,007  | 9        | 109.8            | 7           | 0.0        | E        |
| COX6B1       | chr19      | 35,643,222  | 35,663,784  | 9        | 56.1             | 5           | 825.0      | L        |
| CPEB2        | chr4       | 14,997,673  | 15,075,153  | 9        | 242.7            | 14          | 22.0       | E        |
| CSNK1D       | chr17      | 82,237,660  | 82,278,742  | 9        | 22.4             | 8           | 7.0        | L        |
| DENND1B      | chr1       | 197,499,748 | 197,780,493 | 9        | 10.2             | 3           | 7.0        | L        |
| DIP2B        | chr12      | 50,499,984  | 50,753,667  | 9        | 55.0             | 4           | 7.0        | L        |
| DLG1         | chr3       | 197,037,559 | 197,304,272 | 9        | 58.6             | 8           | 7.0        | L        |
| EIF4G3       | chr1       | 20,801,291  | 21,181,888  | 9        | 102.8            | 3           | 0.0        | E        |
| ELP4         | chr11      | 31,504,728  | 31,789,525  | 9        | 140.3            | 4           | 0.0        | E        |
| FNBP1        | chr9       | 129,882,186 | 130,048,194 | 9        | 23.7             | 5           | 256.0      | L        |
| FOXJ3        | chr1       | 42,171,538  | 42,340,877  | 9        | 92.8             | 12          | 7.0        | L        |
| FRYL         | chr4       | 48,492,362  | 48,785,299  | 9        | 77.8             | 24          | 14.0       | A        |
| GANAB        | chr11      | 62,619,825  | 62,651,726  | 9        | 66.0             | 6           | 7.0        | L        |
| GTF2I        | chr7       | 74,652,664  | 74,765,692  | 9        | 193.7            | 7           | 0.0        | E        |
| HERC1        | chr15      | 63,603,617  | 63,838,948  | 9        | 132.5            | 4           | 1.0        | E        |
| HNRNPUL2     | chr11      | 62,707,624  | 62,732,385  | 9        | 36.0             | 9           | 76.0       | L        |
| IL4I1        | chr19      | 49,884,655  | 49,934,539  | 9        | -4.5             | 5           | 46.0       | L        |
| IQGAP1       | chr15      | 90,383,240  | 90,507,243  | 9        | 6.8              | 5           | 166.0      | L        |
| KIAA1468     | chr18      | 62,182,290  | 62,312,122  | 9        | 86.0             | 17          | 46.0       | L        |
| LOC101926943 | chr7       | 74,683,936  | 74,733,918  | 9        | 193.7            | 7           | 0.0        | E        |
| LOC101929095 | chr4       | 14,999,941  | 15,432,914  | 9        | 235.7            | 14          | 22.0       | E        |
| MARK3        | chr14      | 103,380,363 | 103,508,829 | 9        | 80.3             | 15          | 14.0       | E        |
| NBEAL1       | chr2       | 203,009,878 | 203,222,994 | 9        | 151.8            | 11          | 14.0       | L        |
| NOSIP        | chr19      | 49,550,467  | 49,585,572  | 9        | -35.7            | 29          | 0.0        | A        |
| NUP214       | chr9       | 131,120,560 | 131,239,670 | 9        | 64.2             | 8           | 106.0      | L        |
| PAN3         | chr13      | 28,133,505  | 28,300,338  | 9        | 127.0            | 8           | 14.0       | E        |
| PARP8        | chr5       | 50,660,898  | 50,851,522  | 9        | 18.6             | 4           | 14.0       | L        |
| PLEKHA5      | chr12      | 19,124,691  | 19,381,399  | 9        | 76.2             | 2           | 7.0        | L        |
| POLA2        | chr11      | 65,256,851  | 65,303,685  | 9        | 25.9             | 9           | 7.0        | L        |
| POT1         | chr7       | 124,817,385 | 124,934,983 | 9        | 66.5             | 26          | 0.0        | A        |
| PUM1         | chr1       | 30,926,505  | 31,070,717  | 9        | 298.7            | 5           | 0.0        | E        |
| RAB11FIP2    | chr10      | 117,999,915 | 118,051,884 | 9        | 487.5            | 19          | 1.0        | E        |
| COP1         | chr1       | 175,939,825 | 176,212,244 | 9        | 172.8            | 3           | 14.0       | E        |
| RNF216       | chr7       | 5,615,040   | 5,786,730   | 9        | -11.9            | 15          | 106.0      | L        |
| SENP6        | chr6       | 75,596,508  | 75,723,285  | 9        | 101.9            | 3           | 0.0        | E        |
| MTREX        | chr5       | 55,302,747  | 55,430,581  | 9        | 212.1            | 6           | 0.0        | E        |
| SLK          | chr10      | 103,962,184 | 104,034,233 | 9        | 414.0            | 13          | 1.0        | E        |
| SMCHD1       | chr18      | 2,650,886   | 2,810,017   | 9        | 0.5              | 4           | 7.0        | L        |
| SYNRG        | chr17      | 37,509,796  | 37,614,438  | 9        | 120.3            | 10          | 46.0       | E        |
| TCF20        | chr22      | 42,155,012  | 42,288,927  | 9        | 46.9             | 10          | 7.0        | L        |
| TRAPPC8      | chr18      | 31,824,172  | 31,948,128  | 9        | 83.6             | 4           | 7.0        | L        |



Table 9: Table of all genes identified within analysis. (*continued*)

| Gene     | Chromosome | Start Pos.  | End Pos.    | Patients | Freq. Change (%) | Peak Abund. | Long. Obs. | Criteria |
|----------|------------|-------------|-------------|----------|------------------|-------------|------------|----------|
| TRPC4AP  | chr20      | 34,997,403  | 35,097,815  | 9        | 212.1            | 3           | 0.0        | E        |
| UBE2I    | chr16      | 1,304,152   | 1,332,018   | 9        | 120.3            | 4           | 50.0       | E        |
| VPS52    | chr6       | 33,245,271  | 33,276,965  | 9        | 53.5             | 10          | 106.0      | L        |
| VPS53    | chr17      | 503,667     | 719,856     | 9        | 226.4            | 6           | 0.0        | E        |
| ZCCHC7   | chr9       | 37,115,471  | 37,363,148  | 9        | 148.6            | 7           | 46.0       | E        |
| ZFAND3   | chr6       | 37,814,530  | 38,159,623  | 9        | 377.3            | 5           | 46.0       | E        |
| ZMYM4    | chr1       | 35,263,966  | 35,426,944  | 9        | 157.0            | 3           | 0.0        | E        |
| ZNF512   | chr2       | 27,577,968  | 27,628,215  | 9        | 340.6            | 2           | 0.0        | E        |
| ZNF609   | chr15      | 64,494,419  | 64,691,067  | 9        | 193.7            | 6           | 0.0        | E        |
| ABCD2    | chr12      | 39,546,219  | 39,625,041  | 8        | 267.2            | 8           | 14.0       | E        |
| ACSF3    | chr16      | 89,088,808  | 89,160,846  | 8        | 115.4            | 4           | 0.0        | E        |
| ADD1     | chr4       | 2,838,856   | 2,935,075   | 8        | 41.2             | 42          | 7.0        | A        |
| ANKHD1   | chr5       | 140,396,813 | 140,544,856 | 8        | 125.2            | 6           | 7.0        | E        |
| ARID4B   | chr1       | 235,161,894 | 235,333,219 | 8        | 167.0            | 6           | 0.0        | E        |
| ARIH1    | chr15      | 72,469,325  | 72,591,555  | 8        | 128.5            | 5           | 7.0        | L        |
| ASXL2    | chr2       | 25,728,752  | 25,883,516  | 8        | -9.1             | 3           | 7.0        | L        |
| ATG5     | chr6       | 106,179,476 | 106,330,820 | 8        | 340.6            | 2           | 0.0        | E        |
| BRWD1    | chr21      | 39,180,477  | 39,318,786  | 8        | 153.7            | 4           | 14.0       | E        |
| CAMK2D   | chr4       | 113,446,031 | 113,766,927 | 8        | 54.2             | 9           | 106.0      | L        |
| CAMK4    | chr5       | 111,218,652 | 111,499,884 | 8        | 56.1             | 9           | 7.0        | L        |
| CDKAL1   | chr6       | 20,529,456  | 21,237,403  | 8        | 31.4             | 5           | 106.0      | L        |
| CHAF1A   | chr19      | 4,397,662   | 4,448,397   | 8        | 89.7             | 7           | 7.0        | E        |
| CHD3     | chr17      | 7,879,804   | 7,917,757   | 8        | 179.1            | 3           | 0.0        | E        |
| CLTC     | chr17      | 59,614,688  | 59,701,956  | 8        | 161.1            | 3           | 1.0        | E        |
| DAP3     | chr1       | 155,684,090 | 155,744,009 | 8        | 252.5            | 2           | 0.0        | E        |
| DAZAP1   | chr19      | 1,402,568   | 1,440,687   | 8        | 34.6             | 2           | 4.0        | L        |
| EED      | chr11      | 86,239,383  | 86,283,810  | 8        | 311.2            | 6           | 14.0       | E        |
| EEF2     | chr19      | 3,971,055   | 3,990,463   | 8        | 438.5            | 3           | 0.0        | E        |
| ERC1     | chr12      | 986,207     | 1,500,933   | 8        | 64.2             | 4           | 7.0        | L        |
| FOCAD    | chr9       | 20,653,308  | 21,000,955  | 8        | 285.5            | 17          | 7.0        | E        |
| GAK      | chr4       | 844,274     | 937,390     | 8        | 732.3            | 4           | 14.0       | E        |
| GCN1     | chr12      | 120,122,209 | 120,199,710 | 8        | 144.8            | 3           | 1.0        | E        |
| GIGYF2   | chr2       | 232,692,304 | 232,865,577 | 8        | 214.7            | 2           | 0.0        | E        |
| GPHN     | chr14      | 66,502,406  | 67,186,808  | 8        | 536.4            | 2           | 0.0        | E        |
| HNRNPR   | chr1       | 23,299,689  | 23,349,364  | 8        | 235.7            | 7           | 46.0       | E        |
| HSF2     | chr6       | 122,394,550 | 122,438,119 | 8        | 414.0            | 15          | 14.0       | E        |
| KDM4A    | chr1       | 43,645,125  | 43,710,518  | 8        | 370.0            | 7           | 0.0        | E        |
| KIAA1109 | chr4       | 122,165,602 | 122,367,759 | 8        | 120.3            | 19          | 1.0        | E        |
| KMT2C    | chr7       | 152,129,924 | 152,441,005 | 8        | 15.4             | 4           | 7.0        | L        |
| KMT2E    | chr7       | 105,009,189 | 105,119,085 | 8        | 140.3            | 3           | 0.0        | E        |
| LCOR     | chr10      | 96,827,259  | 96,991,212  | 8        | 115.4            | 4           | 0.0        | E        |

Table 9: Table of all genes identified within analysis. (continued)

| Gene     | Chromosome | Start Pos.  | End Pos.    | Patients | Freq. Change (%) | Peak Abund. | Long. Obs. | Criteria |
|----------|------------|-------------|-------------|----------|------------------|-------------|------------|----------|
| MIR5096  | chr17      | 4,136,088   | 4,245,637   | 8        | -20.3            | 9           | 14.0       | L        |
| MROH1    | chr8       | 144,143,015 | 144,266,940 | 8        | -26.6            | 5           | 46.0       | DL       |
| MUM1     | chr19      | 1,349,976   | 1,383,431   | 8        | 11.9             | 4           | 90.0       | L        |
| NAA35    | chr9       | 85,936,141  | 86,030,462  | 8        | 267.2            | 8           | 1.0        | E        |
| NCOA3    | chr20      | 47,496,856  | 47,661,877  | 8        | 54.2             | 6           | 7.0        | L        |
| NEAT1    | chr11      | 65,417,797  | 65,450,538  | 8        | 46.9             | 4           | 22.0       | L        |
| NELL2    | chr12      | 44,503,274  | 44,918,928  | 8        | 81.4             | 2           | 4.0        | L        |
| PCM1     | chr8       | 17,917,856  | 18,034,948  | 8        | 107.3            | 11          | 14.0       | E        |
| PDCD10   | chr3       | 167,678,905 | 167,739,863 | 8        | 389.6            | 4           | 0.0        | E        |
| PDLIM5   | chr4       | 94,446,856  | 94,673,227  | 8        | 252.5            | 3           | 4.0        | E        |
| PHF20L1  | chr8       | 132,770,357 | 132,853,807 | 8        | 105.6            | 4           | 22.0       | L        |
| PLEC     | chr8       | 143,910,146 | 143,981,745 | 8        | -24.6            | 11          | 22.0       | L        |
| POGZ     | chr1       | 151,397,723 | 151,464,465 | 8        | 130.8            | 26          | 0.0        | A        |
| PIIP5K2  | chr5       | 103,115,247 | 103,209,911 | 8        | 172.8            | 3           | 0.0        | E        |
| PTPRA    | chr20      | 2,859,194   | 3,043,669   | 8        | 67.1             | 4           | 1555.0     | L        |
| RASA2    | chr3       | 141,482,046 | 141,620,363 | 8        | 115.4            | 7           | 14.0       | E        |
| RNF10    | chr12      | 120,529,328 | 120,582,594 | 8        | 370.0            | 7           | 1.0        | E        |
| RRN3P2   | chr16      | 29,069,841  | 29,121,717  | 8        | 144.8            | 2           | 4.0        | E        |
| RTTN     | chr18      | 69,998,805  | 70,210,726  | 8        | 37.7             | 6           | 136.0      | L        |
| SACM1L   | chr3       | 45,684,240  | 45,750,425  | 8        | 340.6            | 11          | 0.0        | E        |
| SEC24A   | chr5       | 134,643,784 | 134,732,911 | 8        | 193.7            | 1           | 0.0        | E        |
| SLX4IP   | chr20      | 10,430,302  | 10,633,034  | 8        | 151.8            | 3           | 7.0        | L        |
| SRP68    | chr17      | 76,033,774  | 76,077,526  | 8        | 115.4            | 12          | 0.0        | E        |
| STIM2    | chr4       | 26,855,690  | 27,030,381  | 8        | 132.5            | 2           | 4.0        | E        |
| STRN3    | chr14      | 30,888,798  | 31,031,401  | 8        | 169.3            | 3           | 7.0        | E        |
| STXBP5   | chr6       | 147,199,357 | 147,395,476 | 8        | 37.7             | 8           | 350.0      | L        |
| SYMPK    | chr19      | 45,810,441  | 45,868,290  | 8        | 193.7            | 3           | 1.0        | E        |
| TANC2    | chr17      | 63,004,536  | 63,432,706  | 8        | 340.6            | 11          | 7.0        | E        |
| TONSL    | chr8       | 144,423,779 | 144,449,429 | 8        | 2.2              | 7           | 7.0        | L        |
| TOP1     | chr20      | 41,023,817  | 41,129,486  | 8        | 242.7            | 2           | 0.0        | E        |
| UHRF1BP1 | chr6       | 34,787,016  | 34,882,514  | 8        | 487.5            | 4           | 0.0        | E        |
| URI1     | chr19      | 29,918,643  | 30,021,612  | 8        | 193.7            | 6           | 1.0        | E        |
| VAV3     | chr1       | 107,566,159 | 107,969,923 | 8        | 135.0            | 1           | 0.0        | E        |
| VMP1     | chr17      | 59,702,464  | 59,847,255  | 8        | 46.9             | 28          | 46.0       | A        |
| YLPM1    | chr14      | 74,758,365  | 74,842,310  | 8        | 214.7            | 19          | 14.0       | E        |
| YWHAE    | chr17      | 1,339,539   | 1,405,262   | 8        | 340.6            | 2           | 0.0        | E        |
| ZC3H13   | chr13      | 45,949,464  | 46,057,778  | 8        | 311.2            | 6           | 46.0       | E        |
| ZFC3H1   | chr12      | 71,604,600  | 71,668,969  | 8        | 340.6            | 4           | 0.0        | E        |
| ZNF148   | chr3       | 125,220,668 | 125,380,354 | 8        | 153.7            | 6           | 7.0        | E        |
| ACOX1    | chr17      | 75,936,510  | 75,984,434  | 7        | 4.9              | 2           | 256.0      | L        |
| ASCC3    | chr6       | 100,503,194 | 100,886,372 | 7        | 327.3            | 4           | 7.0        | E        |

Table 9: Table of all genes identified within analysis. (continued)

| Gene     | Chromosome | Start Pos.  | End Pos.    | Patients | Freq. Change (%) | Peak Abund. | Long. Obs. | Criteria |
|----------|------------|-------------|-------------|----------|------------------|-------------|------------|----------|
| ATF7     | chr12      | 53,502,855  | 53,631,415  | 7        | 69.5             | 32          | 1.0        | A        |
| ATP8A1   | chr4       | 42,403,374  | 42,662,105  | 7        | 80.8             | 4           | 14.0       | L        |
| BACH2    | chr6       | 89,921,527  | 90,301,908  | 7        | 781.2            | 2           | 0.0        | E        |
| C6orf106 | chr6       | 34,582,279  | 34,701,850  | 7        | 46.9             | 3           | 46.0       | L        |
| CASK     | chrX       | 41,509,935  | 41,928,034  | 7        | 95.8             | 5           | 346.0      | L        |
| CCDC47   | chr17      | 63,740,249  | 63,778,728  | 7        | -13.6            | 6           | 22.0       | L        |
| CDC73    | chr1       | 193,116,957 | 193,259,812 | 7        | 237.8            | 19          | 7.0        | E        |
| CHD8     | chr14      | 21,380,193  | 21,442,298  | 7        | 223.1            | 16          | 14.0       | E        |
| CLEC2D   | chr12      | 9,664,707   | 9,704,555   | 7        | 214.7            | 6           | 1.0        | E        |
| COG5     | chr7       | 107,196,743 | 107,569,514 | 7        | 256.7            | 7           | 46.0       | E        |
| CSNK2A1  | chr20      | 477,693     | 548,838     | 7        | 135.0            | 7           | 0.0        | E        |
| DEPDC5   | chr22      | 31,748,950  | 31,912,034  | 7        | 223.1            | 4           | 0.0        | E        |
| DNAJC5   | chr20      | 63,890,101  | 63,941,031  | 7        | 120.3            | 2           | 7.0        | E        |
| FRG1BP   | chr20      | 30,372,163  | 30,424,842  | 7        | 340.6            | 4           | 7.0        | E        |
| GATAD2B  | chr1       | 153,799,906 | 153,927,975 | 7        | 61.6             | 2           | 7.0        | L        |
| GMCL1    | chr2       | 69,824,605  | 69,886,395  | 7        | 311.2            | 4           | 0.0        | E        |
| HTT      | chr4       | 3,069,680   | 3,248,960   | 7        | 46.9             | 25          | 1.0        | A        |
| KDM7A    | chr7       | 140,079,745 | 140,181,941 | 7        | 242.7            | 5           | 7.0        | E        |
| KLRG1    | chr12      | 8,945,043   | 9,015,744   | 7        | -10.2            | 3           | 7.0        | L        |
| LSM2     | chr6       | 31,792,391  | 31,811,984  | 7        | -29.3            | 2           | 14.0       | L        |
| MACROD2  | chr20      | 13,990,499  | 16,058,196  | 7        | 414.0            | 1           | 0.0        | E        |
| MAN1B1   | chr9       | 137,081,926 | 137,114,187 | 7        | 83.6             | 20          | 5.0        | E        |
| MAP4K3   | chr2       | 39,244,265  | 39,442,312  | 7        | 46.9             | 15          | 46.0       | L        |
| MATR3    | chr5       | 139,268,751 | 139,336,677 | 7        | 212.1            | 6           | 1.0        | E        |
| MIA2     | chr14      | 39,228,909  | 39,356,193  | 7        | 161.1            | 10          | 7.0        | E        |
| NAA15    | chr4       | 139,296,466 | 139,395,781 | 7        | 212.1            | 11          | 0.0        | E        |
| NAA38    | chr17      | 7,851,680   | 7,890,388   | 7        | -0.9             | 15          | 14.0       | L        |
| NBAS     | chr2       | 15,161,907  | 15,566,348  | 7        | 22.4             | 4           | 106.0      | L        |
| NUMA1    | chr11      | 71,997,863  | 72,085,693  | 7        | 135.0            | 3           | 0.0        | E        |
| NUP62    | chr19      | 49,901,825  | 49,934,731  | 7        | -12.8            | 5           | 46.0       | L        |
| NUP88    | chr17      | 5,379,832   | 5,424,739   | 7        | 129.5            | 4           | 0.0        | E        |
| PAPD4    | chr5       | 79,607,419  | 79,691,648  | 7        | 281.9            | 2           | 0.0        | E        |
| PHF3     | chr6       | 63,630,801  | 63,720,522  | 7        | 144.8            | 7           | 4.0        | E        |
| PMS2P1   | chr7       | 100,315,639 | 100,341,307 | 7        | 193.7            | 10          | 0.0        | E        |
| PPP1R16A | chr8       | 144,472,981 | 144,507,121 | 7        | 35.6             | 4           | 7.0        | L        |
| PPP4R2   | chr3       | 72,991,742  | 73,074,201  | 7        | 303.9            | 2           | 7.0        | E        |
| PRKCA    | chr17      | 66,297,807  | 66,815,744  | 7        | 128.5            | 7           | 7.0        | L        |
| PRKN     | chr6       | 161,342,557 | 162,732,802 | 7        | 303.9            | 3           | 0.0        | E        |
| PRPSAP1  | chr17      | 76,305,735  | 76,359,149  | 7        | 149.7            | 2           | 46.0       | E        |
| RAD51B   | chr14      | 67,814,778  | 68,688,106  | 7        | 46.9             | 2           | 22.0       | L        |
| RASA1    | chr5       | 87,263,252  | 87,396,926  | 7        | 361.6            | 3           | 0.0        | E        |

Table 9: Table of all genes identified within analysis. (*continued*)

| Gene         | Chromosome | Start Pos.  | End Pos.    | Patients | Freq. Change (%) | Peak Abund. | Long. Obs. | Criteria |
|--------------|------------|-------------|-------------|----------|------------------|-------------|------------|----------|
| RBMS1        | chr2       | 160,267,150 | 160,498,807 | 7        | 438.5            | 5           | 1.0        | E        |
| RFX2         | chr19      | 5,988,163   | 6,115,653   | 7        | 71.3             | 9           | 106.0      | L        |
| ROCK1        | chr18      | 20,944,741  | 21,116,851  | 7        | 105.6            | 13          | 14.0       | E        |
| RUNX2        | chr6       | 45,323,316  | 45,556,082  | 7        | 248.8            | 8           | 14.0       | E        |
| SENP3-EIF4A1 | chr17      | 7,556,991   | 7,584,006   | 7        | 157.0            | 5           | 46.0       | E        |
| SEPT7        | chr7       | 35,795,985  | 35,912,105  | 7        | 316.1            | 10          | 7.0        | E        |
| SLBP         | chr4       | 1,687,730   | 1,717,741   | 7        | 389.6            | 2           | 0.0        | E        |
| SMAD2        | chr18      | 47,828,094  | 47,936,146  | 7        | 172.8            | 7           | 0.0        | E        |
| SNAPC4       | chr9       | 136,370,568 | 136,403,437 | 7        | 103.4            | 7           | 166.0      | L        |
| SNTB1        | chr8       | 120,530,744 | 120,817,069 | 7        | 172.8            | 3           | 4.0        | E        |
| SPEN         | chr1       | 15,842,863  | 15,945,455  | 7        | 58.2             | 2           | 7.0        | L        |
| SPG7         | chr16      | 89,503,387  | 89,562,768  | 7        | 7.7              | 10          | 7.0        | L        |
| SYNE1        | chr6       | 152,116,683 | 152,642,399 | 7        | 46.9             | 22          | 46.0       | L        |
| SYNE2        | chr14      | 63,847,964  | 64,231,451  | 7        | 69.5             | 8           | 22.0       | L        |
| TAF2         | chr8       | 119,725,773 | 119,837,834 | 7        | 487.5            | 8           | 1.0        | E        |
| THEMIS       | chr6       | 127,703,193 | 127,923,631 | 7        | -2.1             | 5           | 106.0      | L        |
| TTC21B       | chr2       | 165,868,361 | 165,958,838 | 7        | 36.4             | 5           | 46.0       | L        |
| UBE2J2       | chr1       | 1,248,911   | 1,278,854   | 7        | -37.7            | 2           | 166.0      | L        |
| UBE3A        | chr15      | 25,332,248  | 25,444,028  | 7        | 149.7            | 10          | 0.0        | E        |
| UBR5         | chr8       | 102,247,273 | 102,417,689 | 7        | 95.8             | 19          | 7.0        | L        |
| VPS9D1       | chr16      | 89,702,132  | 89,725,986  | 7        | 389.6            | 5           | 0.0        | E        |
| VRK3         | chr19      | 49,971,466  | 50,030,548  | 7        | -13.9            | 2           | 7.0        | L        |
| WDR82        | chr3       | 52,249,421  | 52,283,643  | 7        | 33.5             | 7           | 277.5      | L        |
| YTHDF3       | chr8       | 63,163,552  | 63,217,788  | 7        | 63.2             | 13          | 7.0        | L        |
| ZNF81        | chrX       | 47,831,901  | 47,927,256  | 7        | 175.4            | 7           | 7.0        | E        |
| ZNRF2        | chr7       | 30,279,306  | 30,372,692  | 7        | 144.8            | 3           | 14.0       | E        |
| ANXA1        | chr9       | 73,146,730  | 73,175,394  | 6        | 144.8            | 5           | 14.0       | L        |
| ARHGEF6      | chrX       | 136,660,550 | 136,786,344 | 6        | 193.7            | 5           | 7.0        | E        |
| ATE1         | chr10      | 121,735,420 | 121,933,801 | 6        | 267.2            | 14          | 46.0       | E        |
| ATP9B        | chr18      | 79,064,274  | 79,383,282  | 6        | 79.5             | 2           | 7.0        | L        |
| BAG6         | chr6       | 31,634,027  | 31,657,700  | 6        | 22.4             | 36          | 46.0       | A        |
| BCAS3        | chr17      | 60,672,774  | 61,397,838  | 6        | -36.1            | 2           | 7.0        | L        |
| BCKDHB       | chr6       | 80,101,609  | 80,351,270  | 6        | 267.2            | 3           | 0.0        | E        |
| BIRC6        | chr2       | 32,352,027  | 32,623,898  | 6        | 311.2            | 3           | 0.0        | E        |
| BUB1B        | chr15      | 40,156,008  | 40,226,136  | 6        | 267.2            | 7           | 14.0       | E        |
| BZW2         | chr7       | 16,641,133  | 16,711,523  | 6        | 389.6            | 6           | 0.0        | E        |
| CD96         | chr3       | 111,537,078 | 111,670,991 | 6        | 252.5            | 6           | 0.0        | E        |
| CHD1         | chr5       | 98,850,203  | 98,931,534  | 6        | 277.7            | 8           | 1.0        | E        |
| CHMP2B       | chr3       | 87,222,262  | 87,260,548  | 6        | 88.8             | 24          | 7.0        | A        |
| CLASP2       | chr3       | 33,491,245  | 33,723,213  | 6        | 138.7            | 5           | 7.0        | L        |
| CUL3         | chr2       | 224,465,149 | 224,590,397 | 6        | 252.5            | 8           | 22.0       | E        |

Table 9: Table of all genes identified within analysis. (continued)

| Gene       | Chromosome | Start Pos.  | End Pos.    | Patients | Freq. Change (%) | Peak Abund. | Long. Obs. | Criteria |
|------------|------------|-------------|-------------|----------|------------------|-------------|------------|----------|
| DERL2      | chr17      | 5,466,250   | 5,491,230   | 6        | 135.0            | 37          | 0.0        | A        |
| DNAJC1     | chr10      | 21,751,547  | 22,008,721  | 6        | 17.5             | 38          | 7.0        | A        |
| DOT1L      | chr19      | 2,159,148   | 2,237,578   | 6        | 23.7             | 6           | 14.0       | L        |
| ERGIC2     | chr12      | 29,335,645  | 29,386,210  | 6        | 169.3            | 3           | 0.0        | E        |
| FAM117B    | chr2       | 202,630,177 | 202,774,757 | 6        | 634.4            | 6           | 14.0       | E        |
| FUNDC2     | chrX       | 155,021,788 | 155,061,916 | 6        | 536.4            | 9           | 46.0       | E        |
| GNA12      | chr7       | 2,723,105   | 2,849,325   | 6        | 707.8            | 2           | 0.0        | E        |
| GTDC1      | chr2       | 143,941,013 | 144,337,534 | 6        | 256.7            | 9           | 7.0        | E        |
| IKZF2      | chr2       | 212,994,685 | 213,156,609 | 6        | 707.8            | 1           | 0.0        | E        |
| MED12L     | chr3       | 151,081,797 | 151,441,677 | 6        | 169.3            | 7           | 7.0        | E        |
| MIR5096    | chr1       | 15,866,148  | 15,910,467  | 6        | 79.5             | 2           | 7.0        | L        |
| MIR5096    | chr22      | 37,663,025  | 38,029,093  | 6        | 12.3             | 6           | 7.0        | L        |
| MMP23A     | chr1       | 1,627,779   | 1,706,808   | 6        | 58.2             | 17          | 14.0       | L        |
| NAA16      | chr13      | 41,306,204  | 41,382,030  | 6        | 389.6            | 2           | 1.0        | E        |
| NFKBIL1    | chr6       | 31,541,850  | 31,563,829  | 6        | -19.5            | 4           | 7.0        | L        |
| NSRP1      | chr17      | 30,111,806  | 30,191,475  | 6        | 389.6            | 2           | 0.0        | E        |
| NUCB1      | chr19      | 48,895,049  | 48,928,283  | 6        | 303.9            | 2           | 0.0        | E        |
| NUCB1-AS1  | chr19      | 48,905,929  | 48,923,891  | 6        | 303.9            | 2           | 0.0        | E        |
| OPRM1      | chr6       | 154,005,495 | 154,251,867 | 6        | 46.9             | 3           | 14.0       | L        |
| PAPOLA     | chr14      | 96,497,375  | 96,572,116  | 6        | 683.3            | 3           | 0.0        | E        |
| PCMTD2     | chr20      | 64,250,694  | 64,281,226  | 6        | 340.6            | 17          | 1.0        | E        |
| PDE12      | chr3       | 57,551,246  | 57,661,480  | 6        | 303.9            | 3           | 0.0        | E        |
| PHACTR4    | chr1       | 28,364,581  | 28,505,369  | 6        | 1.0              | 3           | 22.0       | L        |
| RAB28      | chr4       | 13,362,722  | 13,489,365  | 6        | 172.8            | 12          | 0.0        | E        |
| RBM27      | chr5       | 146,198,599 | 146,294,221 | 6        | Inf              | 3           | 0.0        | E        |
| RIPOR2     | chr6       | 24,799,280  | 25,047,288  | 6        | 46.9             | 10          | 7.0        | L        |
| RSBN1L     | chr7       | 77,691,425  | 77,784,803  | 6        | 193.7            | 31          | 1.0        | A        |
| SEC23A     | chr14      | 39,026,918  | 39,108,528  | 6        | 73.6             | 7           | 7.0        | L        |
| SHPRH      | chr6       | 145,879,808 | 145,969,097 | 6        | 267.2            | 4           | 0.0        | E        |
| SIPAIL1    | chr14      | 71,524,311  | 71,746,229  | 6        | 389.6            | 22          | 7.0        | E        |
| SPPL3      | chr12      | 120,757,509 | 120,909,352 | 6        | 57.4             | 9           | 14.0       | L        |
| TCF25      | chr16      | 89,868,585  | 89,916,384  | 6        | -17.0            | 5           | 106.0      | L        |
| UBE2F-SCLY | chr2       | 237,961,944 | 238,104,413 | 6        | 34.6             | 6           | 46.0       | L        |
| UNKL       | chr16      | 1,358,204   | 1,419,720   | 6        | 79.5             | 7           | 15.0       | L        |
| WWP1       | chr8       | 86,337,764  | 86,472,949  | 6        | 177.4            | 3           | 7.0        | E        |
| ZNF473     | chr19      | 50,020,892  | 50,053,774  | 6        | 4.9              | 3           | 22.0       | L        |
| ZNRD1ASP   | chr6       | 29,996,010  | 30,066,189  | 6        | 128.5            | 4           | 122.0      | L        |
| BMP2K      | chr4       | 78,771,377  | 78,917,187  | 5        | 303.9            | 3           | 0.0        | E        |
| CLEC2B     | chr12      | 9,847,368   | 9,874,859   | 5        | 252.5            | 7           | 0.0        | E        |
| CSNK1G1    | chr15      | 64,160,516  | 64,361,259  | 5        | 33.5             | 8           | 7.0        | L        |
| CYLD       | chr16      | 50,737,049  | 50,806,935  | 5        | 172.8            | 3           | 7.0        | E        |

Table 9: Table of all genes identified within analysis. (continued)

| Gene    | Chromosome | Start Pos.  | End Pos.    | Patients | Freq. Change (%) | Peak Abund. | Long. Obs. | Criteria |
|---------|------------|-------------|-------------|----------|------------------|-------------|------------|----------|
| ELMO1   | chr7       | 36,847,905  | 37,454,326  | 5        | 6.8              | 34          | 46.0       | A        |
| EVL     | chr14      | 99,966,474  | 100,149,236 | 5        | 13.0             | 4           | 7.0        | L        |
| FANCL   | chr2       | 58,154,242  | 58,246,380  | 5        | 707.8            | 6           | 0.0        | E        |
| HIVEP1  | chr6       | 12,007,490  | 12,169,999  | 5        | 169.3            | 1           | 0.0        | E        |
| HS2ST1  | chr1       | 86,909,651  | 87,114,998  | 5        | 303.9            | 12          | 7.0        | E        |
| HSF5    | chr17      | 58,415,166  | 58,493,401  | 5        | 46.9             | 34          | 1.0        | A        |
| IQCB1   | chr3       | 121,764,760 | 121,840,079 | 5        | 144.8            | 79          | 15.0       | A        |
| KIFC1   | chr6       | 33,386,535  | 33,414,922  | 5        | 46.9             | 42          | 7.0        | A        |
| KMT2D   | chr12      | 49,013,974  | 49,060,324  | 5        | 7.7              | 33          | 0.0        | A        |
| LPXN    | chr11      | 58,521,870  | 58,583,239  | 5        | 438.5            | 9           | 46.0       | E        |
| MBD3    | chr19      | 1,571,670   | 1,597,761   | 5        | 267.2            | 2           | 7.0        | E        |
| MIR5096 | chr1       | 235,507,822 | 235,723,113 | 5        | 157.0            | 1           | 0.0        | L        |
| N4BP1   | chr16      | 48,533,725  | 48,615,209  | 5        | 291.7            | 32          | 106.0      | A        |
| PAG1    | chr8       | 80,962,810  | 81,117,068  | 5        | 1.0              | 2           | 32.0       | L        |
| PDE7A   | chr8       | 65,709,333  | 65,846,734  | 5        | 79.5             | 4           | 7.0        | L        |
| PHF20   | chr20      | 35,767,000  | 35,955,366  | 5        | 7.7              | 38          | 7.0        | A        |
| PLPPR3  | chr19      | 807,487     | 826,952     | 5        | 169.3            | 6           | 1.0        | E        |
| POM121  | chr7       | 72,874,334  | 72,956,440  | 5        | 414.0            | 29          | 1.0        | A        |
| RELB    | chr19      | 44,996,448  | 45,043,198  | 5        | 223.1            | 2           | 0.0        | E        |
| SEC31A  | chr4       | 82,813,508  | 82,905,571  | 5        | 46.9             | 66          | 7.0        | A        |
| SEPT9   | chr17      | 77,276,409  | 77,505,596  | 5        | -16.1            | 27          | 7.0        | A        |
| SFI1    | chr22      | 31,491,138  | 31,623,551  | 5        | -33.2            | 24          | 7.0        | A        |
| SMAP2   | chr1       | 40,368,705  | 40,428,326  | 5        | 120.3            | 61          | 7.0        | A        |
| STX8    | chr17      | 9,245,470   | 9,580,958   | 5        | 109.8            | 4           | 7.0        | L        |
| SYNJ1   | chr21      | 32,623,758  | 32,733,040  | 5        | 340.6            | 4           | 0.0        | E        |
| TNKS    | chr8       | 9,550,934   | 9,787,346   | 5        | 340.6            | 8           | 7.0        | E        |
| TTC3    | chr21      | 37,068,183  | 37,208,118  | 5        | 223.1            | 2           | 0.0        | E        |
| UBR3    | chr2       | 169,822,507 | 170,089,129 | 5        | 389.6            | 11          | 46.0       | E        |
| WWOX    | chr16      | 78,094,412  | 79,217,667  | 5        | 24.3             | 5           | 106.0      | L        |
| AGL     | chr1       | 99,845,083  | 99,929,023  | 4        | 1368.7           | 4           | 0.0        | E        |
| ANKRD46 | chr8       | 100,504,751 | 100,564,786 | 4        | 95.8             | 24          | 7.0        | A        |
| AQR     | chr15      | 34,851,350  | 34,974,794  | 4        | 28.5             | 84          | 14.0       | A        |
| CAAP1   | chr9       | 26,835,684  | 26,897,828  | 4        | -8.2             | 27          | 46.0       | A        |
| CNOT6   | chr5       | 180,489,398 | 180,583,405 | 4        | 22.4             | 2           | 7.0        | L        |
| DENND6A | chr3       | 57,620,453  | 57,698,089  | 4        | 267.2            | 3           | 0.0        | E        |
| EXOSC10 | chr1       | 11,061,612  | 11,104,910  | 4        | 71.3             | 70          | 7.0        | A        |
| FAM13B  | chr5       | 137,932,915 | 138,038,113 | 4        | 223.1            | 3           | 7.0        | E        |
| FUS     | chr16      | 31,175,109  | 31,199,871  | 4        | 438.5            | 12          | 0.0        | E        |
| GARS    | chr7       | 30,589,734  | 30,639,032  | 4        | 389.6            | 3           | 0.0        | E        |
| GOLPH3L | chr1       | 150,641,224 | 150,702,196 | 4        | -26.6            | 24          | 7.0        | A        |
| KDM5D   | chrY       | 19,700,414  | 19,749,939  | 4        | 144.8            | 2           | 14.0       | A        |

Table 9: Table of all genes identified within analysis. (continued)

| Gene         | Chromosome | Start Pos.  | End Pos.    | Patients | Freq. Change (%) | Peak Abund. | Long. Obs. | Criteria |
|--------------|------------|-------------|-------------|----------|------------------|-------------|------------|----------|
| MAD1L1       | chr7       | 1,810,791   | 2,237,948   | 4        | 20.2             | 35          | 46.0       | A        |
| MAP2K2       | chr19      | 4,085,321   | 4,129,129   | 4        | 46.9             | 2           | 106.0      | L        |
| MEMO1        | chr2       | 31,862,809  | 32,016,052  | 4        | -46.6            | 47          | 7.0        | A        |
| MSH5-SAPCD1  | chr6       | 31,734,947  | 31,769,847  | 4        | -51.0            | 43          | 7.0        | A        |
| MTMR3        | chr22      | 29,878,168  | 30,035,868  | 4        | -17.4            | 261         | 106.0      | A        |
| OGDH         | chr7       | 44,601,521  | 44,714,070  | 4        | -22.7            | 17          | 332.0      | L        |
| PATL1        | chr11      | 59,631,715  | 59,674,038  | 4        | 95.8             | 578         | 332.0      | A        |
| PDCD11       | chr10      | 103,391,654 | 103,451,262 | 4        | 193.7            | 27          | 152.0      | A        |
| PDE3B        | chr11      | 14,638,722  | 14,877,058  | 4        | 95.8             | 35          | 7.0        | A        |
| PEX5         | chr12      | 7,184,162   | 7,223,573   | 4        | 340.6            | 2           | 0.0        | E        |
| RAB18        | chr10      | 27,499,173  | 27,547,237  | 4        | 17.5             | 24          | 7.0        | A        |
| RMND5A       | chr2       | 86,715,290  | 86,783,041  | 4        | Inf              | 26          | 0.0        | A        |
| RPA3         | chr7       | 7,631,562   | 7,723,607   | 4        | 83.6             | 87          | 106.0      | A        |
| TMTC3        | chr12      | 88,137,295  | 88,204,887  | 4        | 223.1            | 2           | 0.0        | E        |
| TRIO         | chr5       | 14,138,701  | 14,515,204  | 4        | 928.1            | 61          | 106.0      | A        |
| XPO1         | chr2       | 61,472,933  | 61,543,283  | 4        | 83.6             | 25          | 106.0      | A        |
| ZC3H7A       | chr16      | 11,745,585  | 11,802,258  | 4        | 311.2            | 11          | 1.0        | E        |
| AKAP9        | chr7       | 91,935,874  | 92,115,673  | 3        | 17.5             | 25          | 0.0        | A        |
| CHD1L        | chr1       | 147,168,193 | 147,300,766 | 3        | Inf              | 25          | 1.0        | A        |
| DCUN1D4      | chr4       | 51,837,999  | 51,921,837  | 3        | 22.4             | 32          | 106.0      | A        |
| EIF2AK4      | chr15      | 39,929,123  | 40,040,596  | 3        | 634.4            | 43          | 7.0        | A        |
| NGDN         | chr14      | 23,464,688  | 23,483,193  | 3        | 120.3            | 44          | 0.0        | A        |
| PRKD2        | chr19      | 46,669,315  | 46,722,127  | 3        | 144.8            | 24          | 22.0       | A        |
| RABGAP1      | chr9       | 122,936,008 | 123,109,868 | 3        | 2.8              | 29          | 7.0        | A        |
| SNAP29       | chr22      | 20,854,003  | 20,896,213  | 3        | 487.5            | 27          | 7.0        | A        |
| STT3B        | chr3       | 31,527,500  | 31,642,622  | 3        | 252.5            | 6           | 0.0        | E        |
| ZNF573       | chr19      | 37,733,301  | 37,784,590  | 3        | 17.5             | 86          | 735.0      | A        |
| C20orf196    | chr20      | 5,745,386   | 5,869,407   | 2        | -2.1             | 1           | 0.0        | A        |
| CRTAP        | chr3       | 33,108,957  | 33,152,773  | 2        | 193.7            | 35          | 7.0        | A        |
| GPN1         | chr2       | 27,623,647  | 27,655,846  | 2        | 46.9             | 62          | 1.0        | A        |
| JMJD6        | chr17      | 76,707,831  | 76,731,799  | 2        | 193.7            | 53          | 1.0        | A        |
| KCTD3        | chr1       | 215,562,378 | 215,626,821 | 2        | -26.6            | 1           | 0.0        | A        |
| LINC01473    | chr2       | 186,028,533 | 186,091,317 | 2        | Inf              | 82          | 7.0        | A        |
| LOC101927151 | chr19      | 27,788,466  | 27,811,780  | 2        | 193.7            | 31          | 46.0       | A        |
| PHF12        | chr17      | 28,900,252  | 28,956,490  | 2        | 17.5             | 40          | 106.0      | A        |
| POLG2        | chr17      | 64,472,784  | 64,502,066  | 2        | 83.6             | 43          | 7.0        | A        |
| RASEF        | chr9       | 82,974,584  | 83,068,128  | 2        | Inf              | 43          | 46.0       | A        |
| SNHG12       | chr1       | 28,573,537  | 28,586,854  | 2        | 340.6            | 96          | 332.0      | A        |
| TAC3         | chr12      | 57,004,996  | 57,021,560  | 2        | -51.0            | 42          | 7.0        | A        |
| TGFBR2       | chr3       | 30,601,501  | 30,699,141  | 2        | 193.7            | 31          | 7.0        | A        |
| ACTL6A       | chr3       | 179,557,879 | 179,593,405 | 1        | -70.6            | 40          | 0.0        | A        |

Table 9: Table of all genes identified within analysis. (*continued*)

| Gene        | Chromosome | Start Pos.  | End Pos.    | Patients | Freq. Change (%) | Peak Abund. | Long. Obs. | Criteria |
|-------------|------------|-------------|-------------|----------|------------------|-------------|------------|----------|
| C19orf48    | chr19      | 50,792,692  | 50,809,853  | 1        | 46.9             | 28          | 46.0       | A        |
| CD109       | chr6       | 73,691,084  | 73,833,317  | 1        | -81.6            | 32          | 0.0        | A        |
| KARS        | chr16      | 75,622,723  | 75,652,687  | 1        | 46.9             | 24          | 0.0        | A        |
| MICAL2      | chr11      | 12,105,575  | 12,268,790  | 1        | -26.6            | 39          | 15.0       | A        |
| RBAK-RBAKDN | chr7       | 5,040,820   | 5,078,223   | 1        | 46.9             | 28          | 7.0        | A        |
| RTCA-AS1    | chr1       | 100,259,741 | 100,271,174 | 1        | Inf              | 27          | 0.0        | A        |
| UXT-AS1     | chrX       | 47,653,832  | 47,665,111  | 1        | Inf              | 43          | 7.0        | A        |
| ZNF92       | chr7       | 65,368,798  | 65,406,135  | 1        | Inf              | 42          | 7.0        | A        |
| EIF2B3      | chr1       | 44,845,521  | 44,991,722  | 8        | -51.0            | 6           | 1.0        | D        |
| EXOC2       | chr6       | 480,137     | 698,141     | 5        | -56.8            | 4           | 0.0        | D        |
| RNPS1       | chr16      | 2,248,115   | 2,273,412   | 5        | -65.9            | 2           | 0.0        | D        |
